# Supplementary material for: Resistive pulse analysis of chiral amino acids utilizing metal–amino acid crystallization differences
Source: Royal Society of Chemistry journal article supplement (doi:10.1039/d4an00347k), 2024-01-01
Supplement: d4an00347k1.pdf [file d4an00347k1.pdf]

## Bowtie

|             |                          |
|-------------|--------------------------|
| Report date | Feb 19, 2024, 3:01:28 PM |
|-------------|--------------------------|

# Contents

|                                         |           |
|-----------------------------------------|-----------|
| <b>1. Global Definitions .....</b>      | <b>3</b>  |
| 1.1. Parameters.....                    | 3         |
| <b>2. Component 1 .....</b>             | <b>4</b>  |
| 2.1. Definitions.....                   | 4         |
| 2.2. Geometry 1 .....                   | 5         |
| 2.3. Transport of Diluted Species ..... | 7         |
| 2.4. Electrostatics .....               | 27        |
| 2.5. Mesh 1 .....                       | 46        |
| <b>3. Study 1 .....</b>                 | <b>52</b> |
| 3.1. Stationary .....                   | 52        |
| 3.2. Solver Configurations.....         | 52        |
| <b>4. Results .....</b>                 | <b>56</b> |
| 4.1. Data Sets.....                     | 56        |
| 4.2. Derived Values .....               | 58        |
| 4.3. Tables.....                        | 58        |
| 4.4. Plot Groups.....                   | 59        |

# 1 Global Definitions

|      |                          |
|------|--------------------------|
| Date | Feb 12, 2024, 7:04:07 AM |
|------|--------------------------|

## GLOBAL SETTINGS

|             |                                      |
|-------------|--------------------------------------|
| Name        | Bowtie.mph                           |
| Path        | C:\Users\hl5630\Downloads\bowtie.mph |
| Version     | COMSOL Multiphysics 6.2 (Build: 290) |
| Unit system | SI                                   |

## USED PRODUCTS

|                      |
|----------------------|
| Microfluidics Module |
| COMSOL Multiphysics  |

## COMPUTER INFORMATION

|                  |                                                         |
|------------------|---------------------------------------------------------|
| CPU              | Intel64 Family 6 Model 85 Stepping 7, 4 cores, 8 GB RAM |
| Operating system | Windows 10                                              |

## 1.1 PARAMETERS

### PARAMETERS 1

| Name | Expression | Value    | Description |
|------|------------|----------|-------------|
| Loc  | 65[um]     | 6.5E-5 m |             |

## 2 Component 1

|      |                          |
|------|--------------------------|
| Date | Feb 12, 2024, 6:59:13 AM |
|------|--------------------------|

### SETTINGS

| Description                                                 | Value                      |
|-------------------------------------------------------------|----------------------------|
| Unit system                                                 | Same as global system (SI) |
| Geometry shape function                                     | Automatic                  |
| Avoid inverted elements by curving interior domain elements | Off                        |

### SPATIAL FRAME COORDINATES

| First | Second | Third |
|-------|--------|-------|
| r     | phi    | z     |

### MATERIAL FRAME COORDINATES

| First | Second | Third |
|-------|--------|-------|
| R     | PHI    | Z     |

### GEOMETRY FRAME COORDINATES

| First | Second | Third |
|-------|--------|-------|
| Rg    | PHIg   | Zg    |

### MESH FRAME COORDINATES

| First | Second | Third |
|-------|--------|-------|
| Rm    | PHIm   | Zm    |

## 2.1 DEFINITIONS

### 2.1.1 Coordinate Systems

#### Boundary System 1

|                        |                 |
|------------------------|-----------------|
| Coordinate system type | Boundary system |
| Tag                    | sys1            |

### COORDINATE NAMES

| First | Second | Third |
|-------|--------|-------|
| t1    | to     | n     |

## 2.2 GEOMETRY 1

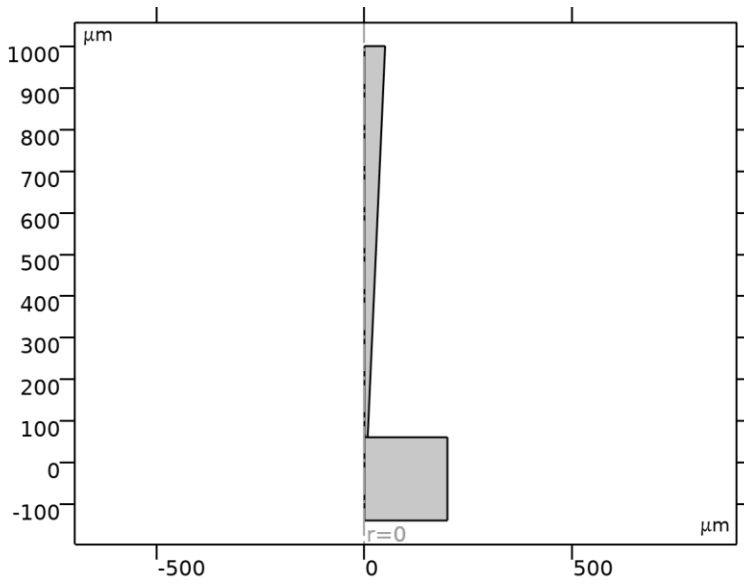

Geometry 1

### UNITS

|              |               |
|--------------|---------------|
| Length unit  | $\mu\text{m}$ |
| Angular unit | deg           |

### GEOMETRY STATISTICS

| Description          | Value |
|----------------------|-------|
| Space dimension      | 2     |
| Number of domains    | 2     |
| Number of boundaries | 12    |
| Number of vertices   | 11    |

### 2.2.1 Rectangle 1 (r1)

#### POSITION

| Description | Value     |
|-------------|-----------|
| Position    | {0, -140} |

#### SIZE

| Description | Value |
|-------------|-------|
| Width       | 200   |
| Height      | 200   |

#### INFORMATION

| Description     | Value                                              |
|-----------------|----------------------------------------------------|
| Last build time | < 1 second                                         |
| Built with      | COMSOL 6.2.0.290 (win64), Feb 19, 2024, 2:52:52 PM |

## 2.2.2 Polygon 1 (pol1)

### OBJECT TYPE

| Description | Value |
|-------------|-------|
| Type        | Solid |

### COORDINATES

| Description | Value                |
|-------------|----------------------|
| Data source | Vectors              |
| r           | {0, 8, 50, 0}        |
| z           | {60, 60, 1000, 1000} |

### INFORMATION

| Description     | Value                                              |
|-----------------|----------------------------------------------------|
| Last build time | < 1 second                                         |
| Built with      | COMSOL 6.2.0.290 (win64), Feb 19, 2024, 2:52:52 PM |

## 2.2.3 Rectangle 2 (r2)

### POSITION

| Description | Value    |
|-------------|----------|
| Position    | {0, Loc} |
| Base        | Center   |

### SIZE

| Description | Value |
|-------------|-------|
| Width       | 2.5   |
| Height      | 4.42  |

### INFORMATION

| Description     | Value                                              |
|-----------------|----------------------------------------------------|
| Last build time | < 1 second                                         |
| Built with      | COMSOL 6.2.0.290 (win64), Feb 19, 2024, 2:52:52 PM |

## 2.2.4 Difference 1 (dif1)

### INFORMATION

| Description     | Value                                              |
|-----------------|----------------------------------------------------|
| Last build time | < 1 second                                         |
| Built with      | COMSOL 6.2.0.290 (win64), Feb 19, 2024, 2:52:52 PM |

## 2.2.5 Form Union (fin)

### INFORMATION

| Description     | Value                                                                                   |
|-----------------|-----------------------------------------------------------------------------------------|
| Details         | {Formed union of 1 solid object., Union has 2 domains, 12 boundaries, and 11 vertices.} |
| Last build time | < 1 second                                                                              |
| Built with      | COMSOL 6.2.0.290 (win64), Feb 19, 2024, 2:52:52 PM                                      |

## 2.3 TRANSPORT OF DILUTED SPECIES

### USED PRODUCTS

Microfluidics Module  
COMSOL Multiphysics

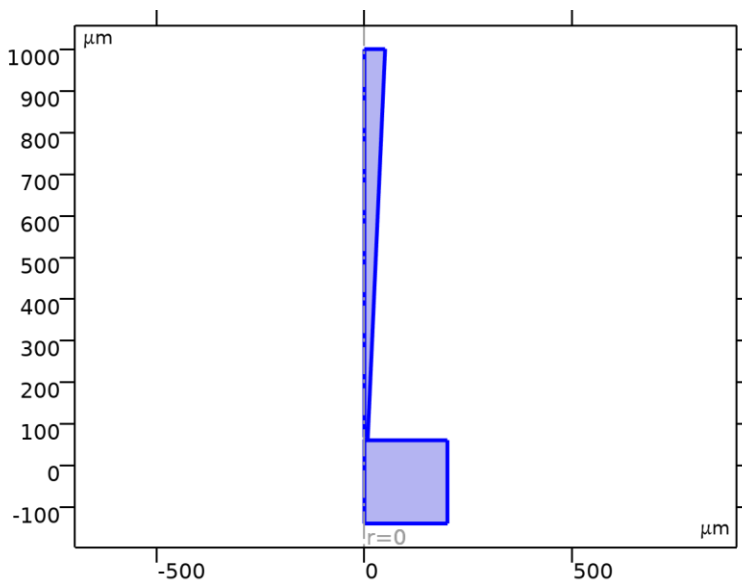

*Transport of Diluted Species*

### SELECTION

|                        |                                          |
|------------------------|------------------------------------------|
| Geometric entity level | Domain                                   |
| Selection              | Geometry geom1: Dimension 2: All domains |

### EQUATIONS

$$\nabla \cdot \mathbf{J}_i = R_i$$

$$\mathbf{J}_i = -D_i \nabla C_i - z_i \mu_{m,j} F C_i \nabla V$$

### 2.3.1 Interface Settings

#### Discretization

##### SETTINGS

| Description   | Value  |
|---------------|--------|
| Concentration | Linear |

##### SETTINGS

| Description   | Value            |
|---------------|------------------|
| Equation form | Study controlled |

#### Species Activity

##### SETTINGS

| Description      | Value |
|------------------|-------|
| Species activity | Ideal |

#### Transport Mechanisms

##### SETTINGS

| Description                   | Value |
|-------------------------------|-------|
| Convection                    | Off   |
| Migration in electric field   | On    |
| Mass transfer in porous media | Off   |

### 2.3.2 Variables

| Name      | Expression | Unit | Description                     | Selection            | Details |
|-----------|------------|------|---------------------------------|----------------------|---------|
| tds.d     | 1          | 1    | Out-of-plane geometry extension | Global               |         |
| tds.f_cNa | 1          | 1    | Activity coefficient            | Domains 1–2          |         |
| tds.f_cCl | 1          | 1    | Activity coefficient            | Domains 1–2          |         |
| tds.nr    | nr         | 1    | Normal vector, r-component      | Boundary 4           |         |
| tds.nphi  | 0          | 1    | Normal vector, phi-component    | Boundary 4           |         |
| tds.nz    | nz         | 1    | Normal vector, z-component      | Boundary 4           |         |
| tds.nr    | dnr        | 1    | Normal vector, r-component      | Boundaries 1–3, 5–12 |         |



| Name         | Expression | Unit | Description                         | Selection            | Details |
|--------------|------------|------|-------------------------------------|----------------------|---------|
| tds.nphi     | 0          | 1    | Normal vector, phi-component        | Boundaries 1–3, 5–12 |         |
| tds.nz       | dnz        | 1    | Normal vector, z-component          | Boundaries 1–3, 5–12 |         |
| tds.nR       | nR         | 1    | Normal vector, R-component          | Boundary 4           |         |
| tds.nPHI     | 0          | 1    | Normal vector, PHI-component        | Boundary 4           |         |
| tds.nZ       | nZ         | 1    | Normal vector, Z-component          | Boundary 4           |         |
| tds.nR       | dnR        | 1    | Normal vector, R-component          | Boundaries 1–3, 5–12 |         |
| tds.nPHI     | 0          | 1    | Normal vector, PHI-component        | Boundaries 1–3, 5–12 |         |
| tds.nZ       | dnZ        | 1    | Normal vector, Z-component          | Boundaries 1–3, 5–12 |         |
| tds.nRg      | nRg        | 1    | Normal vector, Rg-component         | Boundary 4           |         |
| tds.nPHIg    | 0          | 1    | Normal vector, PHIg-component       | Boundary 4           |         |
| tds.nZg      | nZg        | 1    | Normal vector, Zg-component         | Boundary 4           |         |
| tds.nRg      | dnRg       | 1    | Normal vector, Rg-component         | Boundaries 1–3, 5–12 |         |
| tds.nPHIg    | 0          | 1    | Normal vector, PHIg-component       | Boundaries 1–3, 5–12 |         |
| tds.nZg      | dnZg       | 1    | Normal vector, Zg-component         | Boundaries 1–3, 5–12 |         |
| tds.nrmesh   | nrmesh     | 1    | Normal vector (mesh), r-component   | Boundary 4           |         |
| tds.nphimesh | 0          | 1    | Normal vector (mesh), phi-component | Boundary 4           |         |
| tds.nzmesh   | nzmesh     | 1    | Normal vector (mesh), z-component   | Boundary 4           |         |
| tds.nrmesh   | dnrmesh    | 1    | Normal vector (mesh), r-component   | Boundaries 1–3, 5–12 |         |
| tds.nphimesh | 0          | 1    | Normal vector                       | Boundaries 1–        |         |

| Name         | Expression               | Unit                    | Description                                         | Selection            | Details     |
|--------------|--------------------------|-------------------------|-----------------------------------------------------|----------------------|-------------|
|              |                          |                         | (mesh), phi-component                               | 3, 5–12              |             |
| tds.nzmesh   | dnzmesh                  | 1                       | Normal vector (mesh), z-component                   | Boundaries 1–3, 5–12 |             |
| tds.nrc      | nrc/tds.ncLen            | 1                       | Normal vector, r-component                          | Boundaries 1–12      |             |
| tds.nphic    | 0                        | 1                       | Normal vector, phi-component                        | Boundaries 1–12      |             |
| tds.nzc      | nzc/tds.ncLen            | 1                       | Normal vector, z-component                          | Boundaries 1–12      |             |
| tds.ncLen    | $\sqrt{nrc^2+nzc^2+eps}$ | 1                       | Help variable                                       | Boundaries 1–12      |             |
| tds.R_cNa    | 0                        | mol/(m <sup>3</sup> ·s) | Total rate expression                               | Domains 1–2          | + operation |
| tds.cP_cNa   | 0                        | mol/kg                  | Concentration species adsorbed to the solid         | Domains 1–2          | + operation |
| tds.cP_cNa   | 0                        | mol/kg                  | Concentration species adsorbed to the solid         | Boundaries 1–12      | + operation |
| tds.KP_cNa   | 0                        | m <sup>3</sup> /kg      | Adsorption isotherm, first concentration derivative | Domains 1–2          | + operation |
| tds.KP_cNa   | 0                        | m <sup>3</sup> /kg      | Adsorption isotherm, first concentration derivative | Boundaries 1–12      | + operation |
| tds.Rads_cNa | 0                        | mol/(m <sup>3</sup> ·s) | Total adsorption rate                               | Domains 1–2          | + operation |
| tds.DiT_cNa  | 0                        | m <sup>2</sup> /s       | Turbulent diffusivity                               | Domains 1–2          |             |
| tds.cVar_cNa | cNa                      | mol/m <sup>3</sup>      | Species                                             | Boundaries 1–12      |             |
| tds.cVar_cNa | cNa                      | mol/m <sup>3</sup>      | Species                                             | Points 1–11          |             |
| tds.R_cCl    | 0                        | mol/(m <sup>3</sup> ·s) | Total rate expression                               | Domains 1–2          | + operation |
| tds.cP_cCl   | 0                        | mol/kg                  | Concentration species adsorbed to the solid         | Domains 1–2          | + operation |
| tds.cP_cCl   | 0                        | mol/kg                  | Concentration                                       | Boundaries 1–        | + operation |

| Name         | Expression | Unit                    | Description                                         | Selection       | Details     |
|--------------|------------|-------------------------|-----------------------------------------------------|-----------------|-------------|
|              |            |                         | species adsorbed to the solid                       | 12              |             |
| tds.KP_cCl   | 0          | m <sup>3</sup> /kg      | Adsorption isotherm, first concentration derivative | Domains 1–2     | + operation |
| tds.KP_cCl   | 0          | m <sup>3</sup> /kg      | Adsorption isotherm, first concentration derivative | Boundaries 1–12 | + operation |
| tds.Rads_cCl | 0          | mol/(m <sup>3</sup> ·s) | Total adsorption rate                               | Domains 1–2     | + operation |
| tds.DiT_cCl  | 0          | m <sup>2</sup> /s       | Turbulent diffusivity                               | Domains 1–2     |             |
| tds.cVar_cCl | cCl        | mol/m <sup>3</sup>      | Species                                             | Boundaries 1–12 |             |
| tds.cVar_cCl | cCl        | mol/m <sup>3</sup>      | Species                                             | Points 1–11     |             |
| tds.poro     | 1          | 1                       | Porosity                                            | Domains 1–2     |             |
| tds.theta_g  | 0          | 1                       | Gas volume fraction                                 | Domains 1–2     |             |
| tds.theta_l  | 1          | 1                       | Liquid volume fraction                              | Domains 1–2     |             |
| tds.theta    | tds.poro   | 1                       | Mobile fluid volume fraction                        | Domains 1–2     |             |

### 2.3.3 Species Charges

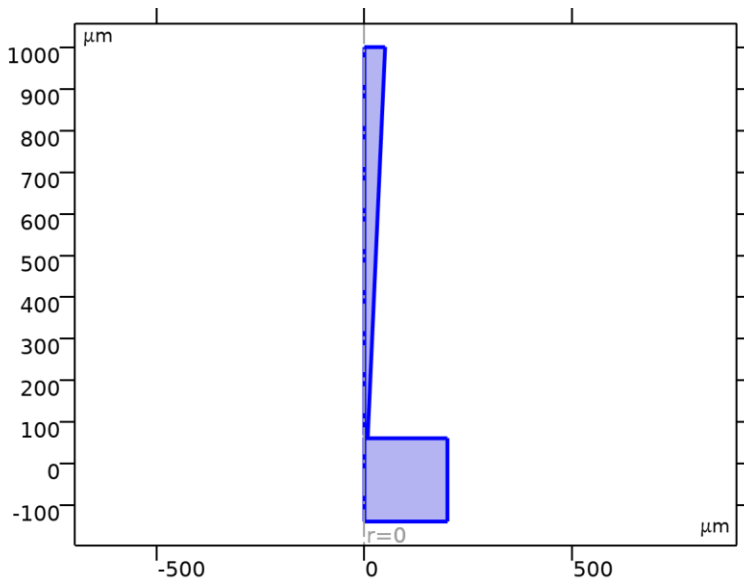

*Species Charges*

#### SELECTION

|                        |                                          |
|------------------------|------------------------------------------|
| Geometric entity level | Domain                                   |
| Selection              | Geometry geom1: Dimension 2: All domains |

#### Charge

##### SETTINGS

| Description   | Value   |
|---------------|---------|
| Charge number | {1, -1} |

#### Model Input

##### SETTINGS

| Description | Value              |
|-------------|--------------------|
| Temperature | Common model input |

#### Variables

| Name      | Expression | Unit | Description   | Selection   |
|-----------|------------|------|---------------|-------------|
| tds.z_cNa | 1          | 1    | Charge number | Domains 1-2 |
| tds.z_cCl | -1         | 1    | Charge number | Domains 1-2 |

### 2.3.4 Transport Properties 1

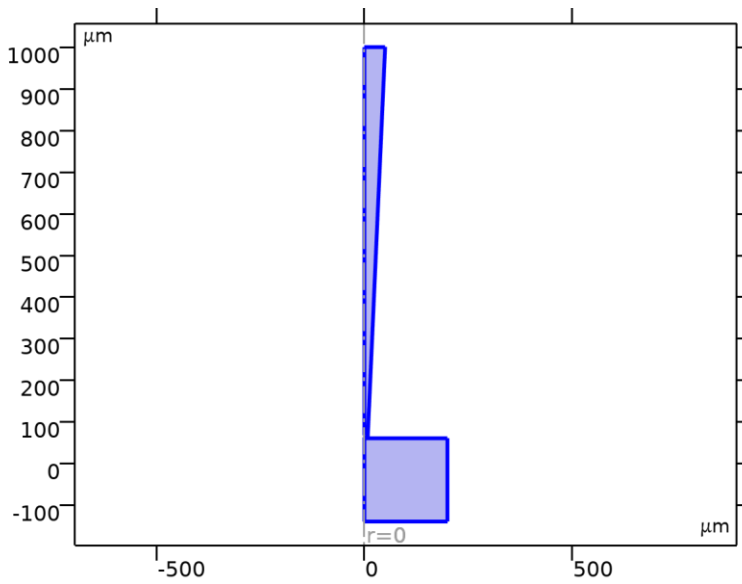

Transport Properties 1

#### SELECTION

|                        |                                          |
|------------------------|------------------------------------------|
| Geometric entity level | Domain                                   |
| Selection              | Geometry geom1: Dimension 2: All domains |

#### EQUATIONS

$$\nabla \cdot \mathbf{J}_i = R_i$$

.....

$$\mathbf{J}_i = -D_i \nabla C_i - z_i u_{m,j} F C_i \nabla V$$

#### Diffusion

##### SETTINGS

| Description           | Value        | Unit              |
|-----------------------|--------------|-------------------|
| Source                | Material     |                   |
| Material              | None         |                   |
| Diffusion coefficient | User defined |                   |
| Diffusion coefficient | 1.33E-9      | m <sup>2</sup> /s |
| Diffusion coefficient | User defined |                   |
| Diffusion coefficient | 2.03E-9      | m <sup>2</sup> /s |

#### Migration in Electric Field

##### SETTINGS

| Description        | Value                   |
|--------------------|-------------------------|
| Electric potential | Electric potential (es) |

| Description | Value                      |
|-------------|----------------------------|
| Mobility    | Nernst - Einstein relation |

## Coordinate System Selection

### SETTINGS

| Description       | Value                    |
|-------------------|--------------------------|
| Coordinate system | Global coordinate system |

## Model Input

### SETTINGS

| Description | Value        | Unit |
|-------------|--------------|------|
| Temperature | User defined |      |
| Temperature | 293.15       | K    |

## Variables

| Name           | Expression                                                                    | Unit                    | Description                 | Selection               | Details |
|----------------|-------------------------------------------------------------------------------|-------------------------|-----------------------------|-------------------------|---------|
| domflux.cNar   | $2*(tds.dflux\_cNar+tds.mflux\_cNar)*pi*r*tds.d$                              | mol/(m·s)               | Domain flux, r-component    | Domains 1–2             |         |
| domflux.cNaz   | $2*(tds.dflux\_cNaz+tds.mflux\_cNaz)*pi*r*tds.d$                              | mol/(m·s)               | Domain flux, z-component    | Domains 1–2             |         |
| domflux.cClr   | $2*(tds.dflux\_cClr+tds.mflux\_cClr)*pi*r*tds.d$                              | mol/(m·s)               | Domain flux, r-component    | Domains 1–2             |         |
| domflux.cClz   | $2*(tds.dflux\_cClz+tds.mflux\_cClz)*pi*r*tds.d$                              | mol/(m·s)               | Domain flux, z-component    | Domains 1–2             |         |
| tds.ndflux_cNa | $tds.dflux\_cNar*tds.nrc+tds.dflux\_cNaphi*tds.nphic+tds.dflux\_cNaz*tds.nzc$ | mol/(m <sup>2</sup> ·s) | Normal diffusive flux       | Boundaries 2, 4–5, 7–12 |         |
| tds.nmflux_cNa | $tds.mflux\_cNar*tds.nrc+tds.mflux\_cNaphi*tds.nphic+tds.mflux\_cNaz*tds.nzc$ | mol/(m <sup>2</sup> ·s) | Normal electrophoretic flux | Boundaries 2, 4–5, 7–12 |         |
| tds.ntflux_cNa | tds.bndFlux_cNa                                                               | mol/(m <sup>2</sup> ·s) | Normal total flux           | Boundaries 2, 4–5, 7–12 |         |
| tds.ndflux_cCl | $tds.dflux\_cClr*tds.nrc+tds.dflux\_cClphi*tds.nphic+tds.dflux\_cClz*tds.nzc$ | mol/(m <sup>2</sup> ·s) | Normal diffusive flux       | Boundaries 2, 4–5, 7–12 |         |

| Name             | Expression                                                                              | Unit                    | Description                                   | Selection               | Details |
|------------------|-----------------------------------------------------------------------------------------|-------------------------|-----------------------------------------------|-------------------------|---------|
| tds.nmflux_cCl   | $tds.mflux\_cClr * tds.nrc + tds.mflux\_cClphi * tds.nphic + tds.mflux\_cClz * tds.nzc$ | mol/(m <sup>2</sup> ·s) | Normal electrophoretic flux                   | Boundaries 2, 4–5, 7–12 |         |
| tds.ntflux_cCl   | tds.bndFlux_cCl                                                                         | mol/(m <sup>2</sup> ·s) | Normal total flux                             | Boundaries 2, 4–5, 7–12 |         |
| tds.bndFlux_cNa  | $0.25 * (uflux\_spatial(cNa) - dflux\_spatial(cNa)) / (\pi * r * tds.d)$                | mol/(m <sup>2</sup> ·s) | Boundary flux                                 | Boundary 4              | Meta    |
| tds.bndFlux_cNa  | $- dflux\_spatial(cNa) / tds.d$                                                         | mol/(m <sup>2</sup> ·s) | Boundary flux                                 | Boundaries 1, 3, 6      |         |
| tds.bndFlux_cNa  | $- 0.5 * dflux\_spatial(cNa) / (\pi * r * tds.d)$                                       | mol/(m <sup>2</sup> ·s) | Boundary flux                                 | Boundaries 2, 5, 7–12   | Meta    |
| tds.bndFlux_cCl  | $0.25 * (uflux\_spatial(cCl) - dflux\_spatial(cCl)) / (\pi * r * tds.d)$                | mol/(m <sup>2</sup> ·s) | Boundary flux                                 | Boundary 4              | Meta    |
| tds.bndFlux_cCl  | $- dflux\_spatial(cCl) / tds.d$                                                         | mol/(m <sup>2</sup> ·s) | Boundary flux                                 | Boundaries 1, 3, 6      |         |
| tds.bndFlux_cCl  | $- 0.5 * dflux\_spatial(cCl) / (\pi * r * tds.d)$                                       | mol/(m <sup>2</sup> ·s) | Boundary flux                                 | Boundaries 2, 5, 7–12   | Meta    |
| tds.DF_cNarr     | 1.33E-9[m <sup>2</sup> /s]                                                              | m <sup>2</sup> /s       | Fluid diffusion coefficient, rr-component     | Domains 1–2             |         |
| tds.DF_cNaphir   | 0                                                                                       | m <sup>2</sup> /s       | Fluid diffusion coefficient, phir-component   | Domains 1–2             |         |
| tds.DF_cNazr     | 0                                                                                       | m <sup>2</sup> /s       | Fluid diffusion coefficient, zr-component     | Domains 1–2             |         |
| tds.DF_cNarphi   | 0                                                                                       | m <sup>2</sup> /s       | Fluid diffusion coefficient, rphi-component   | Domains 1–2             |         |
| tds.DF_cNaphiphi | 1.33E-9[m <sup>2</sup> /s]                                                              | m <sup>2</sup> /s       | Fluid diffusion coefficient, phiphi-component | Domains 1–2             |         |
| tds.DF_cNazphi   | 0                                                                                       | m <sup>2</sup> /s       | Fluid diffusion                               | Domains 1–2             |         |

| Name            | Expression                   | Unit              | Description                                 | Selection   | Details     |
|-----------------|------------------------------|-------------------|---------------------------------------------|-------------|-------------|
|                 |                              |                   | coefficient, zphi-component                 |             |             |
| tds.DF_cNarz    | 0                            | m <sup>2</sup> /s | Fluid diffusion coefficient, rz-component   | Domains 1–2 |             |
| tds.DF_cNaphiz  | 0                            | m <sup>2</sup> /s | Fluid diffusion coefficient, phiz-component | Domains 1–2 |             |
| tds.DF_cNazz    | 1.33E-9[m <sup>2</sup> /s]   | m <sup>2</sup> /s | Fluid diffusion coefficient, zz-component   | Domains 1–2 |             |
| tds.D_cNarr     | tds.DF_cNarr+tds.DiT_cNa     | m <sup>2</sup> /s | Diffusion coefficient, rr-component         | Domains 1–2 | + operation |
| tds.D_cNaphir   | tds.DF_cNaphir               | m <sup>2</sup> /s | Diffusion coefficient, phir-component       | Domains 1–2 | + operation |
| tds.D_cNazr     | tds.DF_cNazr                 | m <sup>2</sup> /s | Diffusion coefficient, zr-component         | Domains 1–2 | + operation |
| tds.D_cNarphi   | tds.DF_cNarphi               | m <sup>2</sup> /s | Diffusion coefficient, rphi-component       | Domains 1–2 | + operation |
| tds.D_cNaphiphi | tds.DF_cNaphiphi+tds.DiT_cNa | m <sup>2</sup> /s | Diffusion coefficient, phiphi-component     | Domains 1–2 | + operation |
| tds.D_cNazphi   | tds.DF_cNazphi               | m <sup>2</sup> /s | Diffusion coefficient, zphi-component       | Domains 1–2 | + operation |
| tds.D_cNarz     | tds.DF_cNarz                 | m <sup>2</sup> /s | Diffusion coefficient, rz-component         | Domains 1–2 | + operation |
| tds.D_cNaphiz   | tds.DF_cNaphiz               | m <sup>2</sup> /s | Diffusion coefficient, phiz-component       | Domains 1–2 | + operation |
| tds.D_cNazz     | tds.DF_cNazz+tds.DiT_cNa     | m <sup>2</sup> /s | Diffusion coefficient, zz-component         | Domains 1–2 | + operation |
| tds.DF_cClrr    | 2.03E-9[m <sup>2</sup> /s]   | m <sup>2</sup> /s | Fluid diffusion coefficient, rr-component   | Domains 1–2 |             |
| tds.DF_cClphir  | 0                            | m <sup>2</sup> /s | Fluid diffusion                             | Domains 1–2 |             |



| Name             | Expression                   | Unit              | Description                                   | Selection   | Details     |
|------------------|------------------------------|-------------------|-----------------------------------------------|-------------|-------------|
|                  |                              |                   | coefficient, phir-component                   |             |             |
| tds.DF_cClzr     | 0                            | m <sup>2</sup> /s | Fluid diffusion coefficient, zr-component     | Domains 1–2 |             |
| tds.DF_cClrphi   | 0                            | m <sup>2</sup> /s | Fluid diffusion coefficient, rphi-component   | Domains 1–2 |             |
| tds.DF_cClphiphi | 2.03E-9[m <sup>2</sup> /s]   | m <sup>2</sup> /s | Fluid diffusion coefficient, phiphi-component | Domains 1–2 |             |
| tds.DF_cClzphi   | 0                            | m <sup>2</sup> /s | Fluid diffusion coefficient, zphi-component   | Domains 1–2 |             |
| tds.DF_cClrz     | 0                            | m <sup>2</sup> /s | Fluid diffusion coefficient, rz-component     | Domains 1–2 |             |
| tds.DF_cClphiz   | 0                            | m <sup>2</sup> /s | Fluid diffusion coefficient, phiz-component   | Domains 1–2 |             |
| tds.DF_cClzz     | 2.03E-9[m <sup>2</sup> /s]   | m <sup>2</sup> /s | Fluid diffusion coefficient, zz-component     | Domains 1–2 |             |
| tds.D_cClrr      | tds.DF_cClrr+tds.DiT_cCl     | m <sup>2</sup> /s | Diffusion coefficient, rr-component           | Domains 1–2 | + operation |
| tds.D_cClphir    | tds.DF_cClphir               | m <sup>2</sup> /s | Diffusion coefficient, phir-component         | Domains 1–2 | + operation |
| tds.D_cClzr      | tds.DF_cClzr                 | m <sup>2</sup> /s | Diffusion coefficient, zr-component           | Domains 1–2 | + operation |
| tds.D_cClrphi    | tds.DF_cClrphi               | m <sup>2</sup> /s | Diffusion coefficient, rphi-component         | Domains 1–2 | + operation |
| tds.D_cClphiphi  | tds.DF_cClphiphi+tds.DiT_cCl | m <sup>2</sup> /s | Diffusion coefficient, phiphi-component       | Domains 1–2 | + operation |
| tds.D_cClzphi    | tds.DF_cClzphi               | m <sup>2</sup> /s | Diffusion coefficient, zphi-component         | Domains 1–2 | + operation |

| Name              | Expression                                                                                     | Unit                    | Description                           | Selection   | Details     |
|-------------------|------------------------------------------------------------------------------------------------|-------------------------|---------------------------------------|-------------|-------------|
| tds.D_cClrz       | tds.DF_cClrz                                                                                   | m <sup>2</sup> /s       | Diffusion coefficient, rz-component   | Domains 1–2 | + operation |
| tds.D_cClphiz     | tds.DF_cClphiz                                                                                 | m <sup>2</sup> /s       | Diffusion coefficient, phiz-component | Domains 1–2 | + operation |
| tds.D_cClzz       | tds.DF_cClzz+tds.DiT_cCl                                                                       | m <sup>2</sup> /s       | Diffusion coefficient, zz-component   | Domains 1–2 | + operation |
| tds.Dav_cNa       | 0.5*(tds.D_cNarr+tds.D_cNaz)                                                                   | m <sup>2</sup> /s       | Average diffusion coefficient         | Domains 1–2 |             |
| tds.Dav_cCl       | 0.5*(tds.D_cClrr+tds.D_cClzz)                                                                  | m <sup>2</sup> /s       | Average diffusion coefficient         | Domains 1–2 |             |
| tds.tflux_cNar    | tds.dflux_cNar+tds.mflux_cNar                                                                  | mol/(m <sup>2</sup> ·s) | Total flux, r-component               | Domains 1–2 | + operation |
| tds.tflux_cNaphi  | tds.dflux_cNaphi+tds.mflux_cNaphi                                                              | mol/(m <sup>2</sup> ·s) | Total flux, phi-component             | Domains 1–2 | + operation |
| tds.tflux_cNaz    | tds.dflux_cNaz+tds.mflux_cNaz                                                                  | mol/(m <sup>2</sup> ·s) | Total flux, z-component               | Domains 1–2 | + operation |
| tds.dfluxMag_cNa  | sqrt(tds.dflux_cNar <sup>2</sup> +tds.dflux_cNaphi <sup>2</sup> +tds.dflux_cNaz <sup>2</sup> ) | mol/(m <sup>2</sup> ·s) | Diffusive flux magnitude              | Domains 1–2 |             |
| tds.tfluxMag_cNa  | sqrt(tds.tflux_cNar <sup>2</sup> +tds.tflux_cNaphi <sup>2</sup> +tds.tflux_cNaz <sup>2</sup> ) | mol/(m <sup>2</sup> ·s) | Total flux magnitude                  | Domains 1–2 |             |
| tds.dpflux_cNar   | 0                                                                                              | mol/(m <sup>2</sup> ·s) | Dispersive flux, r-component          | Domains 1–2 |             |
| tds.dpflux_cNaphi | 0                                                                                              | mol/(m <sup>2</sup> ·s) | Dispersive flux, phi-component        | Domains 1–2 |             |
| tds.dpflux_cNaz   | 0                                                                                              | mol/(m <sup>2</sup> ·s) | Dispersive flux, z-component          | Domains 1–2 |             |
| tds.mflux_cNar    | tds.z_cNa*F_const*cNa*(-tds.um_cNarr*d(tds.V,r)-tds.um_cNarz*d(tds.V,z))                       | mol/(m <sup>2</sup> ·s) | Electrophoretic flux, r-component     | Domains 1–2 |             |
| tds.mflux_cNaphi  | tds.z_cNa*F_const*cNa*(-tds.um_cNaphir*d(tds.V,r)-                                             | mol/(m <sup>2</sup> ·s) | Electrophoretic flux, phi-component   | Domains 1–2 |             |

| Name              | Expression                                                                         | Unit                    | Description                         | Selection   | Details     |
|-------------------|------------------------------------------------------------------------------------|-------------------------|-------------------------------------|-------------|-------------|
|                   | $tds.um\_cNaphiz*d(tds.V,z))$                                                      |                         |                                     |             |             |
| tds.mflux_cNaz    | $tds.z\_cNa*F\_const*cNa*(-tds.um\_cNazr*d(tds.V,r)-tds.um\_cNazr*d(tds.V,z))$     | mol/(m <sup>2</sup> ·s) | Electrophoretic flux, z-component   | Domains 1–2 |             |
| tds.mfluxMag_cNa  | $sqrt(tds.mflux\_cNar^2+tds.mflux\_cNaphi^2+tds.mflux\_cNaz^2)$                    | mol/(m <sup>2</sup> ·s) | Electrophoretic flux magnitude      | Domains 1–2 |             |
| tds.tflux_cClr    | $tds.dflux\_cClr+tds.mflux\_cClr$                                                  | mol/(m <sup>2</sup> ·s) | Total flux, r-component             | Domains 1–2 | + operation |
| tds.tflux_cClphi  | $tds.dflux\_cClphi+tds.mflux\_cClphi$                                              | mol/(m <sup>2</sup> ·s) | Total flux, phi-component           | Domains 1–2 | + operation |
| tds.tflux_cClz    | $tds.dflux\_cClz+tds.mflux\_cClz$                                                  | mol/(m <sup>2</sup> ·s) | Total flux, z-component             | Domains 1–2 | + operation |
| tds.dfluxMag_cCl  | $sqrt(tds.dflux\_cClr^2+tds.dflux\_cClphi^2+tds.dflux\_cClz^2)$                    | mol/(m <sup>2</sup> ·s) | Diffusive flux magnitude            | Domains 1–2 |             |
| tds.tfluxMag_cCl  | $sqrt(tds.tflux\_cClr^2+tds.tflux\_cClphi^2+tds.tflux\_cClz^2)$                    | mol/(m <sup>2</sup> ·s) | Total flux magnitude                | Domains 1–2 |             |
| tds.dpflux_cClr   | 0                                                                                  | mol/(m <sup>2</sup> ·s) | Dispersive flux, r-component        | Domains 1–2 |             |
| tds.dpflux_cClphi | 0                                                                                  | mol/(m <sup>2</sup> ·s) | Dispersive flux, phi-component      | Domains 1–2 |             |
| tds.dpflux_cClz   | 0                                                                                  | mol/(m <sup>2</sup> ·s) | Dispersive flux, z-component        | Domains 1–2 |             |
| tds.mflux_cClr    | $tds.z\_cCl*F\_const*cCl*(-tds.um\_cClrr*d(tds.V,r)-tds.um\_cClrz*d(tds.V,z))$     | mol/(m <sup>2</sup> ·s) | Electrophoretic flux, r-component   | Domains 1–2 |             |
| tds.mflux_cClphi  | $tds.z\_cCl*F\_const*cCl*(-tds.um\_cClphir*d(tds.V,r)-tds.um\_cClphiz*d(tds.V,z))$ | mol/(m <sup>2</sup> ·s) | Electrophoretic flux, phi-component | Domains 1–2 |             |
| tds.mflux_cClz    | $tds.z\_cCl*F\_const*cCl$                                                          | mol/(m <sup>2</sup> ·s) | Electrophoretic                     | Domains 1–2 |             |

| Name             | Expression                                                       | Unit                    | Description                           | Selection   | Details     |
|------------------|------------------------------------------------------------------|-------------------------|---------------------------------------|-------------|-------------|
|                  | $Cl^*(-tds.um\_cClzr*d(tds.V,r)-tds.um\_cClzz*d(tds.V,z))$       |                         | flux, z-component                     |             |             |
| tds.mfluxMag_cCl | $\sqrt{tds.mflux\_cClr^2+tds.mflux\_cClphi^2+tds.mflux\_cClz^2}$ | mol/(m <sup>2</sup> ·s) | Electrophoretic flux magnitude        | Domains 1–2 |             |
| tds.cNa_material | cNa*spatial.detF                                                 | mol/m <sup>3</sup>      | Concentration                         | Domains 1–2 |             |
| tds.dflux_cNar   | $-tds.D\_cNarr*cNar-tds.D\_cNarz*cNaz$                           | mol/(m <sup>2</sup> ·s) | Diffusive flux, r-component           | Domains 1–2 | + operation |
| tds.dflux_cNaphi | $-tds.D\_cNaphir*cNar-tds.D\_cNaphiz*cNaz$                       | mol/(m <sup>2</sup> ·s) | Diffusive flux, phi-component         | Domains 1–2 | + operation |
| tds.dflux_cNaz   | $-tds.D\_cNazr*cNar-tds.D\_cNazz*cNaz$                           | mol/(m <sup>2</sup> ·s) | Diffusive flux, z-component           | Domains 1–2 | + operation |
| tds.grad_cNar    | cNar                                                             | mol/m <sup>4</sup>      | Concentration gradient, r-component   | Domains 1–2 |             |
| tds.grad_cNaphi  | 0                                                                | mol/m <sup>4</sup>      | Concentration gradient, phi-component | Domains 1–2 |             |
| tds.grad_cNaz    | cNaz                                                             | mol/m <sup>4</sup>      | Concentration gradient, z-component   | Domains 1–2 |             |
| tds.cCl_material | cCl*spatial.detF                                                 | mol/m <sup>3</sup>      | Concentration                         | Domains 1–2 |             |
| tds.dflux_cClr   | $-tds.D\_cClrr*cClr-tds.D\_cClrz*cClz$                           | mol/(m <sup>2</sup> ·s) | Diffusive flux, r-component           | Domains 1–2 | + operation |
| tds.dflux_cClphi | $-tds.D\_cClpir*cClr-tds.D\_cClphiz*cClz$                        | mol/(m <sup>2</sup> ·s) | Diffusive flux, phi-component         | Domains 1–2 | + operation |
| tds.dflux_cClz   | $-tds.D\_cClzr*cClr-tds.D\_cClzz*cClz$                           | mol/(m <sup>2</sup> ·s) | Diffusive flux, z-component           | Domains 1–2 | + operation |
| tds.grad_cClr    | cClr                                                             | mol/m <sup>4</sup>      | Concentration gradient, r-component   | Domains 1–2 |             |
| tds.grad_cClphi  | 0                                                                | mol/m <sup>4</sup>      | Concentration gradient, phi-component | Domains 1–2 |             |
| tds.grad_cClz    | cClz                                                             | mol/m <sup>4</sup>      | Concentration                         | Domains 1–2 |             |

| Name             | Expression                      | Unit     | Description                | Selection   | Details |
|------------------|---------------------------------|----------|----------------------------|-------------|---------|
|                  |                                 |          | gradient, z-component      |             |         |
| tds.um_cNarr     | tds.D_cNarr/(R_const*tds.T)     | s-mol/kg | Mobility, rr-component     | Domains 1-2 |         |
| tds.um_cNaphir   | tds.D_cNaphir/(R_const*tds.T)   | s-mol/kg | Mobility, phir-component   | Domains 1-2 |         |
| tds.um_cNazr     | tds.D_cNazr/(R_const*tds.T)     | s-mol/kg | Mobility, zr-component     | Domains 1-2 |         |
| tds.um_cNarphi   | tds.D_cNarphi/(R_const*tds.T)   | s-mol/kg | Mobility, rphi-component   | Domains 1-2 |         |
| tds.um_cNaphiphi | tds.D_cNaphiphi/(R_const*tds.T) | s-mol/kg | Mobility, phiphi-component | Domains 1-2 |         |
| tds.um_cNazphi   | tds.D_cNazphi/(R_const*tds.T)   | s-mol/kg | Mobility, zphi-component   | Domains 1-2 |         |
| tds.um_cNarz     | tds.D_cNarz/(R_const*tds.T)     | s-mol/kg | Mobility, rz-component     | Domains 1-2 |         |
| tds.um_cNaphiz   | tds.D_cNaphiz/(R_const*tds.T)   | s-mol/kg | Mobility, phiz-component   | Domains 1-2 |         |
| tds.um_cNazz     | tds.D_cNazz/(R_const*tds.T)     | s-mol/kg | Mobility, zz-component     | Domains 1-2 |         |
| tds.um_cClrr     | tds.D_cClrr/(R_const*tds.T)     | s-mol/kg | Mobility, rr-component     | Domains 1-2 |         |
| tds.um_cClphir   | tds.D_cClphir/(R_const*tds.T)   | s-mol/kg | Mobility, phir-component   | Domains 1-2 |         |
| tds.um_cClzr     | tds.D_cClzr/(R_const*tds.T)     | s-mol/kg | Mobility, zr-component     | Domains 1-2 |         |
| tds.um_cClrphi   | tds.D_cClrphi/(R_const*tds.T)   | s-mol/kg | Mobility, rphi-component   | Domains 1-2 |         |
| tds.um_cClphiphi | tds.D_cClphiphi/(R_const*tds.T) | s-mol/kg | Mobility, phiphi-component | Domains 1-2 |         |
| tds.um_cClzphi   | tds.D_cClzphi/(R_const*tds.T)   | s-mol/kg | Mobility, zphi-component   | Domains 1-2 |         |
| tds.um_cClrz     | tds.D_cClrz/(R_const*tds.T)     | s-mol/kg | Mobility, rz-component     | Domains 1-2 |         |
| tds.um_cClphiz   | tds.D_cClphiz/(R_const*tds.T)   | s-mol/kg | Mobility, phiz-component   | Domains 1-2 |         |
| tds.um_cClzz     | tds.D_cClzz/(R_const*tds.T)     | s-mol/kg | Mobility, zz-component     | Domains 1-2 |         |
| tds.V            | model.input.V                   | V        | Electric potential         | Domains 1-2 | Meta    |
| tds.T            | tds.cdm1.mininput_temperature   | K        | Temperature                | Domains 1-2 |         |

| Name         | Expression                                                                                                                                                                                                                                                                                                                                                                                       | Unit                    | Description                    | Selection   | Details     |
|--------------|--------------------------------------------------------------------------------------------------------------------------------------------------------------------------------------------------------------------------------------------------------------------------------------------------------------------------------------------------------------------------------------------------|-------------------------|--------------------------------|-------------|-------------|
| tds.Rlin_cNa | 0                                                                                                                                                                                                                                                                                                                                                                                                | 1/s                     | Linear source term coefficient | Domains 1–2 | + operation |
| tds.Res_cNa  | $d(cNa*tds.z\_cNa*F\_const*(-tds.um\_cNarr*d(tds.V,r)-tds.um\_cNarz*d(tds.V,z)),r)+if(abs(r)<0.001*h\_spatial,d(cNa*tds.z\_cNa*F\_const*(-tds.um\_cNarr*d(tds.V,r)-tds.um\_cNarz*d(tds.V,z)),r),cNa*tds.z\_cNa*F\_const*(-tds.um\_cNarr*d(tds.V,r)-tds.um\_cNarz*d(tds.V,z)))/r)+d(cNa*tds.z\_cNa*F\_const*(-tds.um\_cNarz*d(tds.V,r)-tds.um\_cNazz*d(tds.V,z)),z)-cNa*tds.Rlin\_cNa-tds.R\_cNa$ | mol/(m <sup>3</sup> ·s) | Equation residual              | Domains 1–2 |             |
| tds.Rlin_cCl | 0                                                                                                                                                                                                                                                                                                                                                                                                | 1/s                     | Linear source term coefficient | Domains 1–2 | + operation |
| tds.Res_cCl  | $d(cCl*tds.z\_cCl*F\_const*(-tds.um\_cClrr*d(tds.V,r)-tds.um\_cClrz*d(tds.V,z)),r)+if(abs(r)<0.001*h\_spatial,d(cCl*tds.z\_cCl*F\_const*(-tds.um\_cClrr*d(tds.V,r)-tds.um\_cClrz*d(tds.V,z)),r),cCl*tds.z\_cCl*F\_const*(-tds.um\_cClrr*d(tds.V,r)-tds.um\_cClrz*d(tds.V,z)))/r)+d(cCl*tds.z\_cCl*F\_const*(-tds.um\_cClrz*d(tds.V,r)-tds.um\_cClzz*d(tds.V,z)),z)-cCl*tds.Rlin\_cCl-tds.R\_cCl$ | mol/(m <sup>3</sup> ·s) | Equation residual              | Domains 1–2 |             |

| Name | Expression                                                                                   | Unit | Description | Selection | Details |
|------|----------------------------------------------------------------------------------------------|------|-------------|-----------|---------|
|      | cCl*F_const*(-tds.um_cClzr*d(tds.V,r)-tds.um_cClzz*d(tds.V,z)),z)-cCl*tds.Rlin_cCl-tds.R_cCl |      |             |           |         |

### Shape functions

| Name | Shape function    | Unit               | Description   | Shape frame | Selection   |
|------|-------------------|--------------------|---------------|-------------|-------------|
| cNa  | Lagrange (Linear) | mol/m <sup>3</sup> | Concentration | Spatial     | Domains 1-2 |
| cCl  | Lagrange (Linear) | mol/m <sup>3</sup> | Concentration | Spatial     | Domains 1-2 |

### Weak Expressions

| Weak expression                                                                                                                                                  | Integration order | Integration frame | Selection   |
|------------------------------------------------------------------------------------------------------------------------------------------------------------------|-------------------|-------------------|-------------|
| 2*(tds.dflux_cNar*test(cNar)+tds.dflux_cNaz*test(cNaz))*tds.d*pi*r                                                                                               | 2                 | Spatial           | Domains 1-2 |
| 2*(tds.dflux_cClr*test(cClr)+tds.dflux_cClz*test(cClz))*tds.d*pi*r                                                                                               | 2                 | Spatial           | Domains 1-2 |
| 2*tds.z_cNa*F_const*cNa*((-tds.um_cNarr*d(tds.V,r)-tds.um_cNarz*d(tds.V,z))*test(cNar)+(-tds.um_cNazr*d(tds.V,r)-tds.um_cNazz*d(tds.V,z))*test(cNaz))*tds.d*pi*r | 2                 | Spatial           | Domains 1-2 |
| 2*tds.z_cCl*F_const*cCl*((-tds.um_cClrr*d(tds.V,r)-tds.um_cClrz*d(tds.V,z))*test(cClr)+(-tds.um_cClzr*d(tds.V,r)-tds.um_cClzz*d(tds.V,z))*test(cClz))*tds.d*pi*r | 2                 | Spatial           | Domains 1-2 |
| 2*tds.streamline*(isScalingSystemDomain==0)*tds.d*pi*r                                                                                                           | 2                 | Spatial           | Domains 1-2 |
| 2*tds.crosswind*(isScalingSystemDomain==0)*tds.d*pi*r                                                                                                            | 4                 | Spatial           | Domains 1-2 |

### 2.3.5 Axial Symmetry 1

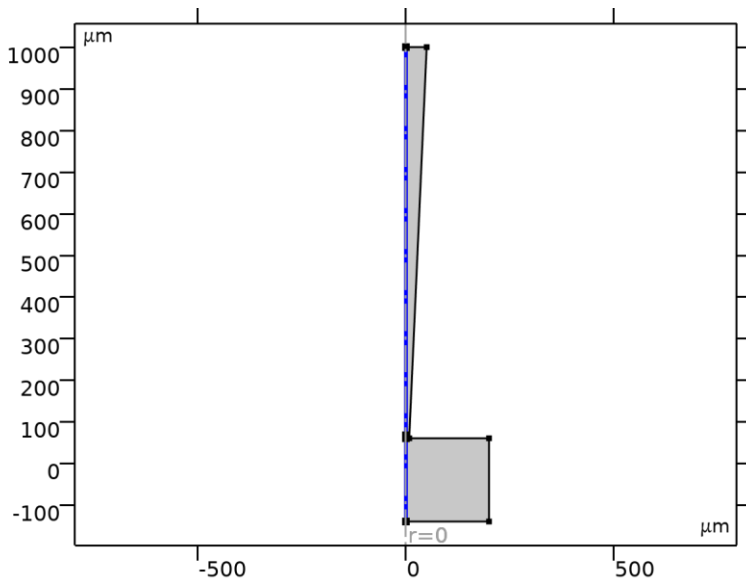

*Axial Symmetry 1*

#### SELECTION

|                        |                                             |
|------------------------|---------------------------------------------|
| Geometric entity level | Boundary                                    |
| Selection              | Geometry geom1: Dimension 1: All boundaries |

### 2.3.6 No Flux 1

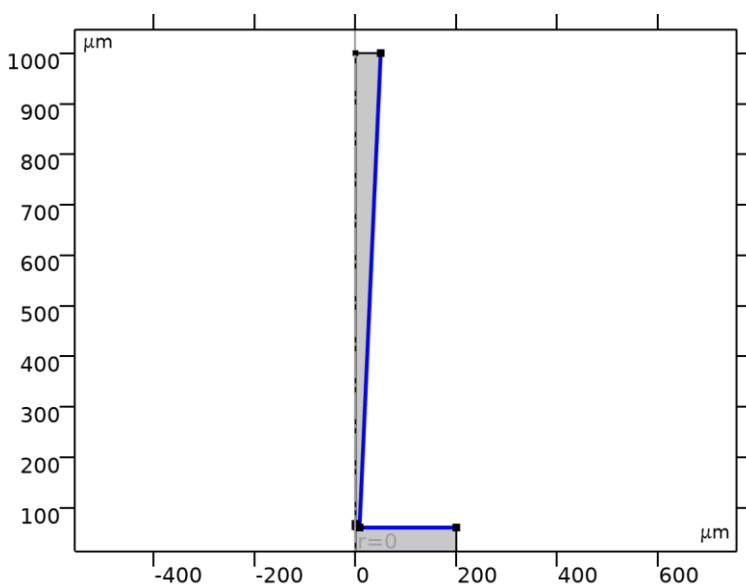

*No Flux 1*

#### SELECTION

|                        |          |
|------------------------|----------|
| Geometric entity level | Boundary |
|------------------------|----------|



|           |                                             |
|-----------|---------------------------------------------|
| Selection | Geometry geom1: Dimension 1: All boundaries |
|-----------|---------------------------------------------|

### EQUATIONS

$$-\mathbf{n} \cdot (\mathbf{J}_j + \mathbf{u}c_j) = 0$$

### Convection

#### SETTINGS

| Description | Value |
|-------------|-------|
| Include     | On    |

### 2.3.7 Initial Values 1

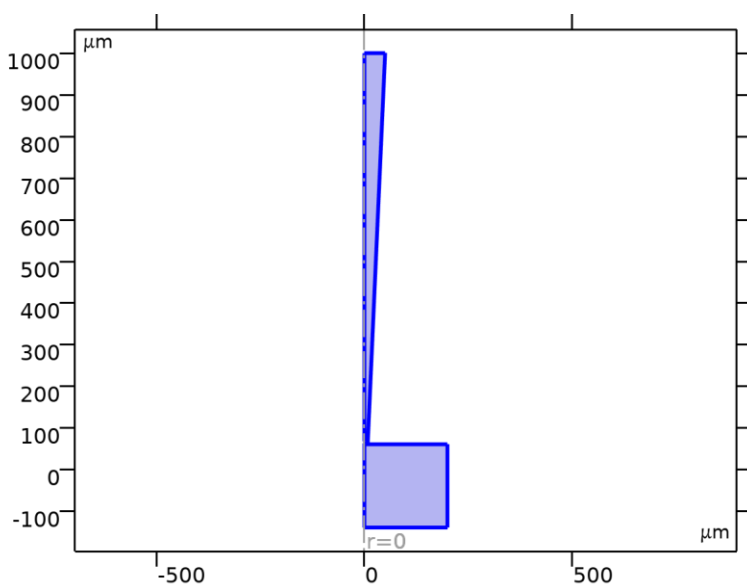

Initial Values 1

### SELECTION

|                        |                                          |
|------------------------|------------------------------------------|
| Geometric entity level | Domain                                   |
| Selection              | Geometry geom1: Dimension 2: All domains |

### Initial Values

#### SETTINGS

| Description   | Value      | Unit               |
|---------------|------------|--------------------|
| Concentration | {150, 150} | mol/m <sup>3</sup> |

### Variables

| Name       | Expression | Unit               | Description   | Selection   | Details     |
|------------|------------|--------------------|---------------|-------------|-------------|
| tds.c0_cNa | 150        | mol/m <sup>3</sup> | Concentration | Domains 1–2 | + operation |
| tds.c0_cCl | 150        | mol/m <sup>3</sup> | Concentration | Domains 1–2 | + operation |

### 2.3.8 Concentration 1

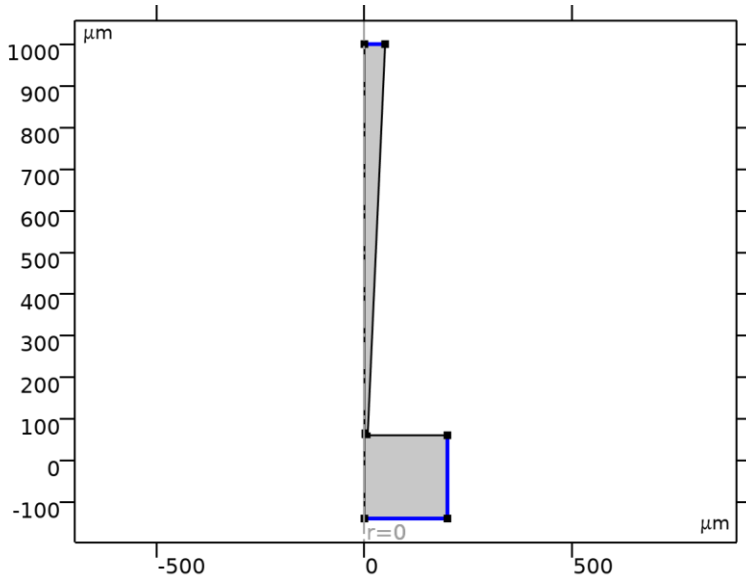

#### Concentration 1

##### SELECTION

|                        |                                                  |
|------------------------|--------------------------------------------------|
| Geometric entity level | Boundary                                         |
| Selection              | Geometry geom1: Dimension 1: Boundaries 2, 8, 12 |

##### EQUATIONS

$$c_i = c_{0j}$$

.....

#### Concentration

##### SETTINGS

| Description   | Value      | Unit               |
|---------------|------------|--------------------|
| Species cNa   | On         |                    |
| Species cCl   | On         |                    |
| Concentration | {150, 150} | mol/m <sup>3</sup> |

#### Variables

| Name                 | Expression                              | Unit               | Description            | Selection           | Details     |
|----------------------|-----------------------------------------|--------------------|------------------------|---------------------|-------------|
| tds.c0_cNa           | 150                                     | mol/m <sup>3</sup> | Concentration          | Boundaries 2, 8, 12 | + operation |
| tds.c0_cCl           | 150                                     | mol/m <sup>3</sup> | Concentration          | Boundaries 2, 8, 12 | + operation |
| tds.conc1.nmflow_cNa | tds.conc1.int(2*tds.ntflux_cNa*pi*r)*td | mol/s              | Normal molar flow rate | Global              |             |

| Name                 | Expression                                 | Unit  | Description            | Selection | Details |
|----------------------|--------------------------------------------|-------|------------------------|-----------|---------|
|                      | s.d                                        |       |                        |           |         |
| tds.conc1.nmflow_cCl | tds.conc1.int(2*tds.ntflux_cCl*pi*r)*tds.d | mol/s | Normal molar flow rate | Global    |         |

### Constraints

| Constraint               | Constraint force               | Shape function    | Selection           | Details   |
|--------------------------|--------------------------------|-------------------|---------------------|-----------|
| -tds.cVar_cNa+tds.c0_cNa | test(-tds.cVar_cNa+tds.c0_cNa) | Lagrange (Linear) | Boundaries 2, 8, 12 | Elemental |
| -tds.cVar_cCl+tds.c0_cCl | test(-tds.cVar_cCl+tds.c0_cCl) | Lagrange (Linear) | Boundaries 2, 8, 12 | Elemental |

## 2.4 ELECTROSTATICS

### USED PRODUCTS

COMSOL Multiphysics

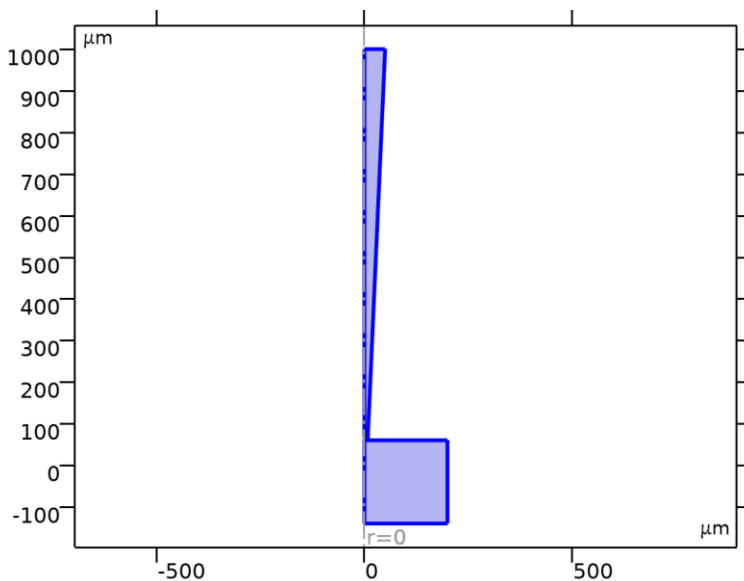

### Electrostatics

#### SELECTION

|                        |                                          |
|------------------------|------------------------------------------|
| Geometric entity level | Domain                                   |
| Selection              | Geometry geom1: Dimension 2: All domains |

#### EQUATIONS

$$\nabla \cdot \mathbf{D} = \rho_v$$

$$\mathbf{E} = -\nabla V$$

## 2.4.1 Interface Settings

### Discretization

#### SETTINGS

| Description        | Value     |
|--------------------|-----------|
| Electric potential | Quadratic |

### Manual Terminal Sweep Settings

#### SETTINGS

| Description               | Value | Unit     |
|---------------------------|-------|----------|
| Use manual terminal sweep | Off   |          |
| Reference impedance       | 50    | $\Omega$ |

## 2.4.2 Variables

| Name        | Expression | Unit | Description                       | Selection            | Details |
|-------------|------------|------|-----------------------------------|----------------------|---------|
| es.d        | 1          | 1    | Contribution                      | Domains 1–2          |         |
| es.nr       | nr         |      | Normal vector, r-component        | Boundary 4           |         |
| es.nphi     | 0          |      | Normal vector, phi-component      | Boundary 4           |         |
| es.nz       | nz         |      | Normal vector, z-component        | Boundary 4           |         |
| es.nr       | dnr        |      | Normal vector, r-component        | Boundaries 1–3, 5–12 |         |
| es.nphi     | 0          |      | Normal vector, phi-component      | Boundaries 1–3, 5–12 |         |
| es.nz       | dnz        |      | Normal vector, z-component        | Boundaries 1–3, 5–12 |         |
| es.nmeshr   | nrmesh     |      | Mesh normal vector, r-component   | Boundary 4           |         |
| es.nmeshphi | 0          |      | Mesh normal vector, phi-component | Boundary 4           |         |
| es.nmeshz   | nzmesh     |      | Mesh normal vector, z-component   | Boundary 4           |         |
| es.nmeshr   | dnrmesh    |      | Mesh normal vector, r-            | Boundaries 1–3, 5–12 |         |

| Name         | Expression                                                                                                                                                                                                                                          | Unit | Description                                             | Selection            | Details |
|--------------|-----------------------------------------------------------------------------------------------------------------------------------------------------------------------------------------------------------------------------------------------------|------|---------------------------------------------------------|----------------------|---------|
|              |                                                                                                                                                                                                                                                     |      | component                                               |                      |         |
| es.nmeshphi  | 0                                                                                                                                                                                                                                                   |      | Mesh normal vector, phi-component                       | Boundaries 1–3, 5–12 |         |
| es.nmeshz    | dnzmesh                                                                                                                                                                                                                                             |      | Mesh normal vector, z-component                         | Boundaries 1–3, 5–12 |         |
| es.unmeshr   | unrmesh                                                                                                                                                                                                                                             |      | Mesh normal vector, upside, r-component                 | Boundaries 1–12      |         |
| es.unmeshphi | 0                                                                                                                                                                                                                                                   |      | Mesh normal vector, upside, phi-component               | Boundaries 1–12      |         |
| es.unmeshz   | unzmesh                                                                                                                                                                                                                                             |      | Mesh normal vector, upside, z-component                 | Boundaries 1–12      |         |
| es.dnmeshr   | dnrmesh                                                                                                                                                                                                                                             |      | Mesh normal vector, downside, r-component               | Boundaries 1–12      |         |
| es.dnmeshphi | 0                                                                                                                                                                                                                                                   |      | Mesh normal vector, downside, phi-component             | Boundaries 1–12      |         |
| es.dnmeshz   | dnzmesh                                                                                                                                                                                                                                             |      | Mesh normal vector, downside, z-component               | Boundaries 1–12      |         |
| es.l_sRR     | $(\text{spatial.invF11} * (\text{spatial.invF11} * \text{es.l_srr} + \text{spatial.invF31} * \text{es.l_srz}) + \text{spatial.invF31} * (\text{spatial.invF11} * \text{es.l_srz} + \text{spatial.invF31} * \text{es.l_szz})) * \text{spatial.detF}$ | 1    | Spatial identity matrix, material frame, RR-component   | Domains 1–2          |         |
| es.l_sPHIR   | $\text{if}(\text{Rg} > 0.001 * \text{h}, \text{R}/\text{r}, \text{Rr}) * (\text{spatial.invF11} * \text{es.l_sphir} + \text{spatial.invF31} * \text{es.l_sphiz}) * \text{spatial.detF}$                                                             | 1    | Spatial identity matrix, material frame, PHIR-component | Domains 1–2          |         |
| es.l_sZR     | $(\text{spatial.invF11} * (\text{spatial.invF13} * \text{es.l_srr} + \text{spatial.invF33} * \text{es.l_srz}) + \text{spatial.invF31} * (\text{spatial.invF13} * \text{es.l_srz} + \text{spatial.invF33} * \text{es.l_szz})) * \text{spatial.detF}$ | 1    | Spatial identity matrix, material frame, ZR-component   | Domains 1–2          |         |

| Name         | Expression                                                                                                                                                                 | Unit | Description                                               | Selection   | Details |
|--------------|----------------------------------------------------------------------------------------------------------------------------------------------------------------------------|------|-----------------------------------------------------------|-------------|---------|
|              | $F33 * es.l\_szz) * spatial.detF$                                                                                                                                          |      |                                                           |             |         |
| es.l_sRPHI   | $if(Rg > 0.001 * h, R/r, Rr) * (spatial.invF11 * es.l\_srphi + spatial.invF31 * es.l\_szphi) * spatial.detF$                                                               | 1    | Spatial identity matrix, material frame, RPHI-component   | Domains 1–2 |         |
| es.l_sPHIPHI | $if(Rg > 0.001 * h, R/r, Rr) ^ 2 * es.l\_sphiphi * spatial.detF$                                                                                                           | 1    | Spatial identity matrix, material frame, PHIPHI-component | Domains 1–2 |         |
| es.l_sZPHI   | $if(Rg > 0.001 * h, R/r, Rr) * (spatial.invF13 * es.l\_srphi + spatial.invF33 * es.l\_szphi) * spatial.detF$                                                               | 1    | Spatial identity matrix, material frame, ZPHI-component   | Domains 1–2 |         |
| es.l_sRZ     | $(spatial.invF13 * (spatial.invF11 * es.l\_srr + spatial.invF31 * es.l\_szz) + spatial.invF33 * (spatial.invF11 * es.l\_srz + spatial.invF31 * es.l\_szz)) * spatial.detF$ | 1    | Spatial identity matrix, material frame, RZ-component     | Domains 1–2 |         |
| es.l_sPHIZ   | $if(Rg > 0.001 * h, R/r, Rr) * (spatial.invF13 * es.l\_spher + spatial.invF33 * es.l\_sphiz) * spatial.detF$                                                               | 1    | Spatial identity matrix, material frame, PHIZ-component   | Domains 1–2 |         |
| es.l_sZZ     | $(spatial.invF13 * (spatial.invF13 * es.l\_srr + spatial.invF33 * es.l\_szz) + spatial.invF33 * (spatial.invF13 * es.l\_srz + spatial.invF33 * es.l\_szz)) * spatial.detF$ | 1    | Spatial identity matrix, material frame, ZZ-component     | Domains 1–2 |         |
| es.l_srr     | 1                                                                                                                                                                          | 1    | Spatial identity matrix, rr-component                     | Domains 1–2 |         |
| es.l_spher   | 0                                                                                                                                                                          | 1    | Spatial identity matrix, phir-component                   | Domains 1–2 |         |
| es.l_srz     | 0                                                                                                                                                                          | 1    | Spatial identity matrix, zr-component                     | Domains 1–2 |         |
| es.l_srphi   | 0                                                                                                                                                                          | 1    | Spatial identity matrix, rphi-component                   | Domains 1–2 |         |

| Name       | Expression | Unit | Description                                           | Selection       | Details |
|------------|------------|------|-------------------------------------------------------|-----------------|---------|
| es.l_sphi  | 1          | 1    | Spatial identity matrix, phi-component                | Domains 1–2     |         |
| es.l_sphi  | 0          | 1    | Spatial identity matrix, zphi-component               | Domains 1–2     |         |
| es.l_srz   | 0          | 1    | Spatial identity matrix, rz-component                 | Domains 1–2     |         |
| es.l_sphiz | 0          | 1    | Spatial identity matrix, phiz-component               | Domains 1–2     |         |
| es.l_szz   | 1          | 1    | Spatial identity matrix, zz-component                 | Domains 1–2     |         |
| es.unTr    | es.unTer   | Pa   | Maxwell upward surface stress tensor, r-component     | Boundaries 1–12 |         |
| es.unTphi  | es.unTephi | Pa   | Maxwell upward surface stress tensor, phi-component   | Boundaries 1–12 |         |
| es.unTz    | es.unTez   | Pa   | Maxwell upward surface stress tensor, z-component     | Boundaries 1–12 |         |
| es.dnTr    | es.dnTer   | Pa   | Maxwell downward surface stress tensor, r-component   | Boundaries 1–12 |         |
| es.dnTphi  | es.dnTephi | Pa   | Maxwell downward surface stress tensor, phi-component | Boundaries 1–12 |         |
| es.dnTz    | es.dnTez   | Pa   | Maxwell downward surface stress tensor, z-component   | Boundaries 1–12 |         |
| es.unr     | unr        |      | Normal vector up direction, r-                        | Boundaries 1–   |         |

| Name       | Expression                                                                                                                                                                                                           | Unit | Description                                                  | Selection       | Details |
|------------|----------------------------------------------------------------------------------------------------------------------------------------------------------------------------------------------------------------------|------|--------------------------------------------------------------|-----------------|---------|
|            |                                                                                                                                                                                                                      |      | component                                                    | 12              |         |
| es.unphi   | 0                                                                                                                                                                                                                    |      | Normal vector up direction, phi-component                    | Boundaries 1–12 |         |
| es.unz     | unz                                                                                                                                                                                                                  |      | Normal vector up direction, z-component                      | Boundaries 1–12 |         |
| es.dnr     | dnr                                                                                                                                                                                                                  |      | Normal vector down direction, r-component                    | Boundaries 1–12 |         |
| es.dnphi   | 0                                                                                                                                                                                                                    |      | Normal vector down direction, phi-component                  | Boundaries 1–12 |         |
| es.dnz     | dnz                                                                                                                                                                                                                  |      | Normal vector down direction, z-component                    | Boundaries 1–12 |         |
| es.unTer   | -<br>0.5*es.dnr*(real(up(es.Dr))*real(up(es.Er))+real(up(es.Dphi))*real(up(es.Ephi))+real(up(es.Dz))*real(up(es.Ez)))+real(up(es.Dr))*(real(up(es.Er))*es.dnr+real(up(es.Ephi))*es.dnphi+real(up(es.Ez))*es.dnz)     | Pa   | Maxwell upward electric surface stress tensor, r-component   | Boundary 4      |         |
| es.unTephi | -<br>0.5*es.dnphi*(real(up(es.Dr))*real(up(es.Er))+real(up(es.Dphi))*real(up(es.Ephi))+real(up(es.Dz))*real(up(es.Ez)))+real(up(es.Dphi))*(real(up(es.Er))*es.dnr+real(up(es.Ephi))*es.dnphi+real(up(es.Ez))*es.dnz) | Pa   | Maxwell upward electric surface stress tensor, phi-component | Boundary 4      |         |
| es.unTez   | -<br>0.5*es.dnz*(real(up(es.Dr))*real(up(es.Er))+real(up(es.Dphi))*real(up(es.Ephi))+real(up(es.Dz))*real(up(es.Ez)))+real(up(es.Dz))*(real(up(es.Er))*es.dnr+real(up(es.Ephi))*es.dnphi+real(up(es.Ez))*es.dnz)     | Pa   | Maxwell upward electric surface stress tensor, z-component   | Boundary 4      |         |



| Name       | Expression                                                                                                                                                                                                                             | Unit | Description                                                    | Selection            | Details |
|------------|----------------------------------------------------------------------------------------------------------------------------------------------------------------------------------------------------------------------------------------|------|----------------------------------------------------------------|----------------------|---------|
|            | $(es.Ephi)*es.dnphi+real(up(es.Ez))*es.dnz)$                                                                                                                                                                                           |      |                                                                |                      |         |
| es.unTer   | 0                                                                                                                                                                                                                                      | Pa   | Maxwell upward electric surface stress tensor, r-component     | Boundaries 1–3, 5–12 |         |
| es.unTephi | 0                                                                                                                                                                                                                                      | Pa   | Maxwell upward electric surface stress tensor, phi-component   | Boundaries 1–3, 5–12 |         |
| es.unTez   | 0                                                                                                                                                                                                                                      | Pa   | Maxwell upward electric surface stress tensor, z-component     | Boundaries 1–3, 5–12 |         |
| es.dnTer   | $-0.5*es.unr*(real(down(es.Dr))*real(down(es.Er))+real(down(es.Dphi))*real(down(es.Ephi))+real(down(es.Dz))*real(down(es.Ez)))+real(down(es.Dr))*(real(down(es.Er))*es.unr+real(down(es.Ephi))*es.unphi+real(down(es.Ez))*es.unz)$     | Pa   | Maxwell downward electric surface stress tensor, r-component   | Boundaries 1–12      |         |
| es.dnTephi | $-0.5*es.unphi*(real(down(es.Dr))*real(down(es.Er))+real(down(es.Dphi))*real(down(es.Ephi))+real(down(es.Dz))*real(down(es.Ez)))+real(down(es.Dphi))*(real(down(es.Er))*es.unr+real(down(es.Ephi))*es.unphi+real(down(es.Ez))*es.unz)$ | Pa   | Maxwell downward electric surface stress tensor, phi-component | Boundaries 1–12      |         |
| es.dnTez   | $-0.5*es.unz*(real(down(es.Dr))*real(down(es.Er))+real(down(es.Dphi))*real(down(es.Ephi))+real(down(es.Dz))*real(down(es.Ez)))+real($                                                                                                  | Pa   | Maxwell downward electric surface stress tensor, z-component   | Boundaries 1–12      |         |

| Name     | Expression                                                                                   | Unit     | Description           | Selection | Details     |
|----------|----------------------------------------------------------------------------------------------|----------|-----------------------|-----------|-------------|
|          | down(es.Dz)*(real(down(es.Er))*es.unr+real(down(es.Ephi))*es.unphi+real(down(es.Ez))*es.unz) |          |                       |           |             |
| es.intWe | es.int_We(es.d*es.dWe)                                                                       | J        | Total electric energy | Global    | + operation |
| es.zref  | 50[ohm]                                                                                      | $\Omega$ | Reference impedance   | Global    |             |

### 2.4.3 Charge Conservation 1

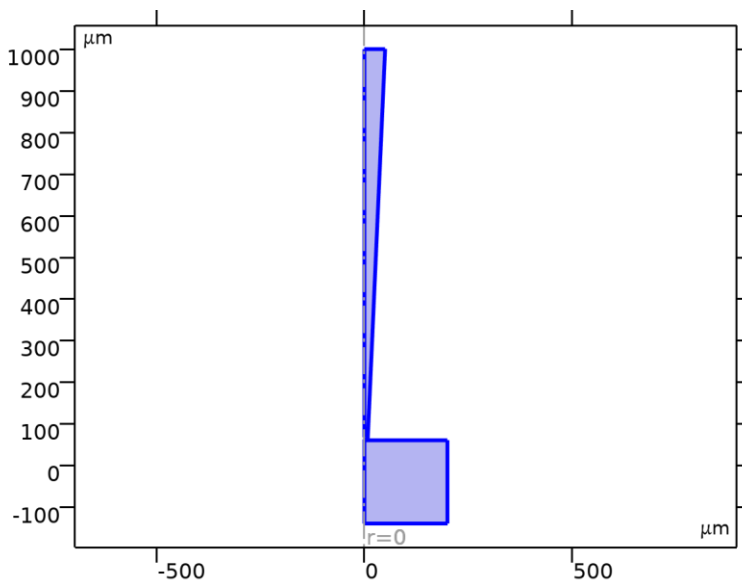

Charge Conservation 1

#### SELECTION

|                        |                                          |
|------------------------|------------------------------------------|
| Geometric entity level | Domain                                   |
| Selection              | Geometry geom1: Dimension 2: All domains |

#### EQUATIONS

$$\mathbf{E} = -\nabla V$$

$$\nabla \cdot (\epsilon_0 \epsilon_r \mathbf{E}) = \rho_v$$

#### Constitutive Relation D-E

##### SETTINGS

| Description           | Value                 |
|-----------------------|-----------------------|
| Dielectric model      | Relative permittivity |
| Relative permittivity | User defined          |

| Description           | Value |
|-----------------------|-------|
| Relative permittivity | 81    |

## Coordinate System Selection

### SETTINGS

| Description       | Value                    |
|-------------------|--------------------------|
| Coordinate system | Global coordinate system |

## Variables

| Name              | Expression | Unit             | Description                             | Selection       | Details     |
|-------------------|------------|------------------|-----------------------------------------|-----------------|-------------|
| es.nD             | 0          | C/m <sup>2</sup> | Surface charge density                  | Boundaries 1–12 | + operation |
| es.epsilonrrr     | 81         | 1                | Relative permittivity, rr-component     | Domains 1–2     |             |
| es.epsilonrphir   | 0          | 1                | Relative permittivity, phir-component   | Domains 1–2     |             |
| es.epsilonrzz     | 0          | 1                | Relative permittivity, zr-component     | Domains 1–2     |             |
| es.epsilonrrphi   | 0          | 1                | Relative permittivity, rphi-component   | Domains 1–2     |             |
| es.epsilonrphiphi | 81         | 1                | Relative permittivity, phiphi-component | Domains 1–2     |             |
| es.epsilonrzphi   | 0          | 1                | Relative permittivity, zphi-component   | Domains 1–2     |             |
| es.epsilonrrz     | 0          | 1                | Relative permittivity, rz-component     | Domains 1–2     |             |
| es.epsilonrphiz   | 0          | 1                | Relative permittivity, phiz-component   | Domains 1–2     |             |
| es.epsilonrzz     | 81         | 1                | Relative permittivity, zz-component     | Domains 1–2     |             |
| es.epsilonr_iso   | 81         | 1                | Relative permittivity, isotropic value  | Domains 1–2     |             |

| Name     | Expression                                                                                                                                                                                                                                                                    | Unit             | Description                                   | Selection   | Details |
|----------|-------------------------------------------------------------------------------------------------------------------------------------------------------------------------------------------------------------------------------------------------------------------------------|------------------|-----------------------------------------------|-------------|---------|
| es.DrR   | 0                                                                                                                                                                                                                                                                             | C/m <sup>2</sup> | Remanent electric displacement, R-component   | Domains 1–2 |         |
| es.DrPHI | 0                                                                                                                                                                                                                                                                             | C/m <sup>2</sup> | Remanent electric displacement, PHI-component | Domains 1–2 |         |
| es.DrZ   | 0                                                                                                                                                                                                                                                                             | C/m <sup>2</sup> | Remanent electric displacement, Z-component   | Domains 1–2 |         |
| es.Dr    | $\epsilon_0 \text{const} \cdot \text{es.l\_srr} \cdot \text{es.Er} + \epsilon_0 \text{const} \cdot \text{es.l\_srphi} \cdot \text{es.Ephi} + \epsilon_0 \text{const} \cdot \text{es.l\_srz} \cdot \text{es.Ez} + \text{es.Pr} + \text{es.Per} + \text{es.Phr}$                | C/m <sup>2</sup> | Electric displacement field, r-component      | Domains 1–2 |         |
| es.Dphi  | $\epsilon_0 \text{const} \cdot \text{es.l\_spher} \cdot \text{es.Er} + \epsilon_0 \text{const} \cdot \text{es.l\_spherphi} \cdot \text{es.Ephi} + \epsilon_0 \text{const} \cdot \text{es.l\_spherz} \cdot \text{es.Ez} + \text{es.Pphi} + \text{es.Pephi} + \text{es.Pphphi}$ | C/m <sup>2</sup> | Electric displacement field, phi-component    | Domains 1–2 |         |
| es.Dz    | $\epsilon_0 \text{const} \cdot \text{es.l\_sizr} \cdot \text{es.Er} + \epsilon_0 \text{const} \cdot \text{es.l\_sizrphi} \cdot \text{es.Ephi} + \epsilon_0 \text{const} \cdot \text{es.l\_sizz} \cdot \text{es.Ez} + \text{es.Pz} + \text{es.Pez} + \text{es.Phz}$            | C/m <sup>2</sup> | Electric displacement field, z-component      | Domains 1–2 |         |
| es.Pr    | $\epsilon_0 \text{const} \cdot (\text{es.chirr} \cdot \text{es.Er} + \text{es.chirphi} \cdot \text{es.Ephi} + \text{es.chirz} \cdot \text{es.Ez})$                                                                                                                            | C/m <sup>2</sup> | Polarization, r-component                     | Domains 1–2 |         |
| es.Pphi  | $\epsilon_0 \text{const} \cdot (\text{es.chiphir} \cdot \text{es.Er} + \text{es.chiphphi} \cdot \text{es.Ephi} + \text{es.chiphz} \cdot \text{es.Ez})$                                                                                                                        | C/m <sup>2</sup> | Polarization, phi-component                   | Domains 1–2 |         |
| es.Pz    | $\epsilon_0 \text{const} \cdot (\text{es.chizr} \cdot \text{es.Er} + \text{es.chizrphi} \cdot \text{es.Ephi} + \text{es.chizz} \cdot \text{es.Ez})$                                                                                                                           | C/m <sup>2</sup> | Polarization, z-component                     | Domains 1–2 |         |
| es.normD | $\sqrt{\text{realdot}(\text{es.Dr}, \text{es.Dr})}$                                                                                                                                                                                                                           | C/m <sup>2</sup> | Electric                                      | Domains 1–2 |         |

| Name        | Expression                                                                                                                                              | Unit                  | Description                                 | Selection   | Details     |
|-------------|---------------------------------------------------------------------------------------------------------------------------------------------------------|-----------------------|---------------------------------------------|-------------|-------------|
|             | $\text{Dr} + \text{realdot}(\text{es.Dphi}, \text{es.Dphi}) + \text{realdot}(\text{es.Dz}, \text{es.Dz})$                                               |                       | displacement field norm                     |             |             |
| es.normP    | $\text{sqrt}(\text{realdot}(\text{es.Pr}, \text{es.Pr}) + \text{realdot}(\text{es.Pphi}, \text{es.Pphi}) + \text{realdot}(\text{es.Pz}, \text{es.Pz}))$ | $\text{C}/\text{m}^2$ | Polarization norm                           | Domains 1–2 |             |
| es.Per      | 0                                                                                                                                                       | $\text{C}/\text{m}^2$ | Polarization contribution, r-component      | Domains 1–2 | + operation |
| es.Pephi    | 0                                                                                                                                                       | $\text{C}/\text{m}^2$ | Polarization contribution, phi-component    | Domains 1–2 | + operation |
| es.Pez      | 0                                                                                                                                                       | $\text{C}/\text{m}^2$ | Polarization contribution, z-component      | Domains 1–2 | + operation |
| es.Phr      | 0                                                                                                                                                       | $\text{C}/\text{m}^2$ | Polarization contribution, r-component      | Domains 1–2 | + operation |
| es.Phphi    | 0                                                                                                                                                       | $\text{C}/\text{m}^2$ | Polarization contribution, phi-component    | Domains 1–2 | + operation |
| es.Phz      | 0                                                                                                                                                       | $\text{C}/\text{m}^2$ | Polarization contribution, z-component      | Domains 1–2 | + operation |
| es.chirr    | $-1 + \text{es.epsilonrrr}$                                                                                                                             | 1                     | Electric susceptibility, rr-component       | Domains 1–2 |             |
| es.chiphir  | $\text{es.epsilonrphir}$                                                                                                                                | 1                     | Electric susceptibility, phir-component     | Domains 1–2 |             |
| es.chizr    | $\text{es.epsilonr zr}$                                                                                                                                 | 1                     | Electric susceptibility, zr-component       | Domains 1–2 |             |
| es.chirphi  | $\text{es.epsilonrrphi}$                                                                                                                                | 1                     | Electric susceptibility, rphi-component     | Domains 1–2 |             |
| es.chiphphi | $-1 + \text{es.epsilonrphiphphi}$                                                                                                                       | 1                     | Electric susceptibility, phiphphi-component | Domains 1–2 |             |
| es.chizphi  | $\text{es.epsilonr zphi}$                                                                                                                               | 1                     | Electric susceptibility,                    | Domains 1–2 |             |

| Name       | Expression                                                                                                                                        | Unit             | Description                              | Selection       | Details     |
|------------|---------------------------------------------------------------------------------------------------------------------------------------------------|------------------|------------------------------------------|-----------------|-------------|
|            |                                                                                                                                                   |                  | zphi-component                           |                 |             |
| es.chirz   | es.epsilonrrz                                                                                                                                     | 1                | Electric susceptibility, rz-component    | Domains 1–2     |             |
| es.chiphiz | es.epsilonrphiz                                                                                                                                   | 1                | Electric susceptibility, phiz-component  | Domains 1–2     |             |
| es.chizz   | -1+es.epsilonrzz                                                                                                                                  | 1                | Electric susceptibility, zz-component    | Domains 1–2     |             |
| es.Er      | -Vr                                                                                                                                               | V/m              | Electric field, r-component              | Domains 1–2     |             |
| es.Ephi    | 0                                                                                                                                                 | V/m              | Electric field, phi-component            | Domains 1–2     |             |
| es.Ez      | -Vz                                                                                                                                               | V/m              | Electric field, z-component              | Domains 1–2     |             |
| es.tEr     | -VTr                                                                                                                                              | V/m              | Tangential electric field, r-component   | Boundaries 1–12 |             |
| es.tEphi   | 0                                                                                                                                                 | V/m              | Tangential electric field, phi-component | Boundaries 1–12 |             |
| es.tEz     | -VTz                                                                                                                                              | V/m              | Tangential electric field, z-component   | Boundaries 1–12 |             |
| es.normE   | $\sqrt{\text{realdot}(\text{es.Er}, \text{es.Er}) + \text{realdot}(\text{es.Ephi}, \text{es.Ephi}) + \text{realdot}(\text{es.Ez}, \text{es.Ez})}$ | V/m              | Electric field norm                      | Domains 1–2     |             |
| es.Jr      | es.Jdr                                                                                                                                            | A/m <sup>2</sup> | Current density, r-component             | Domains 1–2     | + operation |
| es.Jphi    | es.Jdphi                                                                                                                                          | A/m <sup>2</sup> | Current density, phi-component           | Domains 1–2     | + operation |
| es.Jz      | es.Jdz                                                                                                                                            | A/m <sup>2</sup> | Current density, z-component             | Domains 1–2     | + operation |
| es.JR      | $(\text{spatial.invF11} * \text{es.Jdr} + \text{spatial.invF31} * \text{es.Jdz}) * \text{spatial.detF}$                                           | A/m <sup>2</sup> | Current density, R-component             | Domains 1–2     | + operation |
| es.JPHI    | $\text{if}(\text{Rg} > 0.001 * \text{h}, \text{R}/\text{r}, \text{Rr}) * \text{es.Jdphi} * \text{spatial.detF}$                                   | A/m <sup>2</sup> | Current density, PHI-component           | Domains 1–2     | + operation |
| es.JZ      | $\text{spatial.invF13} * \text{es.Jdr}$                                                                                                           | A/m <sup>2</sup> | Current density,                         | Domains 1–2     | + operation |

| Name       | Expression                                                                                                                                                                                                                                                                                                                                                                                                                                                                                                                                                                                                                              | Unit             | Description                                 | Selection            | Details     |
|------------|-----------------------------------------------------------------------------------------------------------------------------------------------------------------------------------------------------------------------------------------------------------------------------------------------------------------------------------------------------------------------------------------------------------------------------------------------------------------------------------------------------------------------------------------------------------------------------------------------------------------------------------------|------------------|---------------------------------------------|----------------------|-------------|
|            | $+ \text{spatial.invf33} * \text{es.Jdz} * \text{spatial.detF}$                                                                                                                                                                                                                                                                                                                                                                                                                                                                                                                                                                         |                  | Z-component                                 |                      |             |
| es.Jdr     | 0                                                                                                                                                                                                                                                                                                                                                                                                                                                                                                                                                                                                                                       | A/m <sup>2</sup> | Displacement current density, r-component   | Domains 1–2          |             |
| es.Jdphi   | 0                                                                                                                                                                                                                                                                                                                                                                                                                                                                                                                                                                                                                                       | A/m <sup>2</sup> | Displacement current density, phi-component | Domains 1–2          |             |
| es.Jdz     | 0                                                                                                                                                                                                                                                                                                                                                                                                                                                                                                                                                                                                                                       | A/m <sup>2</sup> | Displacement current density, z-component   | Domains 1–2          |             |
| es.normJ   | $\text{sqrt}(\text{realdot}(\text{es.Jr}, \text{es.Jr}) + \text{realdot}(\text{es.Jphi}, \text{es.Jphi}) + \text{realdot}(\text{es.Jz}, \text{es.Jz}))$                                                                                                                                                                                                                                                                                                                                                                                                                                                                                 | A/m <sup>2</sup> | Current density norm                        | Domains 1–2          |             |
| es.ccn1.nJ | $\text{es.unr} * \text{down}(\text{es.Jr}) + \text{es.unphi} * \text{down}(\text{es.Jphi}) + \text{es.unz} * \text{down}(\text{es.Jz})$                                                                                                                                                                                                                                                                                                                                                                                                                                                                                                 | A/m <sup>2</sup> | Inward current density                      | Boundaries 1–3, 5–12 |             |
| es.W       | es.We                                                                                                                                                                                                                                                                                                                                                                                                                                                                                                                                                                                                                                   | J/m <sup>3</sup> | Energy density                              | Domains 1–2          | + operation |
| es.dWe     | $2 * \text{es.We} * \text{pi} * \text{r}$                                                                                                                                                                                                                                                                                                                                                                                                                                                                                                                                                                                               | J/m <sup>2</sup> | Integrand for total electric energy         | Domains 1–2          | Meta        |
| es.We      | $0.5 * \text{epsilon0\_const} * ((\text{es.l\_srr} + \text{es.chirr}) * \text{es.Er} + (\text{es.l\_srphi} + \text{es.chirphi}) * \text{es.Ephi} + (\text{es.l\_srz} + \text{es.chirz}) * \text{es.Ez}) * \text{es.Er} + ((\text{es.l\_spher} + \text{es.chiper}) * \text{es.Er} + (\text{es.l\_spherphi} + \text{es.chiperphi}) * \text{es.Ephi} + (\text{es.l\_spherz} + \text{es.chiperz}) * \text{es.Ez}) * \text{es.Ephi} + ((\text{es.l\_spherz} + \text{es.chiperz}) * \text{es.Er} + (\text{es.l\_spherphi} + \text{es.chiperphi}) * \text{es.Ephi} + (\text{es.l\_spherz} + \text{es.chiperz}) * \text{es.Ez}) * \text{es.Ez}$ | J/m <sup>3</sup> | Electric energy density                     | Domains 1–2          |             |

### Shape functions

| Name | Shape function       | Unit | Description        | Shape frame | Selection   |
|------|----------------------|------|--------------------|-------------|-------------|
| V    | Lagrange (Quadratic) | V    | Electric potential | Spatial     | Domains 1–2 |
| V    | Lagrange (Quadratic) | V    | Electric potential | Material    | Domains 1–2 |

| Name | Shape function       | Unit | Description        | Shape frame | Selection   |
|------|----------------------|------|--------------------|-------------|-------------|
| V    | Lagrange (Quadratic) | V    | Electric potential | Geometry    | Domains 1–2 |
| V    | Lagrange (Quadratic) | V    | Electric potential | Mesh        | Domains 1–2 |

### Weak Expressions

| Weak expression                                      | Integration order | Integration frame | Selection   |
|------------------------------------------------------|-------------------|-------------------|-------------|
| -<br>2*(es.Dr*test(Vr)+es.Dz*test(Vz))*es.<br>d*pi*r | 4                 | Spatial           | Domains 1–2 |

### 2.4.4 Axial Symmetry 1

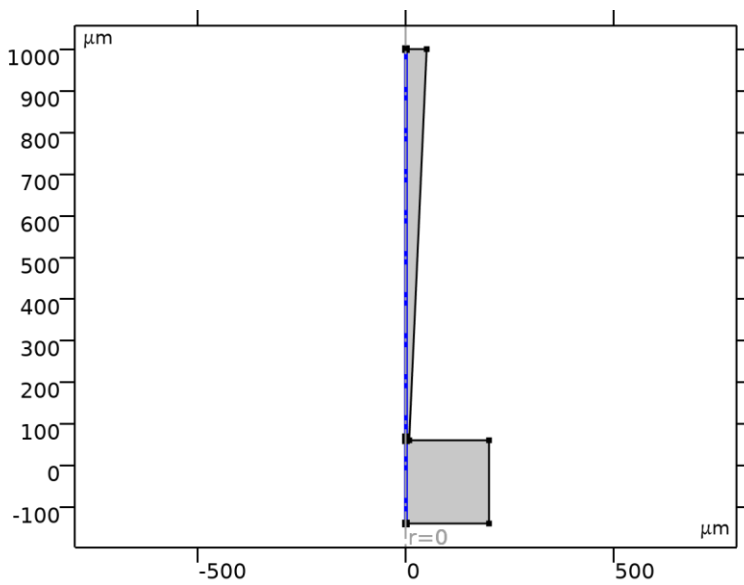

#### Axial Symmetry 1

##### SELECTION

|                        |                                             |
|------------------------|---------------------------------------------|
| Geometric entity level | Boundary                                    |
| Selection              | Geometry geom1: Dimension 1: All boundaries |



## 2.4.5 Zero Charge 1

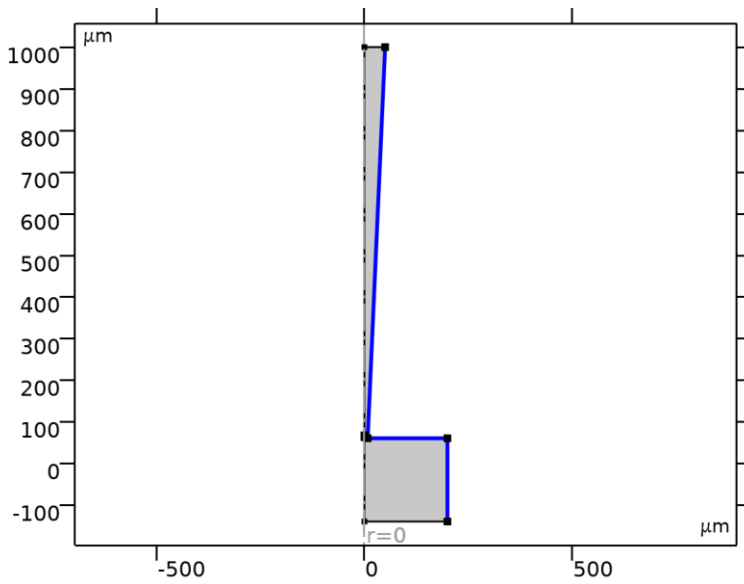

### Zero Charge 1

#### SELECTION

|                        |                                             |
|------------------------|---------------------------------------------|
| Geometric entity level | Boundary                                    |
| Selection              | Geometry geom1: Dimension 1: All boundaries |

#### EQUATIONS

$$\mathbf{n} \cdot \mathbf{D} = 0$$

#### Variables

| Name  | Expression | Unit             | Description            | Selection             | Details     |
|-------|------------|------------------|------------------------|-----------------------|-------------|
| es.nD | 0          | C/m <sup>2</sup> | Surface charge density | Boundaries 5, 7, 9–12 | + operation |

#### Shape functions

| Name | Shape function       | Unit | Description        | Shape frame | Selection     | Details |
|------|----------------------|------|--------------------|-------------|---------------|---------|
| V    | Lagrange (Quadratic) | V    | Electric potential | Spatial     | No boundaries | Slit    |
| V    | Lagrange (Quadratic) | V    | Electric potential | Material    | No boundaries | Slit    |
| V    | Lagrange (Quadratic) | V    | Electric potential | Geometry    | No boundaries | Slit    |
| V    | Lagrange (Quadratic) | V    | Electric potential | Mesh        | No boundaries | Slit    |

## 2.4.6 Initial Values 1

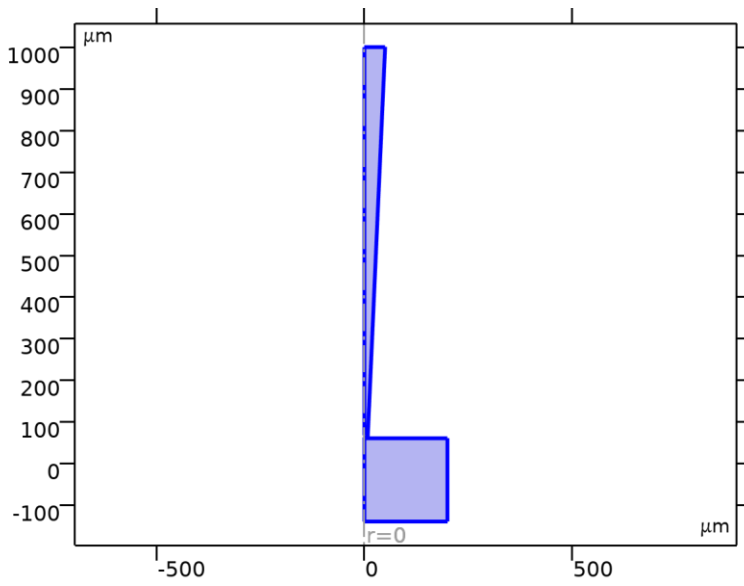

*Initial Values 1*

### SELECTION

|                        |                                          |
|------------------------|------------------------------------------|
| Geometric entity level | Domain                                   |
| Selection              | Geometry geom1: Dimension 2: All domains |

### SETTINGS

| Description        | Value | Unit |
|--------------------|-------|------|
| Electric potential | 0     | V    |

## 2.4.7 Electric Potential 1

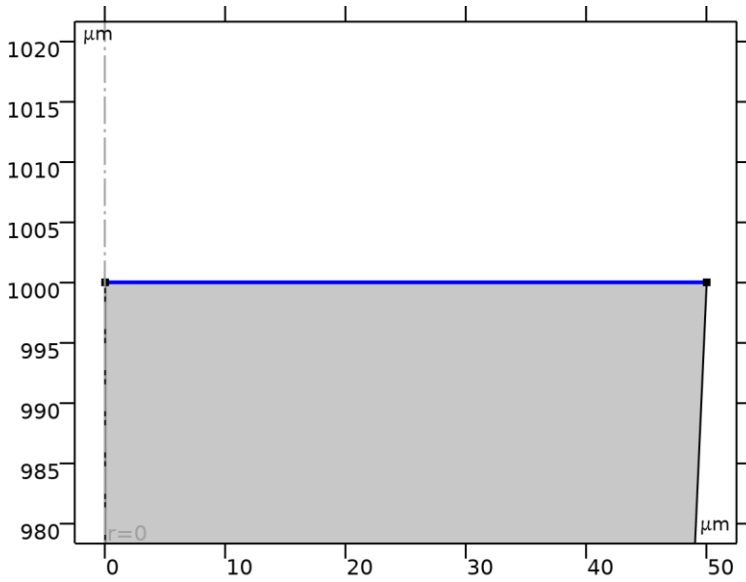

*Electric Potential 1*

### SELECTION

|                        |                                         |
|------------------------|-----------------------------------------|
| Geometric entity level | Boundary                                |
| Selection              | Geometry geom1: Dimension 1: Boundary 8 |

### EQUATIONS

$$V = V_0$$

### Electric Potential

#### SETTINGS

| Description        | Value | Unit |
|--------------------|-------|------|
| Electric potential | 0.1   | V    |

### Variables

| Name  | Expression                                                   | Unit             | Description            | Selection  | Details     |
|-------|--------------------------------------------------------------|------------------|------------------------|------------|-------------|
| es.nD | es.unr*down(es.Dr)+es.unphi*down(es.Dphi)+es.unz*down(es.Dz) | C/m <sup>2</sup> | Surface charge density | Boundary 8 | + operation |
| es.V0 | 0.1                                                          | V                | Electric potential     | Boundary 8 |             |

### Constraints

| Constraint | Constraint force | Shape function       | Selection  | Details   |
|------------|------------------|----------------------|------------|-----------|
| es.V0-V    | test(es.V0-V)    | Lagrange (Quadratic) | Boundary 8 | Elemental |

## 2.4.8 Ground 1

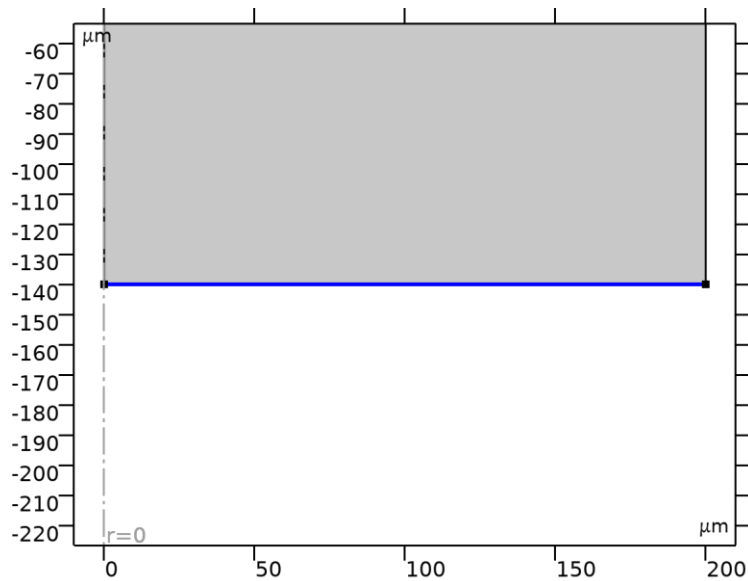

Ground 1

### SELECTION

|                        |                                         |
|------------------------|-----------------------------------------|
| Geometric entity level | Boundary                                |
| Selection              | Geometry geom1: Dimension 1: Boundary 2 |

### EQUATIONS

$$V = 0.$$

### Variables

| Name  | Expression                                                                                                | Unit             | Description            | Selection  | Details     |
|-------|-----------------------------------------------------------------------------------------------------------|------------------|------------------------|------------|-------------|
| es.nD | $es.unr \cdot \text{down}(es.Dr) + es.unphi \cdot \text{down}(es.Dphi) + es.unz \cdot \text{down}(es.Dz)$ | C/m <sup>2</sup> | Surface charge density | Boundary 2 | + operation |

### Constraints

| Constraint | Constraint force | Shape function       | Selection  | Details   |
|------------|------------------|----------------------|------------|-----------|
| -V         | test(-V)         | Lagrange (Quadratic) | Boundary 2 | Elemental |

## 2.4.9 Space Charge Density 1



Space Charge Density 1

### SELECTION

|                        |                                          |
|------------------------|------------------------------------------|
| Geometric entity level | Domain                                   |
| Selection              | Geometry geom1: Dimension 2: Domains 1–2 |

### EQUATIONS

$$\nabla \cdot \mathbf{D} = \rho_v$$

### Coordinate System Selection

#### SETTINGS

| Description       | Value                    |
|-------------------|--------------------------|
| Coordinate system | Global coordinate system |

### Variables

| Name         | Expression             | Unit             | Description          | Selection   | Details     |
|--------------|------------------------|------------------|----------------------|-------------|-------------|
| es.scd1.rhoq | (cNa-cCl)*96480[C/mol] | C/m <sup>3</sup> | Space charge density | Domains 1–2 |             |
| es.rhoq      | es.scd1.rhoq           | C/m <sup>3</sup> | Space charge density | Domains 1–2 | + operation |

### Weak Expressions

| Weak expression                   | Integration order | Integration frame | Selection   |
|-----------------------------------|-------------------|-------------------|-------------|
| -2*es.scd1.rhoq*test(V)*es.d*pi*r | 4                 | Spatial           | Domains 1–2 |

## 2.5 MESH 1

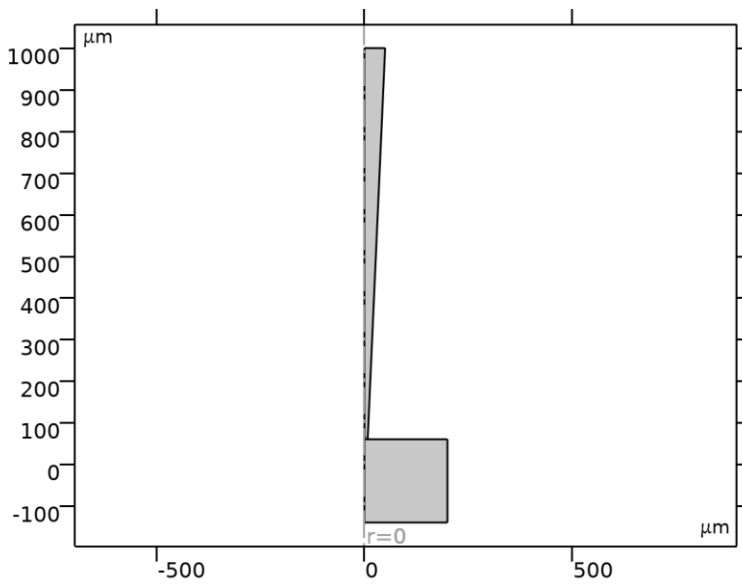

Mesh 1

### MESH STATISTICS

| Description   | Value      |
|---------------|------------|
| Status        | Empty mesh |
| Mesh vertices | 0          |

### 2.5.1 Size (size)

#### SETTINGS

| Description                 | Value          |
|-----------------------------|----------------|
| Calibrate for               | Fluid dynamics |
| Maximum element size        | 1.34           |
| Minimum element size        | 0.004          |
| Curvature factor            | 0.2            |
| Maximum element growth rate | 1.05           |
| Predefined size             | Extremely fine |

### 2.5.2 Free Triangular 1 (ftri1)

#### SELECTION

|                        |                |
|------------------------|----------------|
| Geometric entity level | Domain         |
| Selection              | Geometry geom1 |

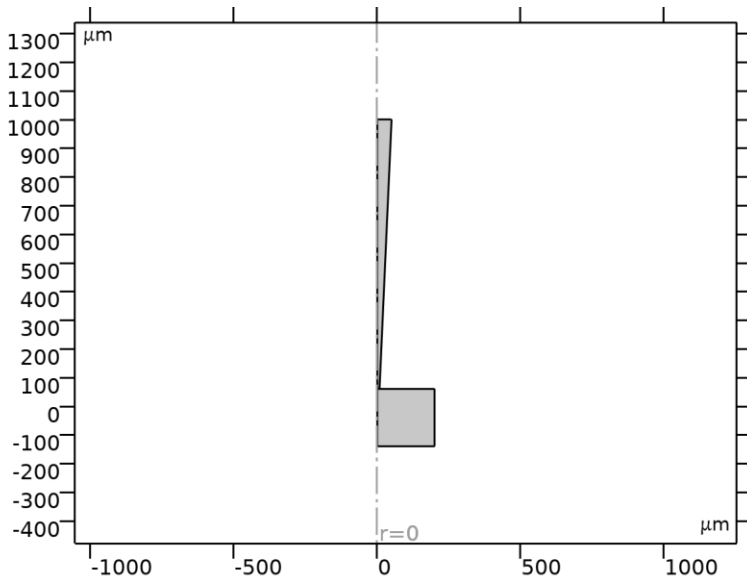

Free Triangular 1

INFORMATION

| Description     | Value     |
|-----------------|-----------|
| Last build time | Not built |

Size 1 (size1)

SELECTION

|                        |                |
|------------------------|----------------|
| Geometric entity level | Domain         |
| Selection              | Geometry geom1 |

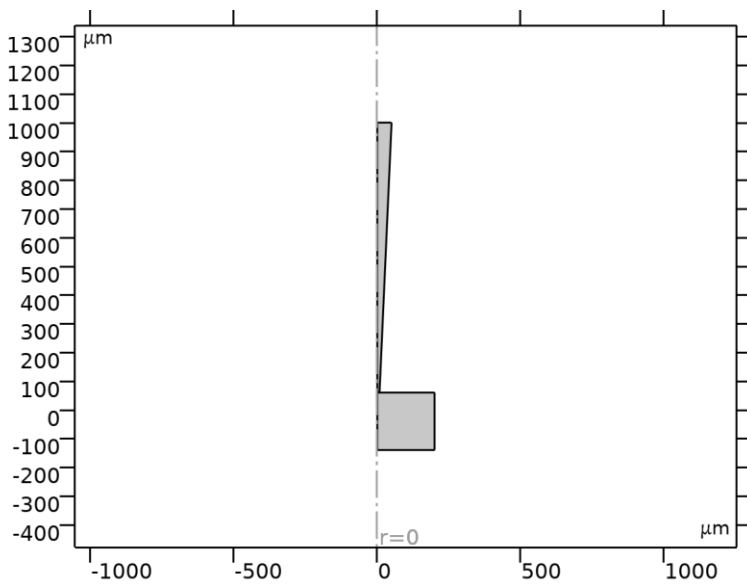

Size 1

### SETTINGS

| Description                 | Value          |
|-----------------------------|----------------|
| Calibrate for               | Fluid dynamics |
| Maximum element size        | 1.34           |
| Minimum element size        | 0.004          |
| Curvature factor            | 0.2            |
| Maximum element growth rate | 1.05           |
| Predefined size             | Extremely fine |

### Size 2 (size2)

#### SELECTION

|                        |                                                   |
|------------------------|---------------------------------------------------|
| Geometric entity level | Boundary                                          |
| Selection              | Geometry geom1: Dimension 1: Boundaries 4–5, 7, 9 |

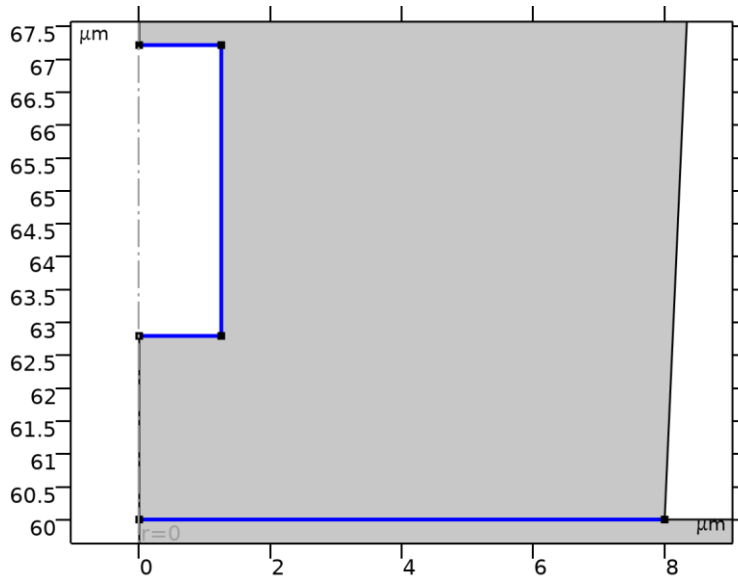

### Size 2

#### SETTINGS

| Description                 | Value          |
|-----------------------------|----------------|
| Calibrate for               | Semiconductor  |
| Maximum element size        | 0.456          |
| Minimum element size        | 0.0912         |
| Curvature factor            | 0.2            |
| Maximum element growth rate | 1.05           |
| Predefined size             | Extremely fine |



### Corner Refinement 1 (cr1)

#### SELECTION

|                        |                |
|------------------------|----------------|
| Geometric entity level | Domain         |
| Selection              | Geometry geom1 |

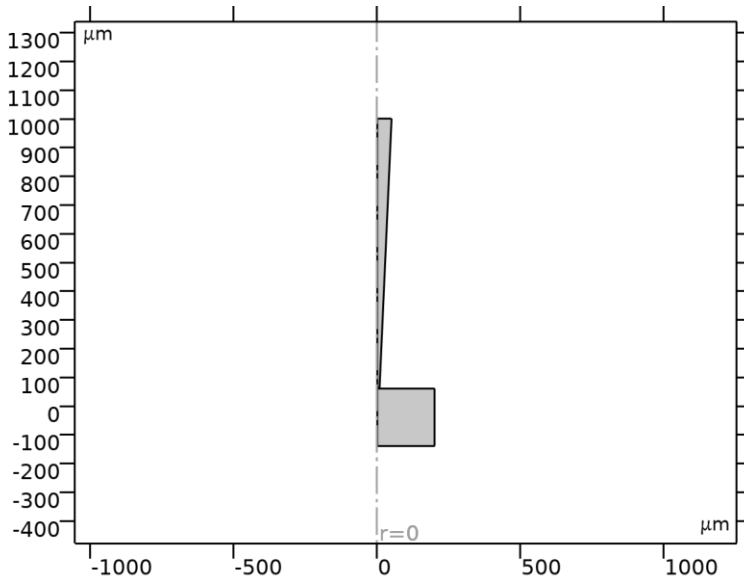

*Corner Refinement 1*

### 2.5.3 Boundary Layers 1 (bl1)

#### SELECTION

|                        |                |
|------------------------|----------------|
| Geometric entity level | Domain         |
| Selection              | Geometry geom1 |

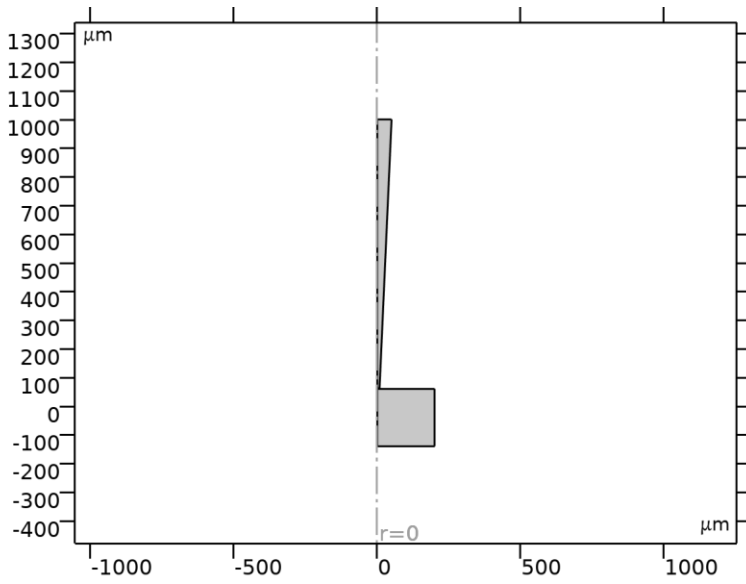

*Boundary Layers 1*

INFORMATION

| Description     | Value              |
|-----------------|--------------------|
| Method          | Legacy version 6.0 |
| Last build time | Not built          |

**Boundary Layer Properties (blp)**

SELECTION

|                        |                                                  |
|------------------------|--------------------------------------------------|
| Geometric entity level | Boundary                                         |
| Selection              | Geometry geom1: Dimension 1: Boundaries 2, 8, 12 |

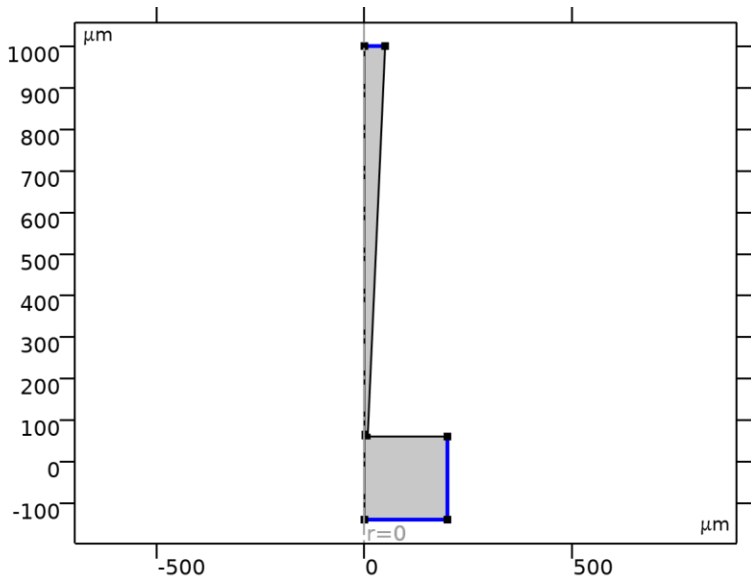

*Boundary Layer Properties*

### 3 Study 1

#### COMPUTATION INFORMATION

|                  |      |
|------------------|------|
| Computation time | 16 s |
|------------------|------|

#### 3.1 STATIONARY

##### STUDY SETTINGS

| Description                    | Value |
|--------------------------------|-------|
| Include geometric nonlinearity | Off   |

##### PHYSICS AND VARIABLES SELECTION

| Physics interface                  | Solve for | Equation form          |
|------------------------------------|-----------|------------------------|
| Transport of Diluted Species (tds) | On        | Automatic (Stationary) |
| Electrostatics (es)                | On        | Automatic (Stationary) |

##### STORE IN OUTPUT

| Interface                          | Output             | Selection |
|------------------------------------|--------------------|-----------|
| Transport of Diluted Species (tds) | Physics controlled |           |
| Electrostatics (es)                | Physics controlled |           |

##### MESH SELECTION

| Component   | Mesh   |
|-------------|--------|
| Component 1 | Mesh 1 |

#### 3.2 SOLVER CONFIGURATIONS

##### 3.2.1 Solution 1

##### Compile Equations: Stationary (st1)

##### STUDY AND STEP

| Description    | Value                   |
|----------------|-------------------------|
| Use study      | <a href="#">Study 1</a> |
| Use study step | Stationary              |

##### LOG

```

<---- Compile Equations: Stationary in Study 1/Solution 1 (sol1) -----
Started at 12-Feb-2024 14:05:51.
Geometry shape order: Linear
Running on Intel64 Family 6 Model 183 Stepping 1, GenuineIntel.
Using 1 socket with 32 cores in total on DS034675.
Available memory: 65.22 GB.
Time: 1 s.
Physical memory: 1.56 GB
Virtual memory: 1.67 GB
Ended at 12-Feb-2024 14:05:52.
----- Compile Equations: Stationary in Study 1/Solution 1 (sol1) ----->

```

## Dependent Variables 1 (v1)

### GENERAL

| Description           | Value                              |
|-----------------------|------------------------------------|
| Defined by study step | <a href="#">Step 1: Stationary</a> |

## Concentration (comp1.cCl) (comp1\_cCl)

### GENERAL

| Description        | Value                              |
|--------------------|------------------------------------|
| Field components   | comp1.cCl                          |
| Internal variables | {comp1.uflux.cCl, comp1.dflux.cCl} |

## Concentration (comp1.cNa) (comp1\_cNa)

### GENERAL

| Description        | Value                              |
|--------------------|------------------------------------|
| Field components   | comp1.cNa                          |
| Internal variables | {comp1.uflux.cNa, comp1.dflux.cNa} |

## Inverse time step measure (comp1.tds.dt2Inv\_cCl) (comp1\_tds\_dt2Inv\_cCl)

### GENERAL

| Description          | Value                |
|----------------------|----------------------|
| Field components     | comp1.tds.dt2Inv_cCl |
| Solve for this field | Off                  |

## Inverse time step measure (comp1.tds.dt2Inv\_cNa) (comp1\_tds\_dt2Inv\_cNa)

### GENERAL

| Description          | Value                |
|----------------------|----------------------|
| Field components     | comp1.tds.dt2Inv_cNa |
| Solve for this field | Off                  |

### Electric potential (comp1.V) (comp1\_V)

#### GENERAL

| Description      | Value   |
|------------------|---------|
| Field components | comp1.V |

### Stationary Solver 1 (s1)

#### GENERAL

| Description           | Value                              |
|-----------------------|------------------------------------|
| Defined by study step | <a href="#">Step 1: Stationary</a> |

#### LOG

```
<---- Stationary Solver 1 in Study 1/Solution 1 (sol1) -----
Started at 12-Feb-2024 14:05:53.
Nonlinear solver
Number of degrees of freedom solved for: 322149 (plus 4590 internal DOFs).
Nonsymmetric matrix found.
Scales for dependent variables:
Concentration (comp1.cCl): 1.5e+002
Concentration (comp1.cNa): 1.9e+002
Electric potential (comp1.V): 99
Orthonormal null-space function used.
Iter      SolEst      ResEst      Damping      Stepsize #Res #Jac #Sol  LinErr  LinRe
s
  1         0.32      9.4e+006    0.0100000    0.33      2   1   2  9.2e-008 3.4e-
015
  2         0.3         64    0.1000000    0.34      3   2   4  2.2e-007 3.5e-
015
  3      8.2e-008    5.3e+003    1.0000000    0.3       4   3   6  6.7e-008 5.9e-
012
  4      5.2e-009         13    1.0000000    8.6e-008   5   4   8  1.3e-006 7.8e-
010
Solution time: 14 s.
Physical memory: 2.85 GB
Virtual memory: 3.57 GB
Ended at 12-Feb-2024 14:06:07.
----- Stationary Solver 1 in Study 1/Solution 1 (sol1) ----->
```

### Fully Coupled 1 (fc1)

#### GENERAL

| Description   | Value                    |
|---------------|--------------------------|
| Linear solver | <a href="#">Direct 1</a> |

#### METHOD AND TERMINATION

| Description                  | Value |
|------------------------------|-------|
| Initial damping factor       | 0.01  |
| Minimum damping factor       | 1E-6  |
| Maximum number of iterations | 50    |

## Direct 1 (d1)

### GENERAL

| Description     | Value |
|-----------------|-------|
| Pivot threshold | 0.1   |

## 4 Results

### 4.1 DATA SETS

#### 4.1.1 Study 1/Solution 1

##### SOLUTION

| Description | Value                             |
|-------------|-----------------------------------|
| Solution    | <a href="#">Solution 1 (sol1)</a> |
| Component   | Component 1 (comp1)               |

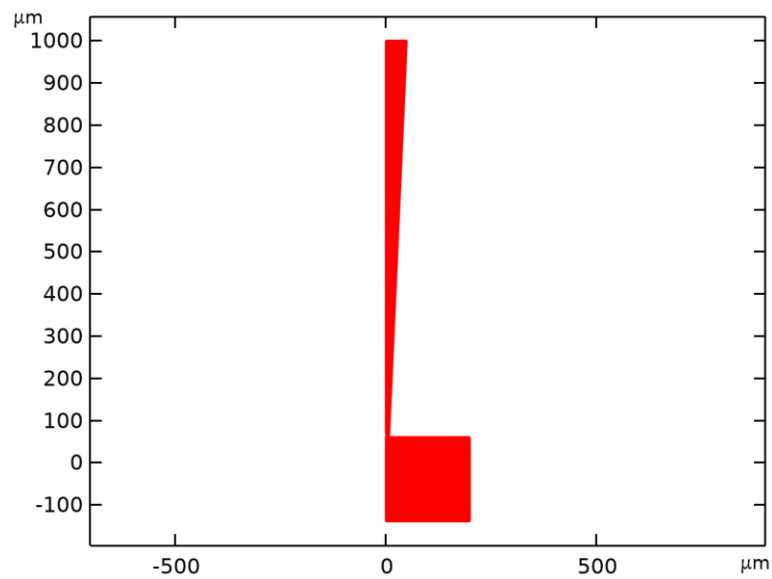

Dataset: Study 1/Solution 1

#### 4.1.2 Revolution 2D

##### DATA

| Description | Value                                     |
|-------------|-------------------------------------------|
| Dataset     | <a href="#">Study 1/Solution 1 (sol1)</a> |

##### AXIS DATA

| Description       | Value            |
|-------------------|------------------|
| Axis entry method | Two points       |
| Points            | {{0, 0}, {0, 1}} |

##### REVOLUTION LAYERS

| Description | Value |
|-------------|-------|
| Start angle | -90   |



| Description      | Value |
|------------------|-------|
| Revolution angle | 225   |

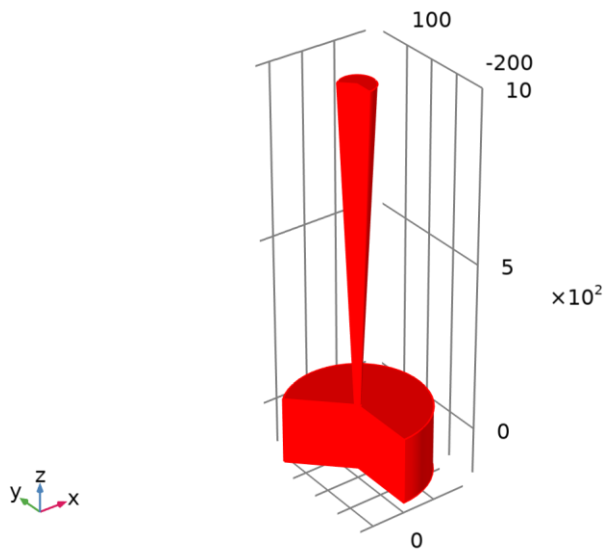

Dataset: Revolution 2D

### 4.1.3 Revolution 2D 2

#### DATA

| Description | Value                                     |
|-------------|-------------------------------------------|
| Dataset     | <a href="#">Study 1/Solution 1 (sol1)</a> |

#### AXIS DATA

| Description       | Value            |
|-------------------|------------------|
| Axis entry method | Two points       |
| Points            | {{0, 0}, {0, 1}} |

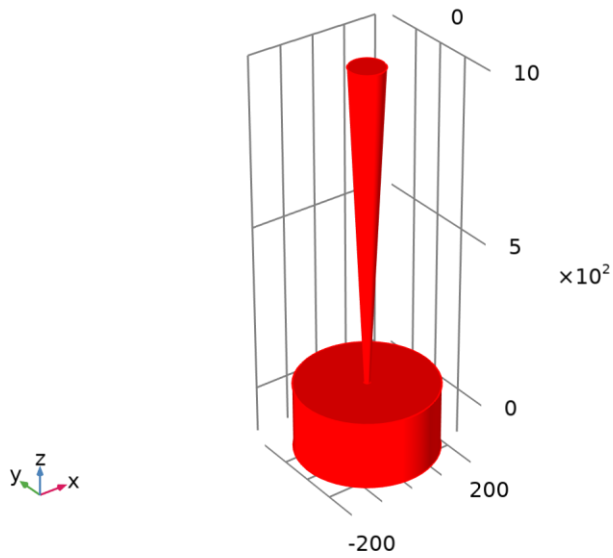

Dataset: Revolution 2D 2

## 4.2 DERIVED VALUES

### 4.2.1 Line Integration 1

#### OUTPUT

Evaluated in [Table 1](#)

#### DATA

| Description | Value                                     |
|-------------|-------------------------------------------|
| Dataset     | <a href="#">Study 1/Solution 1 (sol1)</a> |

#### EXPRESSIONS

| Expression                                                                   | Unit | Description |
|------------------------------------------------------------------------------|------|-------------|
| $(\text{tds.bndFlux\_cNa} - \text{tds.bndFlux\_cCl}) * 96480 [\text{C/mol}]$ | A    |             |

#### INTEGRATION SETTINGS

| Description              | Value |
|--------------------------|-------|
| Integration order        | 4     |
| Compute surface integral | On    |

## 4.3 TABLES

### 4.3.1 Evaluation 2D

Interactive 2D values

### 4.3.2 Table 1

Line Integration 1 ((tds.bndFlux\_cNa-tds.bndFlux\_cCl)\*96480[C/mol])

|                                                           |
|-----------------------------------------------------------|
| <b>(tds.bndFlux_cNa-tds.bndFlux_cCl)*96480[C/mol] (A)</b> |
| 2.4643E-7                                                 |

## 4.4 PLOT GROUPS

### 4.4.1 Concentration (tds)

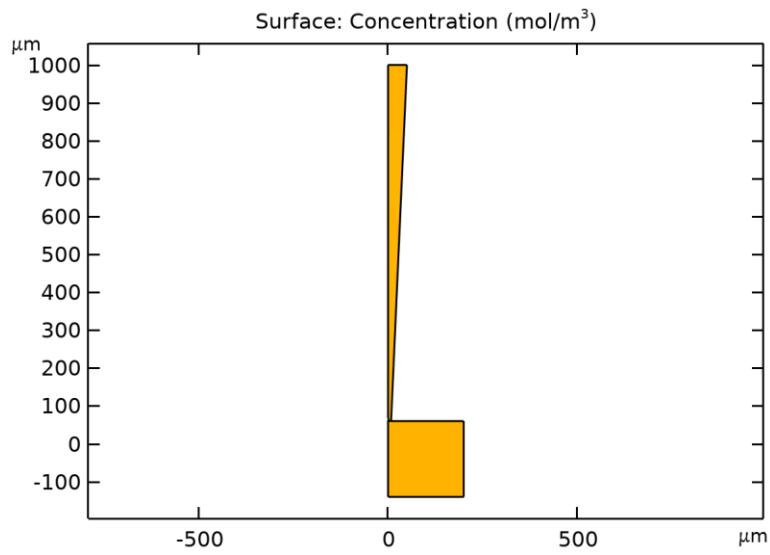

*Surface: Concentration (mol/m<sup>3</sup>)*

### 4.4.2 Concentration (tds) 1

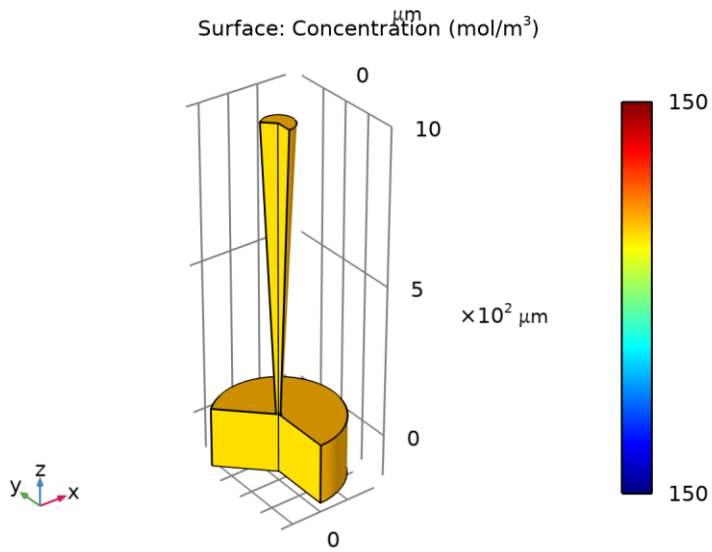

*Surface: Concentration ( $\text{mol}/\text{m}^3$ )*

### 4.4.3 Electric Potential (es)

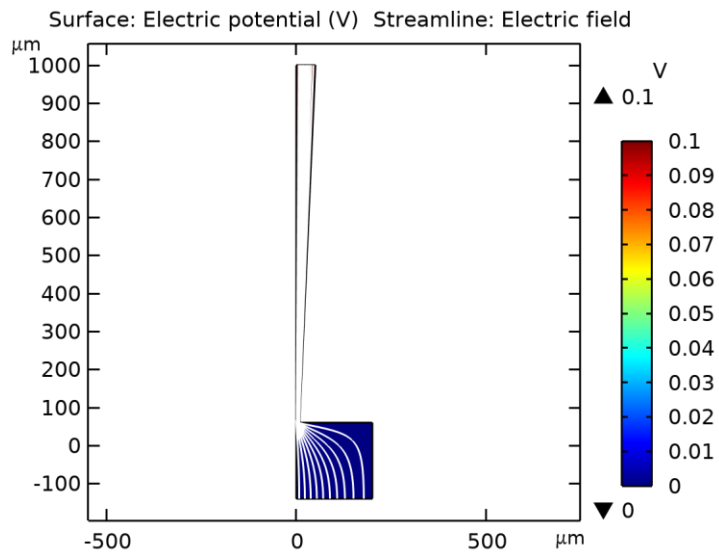

*Surface: Electric potential (V) Streamline: Electric field*

#### 4.4.4 Electric Potential, Revolved Geometry (es)

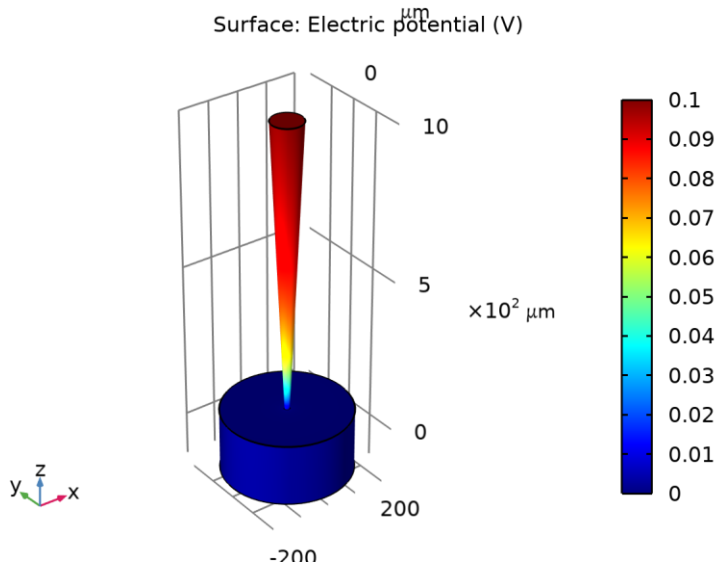

Surface: Electric potential (V)

#### 4.4.5 1D Plot Group 5

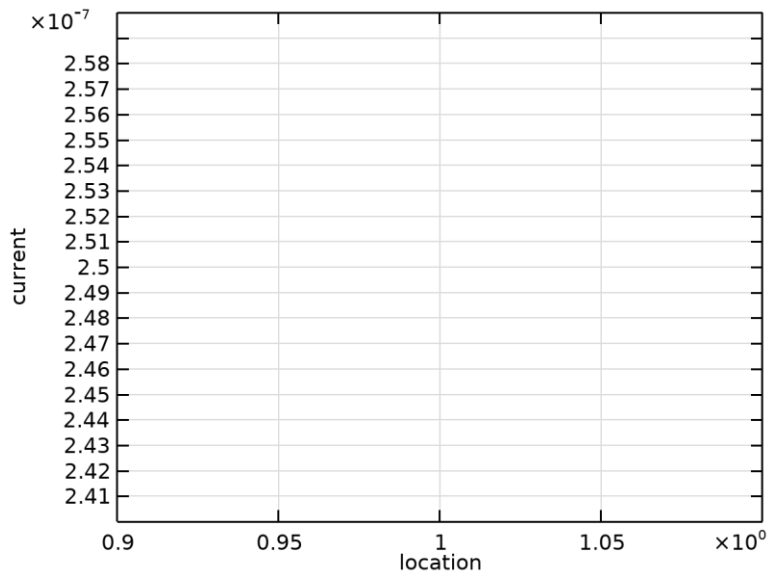

Point Graph: Concentration ( $\text{mol}/\text{m}^3$ )
