# Supplementary material for: Resistive pulse analysis of chiral amino acids utilizing metal–amino acid crystallization differences
Source: Royal Society of Chemistry journal article supplement (doi:10.1039/d4an00347k), 2024-01-01
Supplement: d4an00347k2.pdf [file d4an00347k2.pdf]

## Disk

|             |                          |
|-------------|--------------------------|
| Report date | Feb 19, 2024, 3:10:08 PM |
|-------------|--------------------------|

# Contents

|                                         |           |
|-----------------------------------------|-----------|
| <b>1. Global Definitions .....</b>      | <b>3</b>  |
| 1.1. Parameters.....                    | 3         |
| <b>2. Component 1 .....</b>             | <b>4</b>  |
| 2.1. Definitions.....                   | 4         |
| 2.2. Geometry 1.....                    | 5         |
| 2.3. Transport of Diluted Species ..... | 7         |
| 2.4. Electrostatics .....               | 27        |
| 2.5. Mesh 1 .....                       | 46        |
| <b>3. Study 1 .....</b>                 | <b>52</b> |
| 3.1. Stationary .....                   | 52        |
| 3.2. Solver Configurations.....         | 52        |
| <b>4. Results .....</b>                 | <b>56</b> |
| 4.1. Data Sets.....                     | 56        |
| 4.2. Derived Values .....               | 58        |
| 4.3. Tables.....                        | 58        |
| 4.4. Plot Groups.....                   | 59        |

# 1 Global Definitions

|      |                           |
|------|---------------------------|
| Date | Feb 12, 2024, 12:08:21 PM |
|------|---------------------------|

## GLOBAL SETTINGS

|             |                                      |
|-------------|--------------------------------------|
| Name        | Disk.mph                             |
| Path        | C:\Users\hl5630\Downloads\disk.mph   |
| Version     | COMSOL Multiphysics 6.2 (Build: 290) |
| Unit system | SI                                   |

## USED PRODUCTS

|                      |
|----------------------|
| Microfluidics Module |
| COMSOL Multiphysics  |

## COMPUTER INFORMATION

|                  |                                                         |
|------------------|---------------------------------------------------------|
| CPU              | Intel64 Family 6 Model 85 Stepping 7, 4 cores, 8 GB RAM |
| Operating system | Windows 10                                              |

## 1.1 PARAMETERS

### PARAMETERS 1

| Name | Expression | Value    | Description |
|------|------------|----------|-------------|
| Loc  | 65[um]     | 6.5E-5 m |             |

## 2 Component 1

|      |                          |
|------|--------------------------|
| Date | Feb 12, 2024, 6:59:13 AM |
|------|--------------------------|

### SETTINGS

| Description                                                 | Value                      |
|-------------------------------------------------------------|----------------------------|
| Unit system                                                 | Same as global system (SI) |
| Geometry shape function                                     | Automatic                  |
| Avoid inverted elements by curving interior domain elements | Off                        |

### SPATIAL FRAME COORDINATES

| First | Second | Third |
|-------|--------|-------|
| r     | phi    | z     |

### MATERIAL FRAME COORDINATES

| First | Second | Third |
|-------|--------|-------|
| R     | PHI    | Z     |

### GEOMETRY FRAME COORDINATES

| First | Second | Third |
|-------|--------|-------|
| Rg    | PHIg   | Zg    |

### MESH FRAME COORDINATES

| First | Second | Third |
|-------|--------|-------|
| Rm    | PHIm   | Zm    |

## 2.1 DEFINITIONS

### 2.1.1 Coordinate Systems

#### Boundary System 1

|                        |                 |
|------------------------|-----------------|
| Coordinate system type | Boundary system |
| Tag                    | sys1            |

### COORDINATE NAMES

| First | Second | Third |
|-------|--------|-------|
| t1    | to     | n     |

## 2.2 GEOMETRY 1

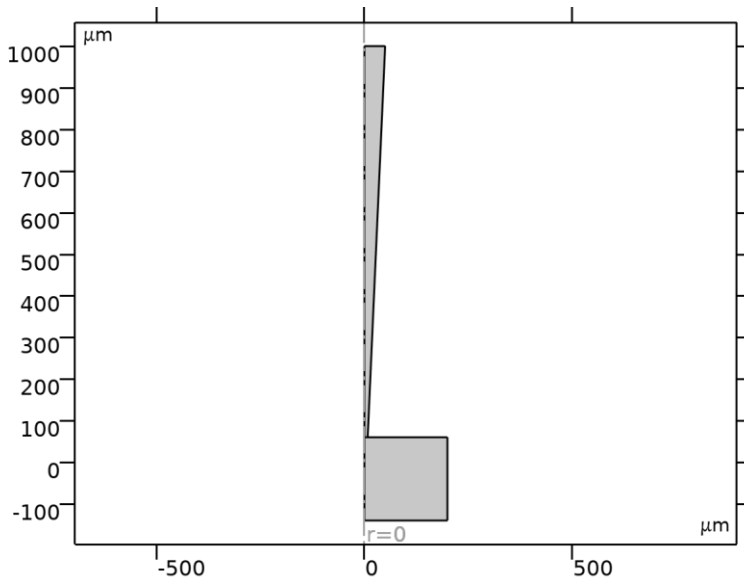

Geometry 1

### UNITS

|              |               |
|--------------|---------------|
| Length unit  | $\mu\text{m}$ |
| Angular unit | deg           |

### GEOMETRY STATISTICS

| Description          | Value |
|----------------------|-------|
| Space dimension      | 2     |
| Number of domains    | 2     |
| Number of boundaries | 11    |
| Number of vertices   | 10    |

### 2.2.1 Rectangle 1 (r1)

#### POSITION

| Description | Value     |
|-------------|-----------|
| Position    | {0, -140} |

#### SIZE

| Description | Value |
|-------------|-------|
| Width       | 200   |
| Height      | 200   |

#### INFORMATION

| Description     | Value                                              |
|-----------------|----------------------------------------------------|
| Last build time | < 1 second                                         |
| Built with      | COMSOL 6.2.0.290 (win64), Feb 19, 2024, 3:07:59 PM |

## 2.2.2 Polygon 1 (pol1)

### OBJECT TYPE

| Description | Value |
|-------------|-------|
| Type        | Solid |

### COORDINATES

| Description | Value                |
|-------------|----------------------|
| Data source | Vectors              |
| r           | {0, 8, 50, 0}        |
| z           | {60, 60, 1000, 1000} |

### INFORMATION

| Description     | Value                                              |
|-----------------|----------------------------------------------------|
| Last build time | < 1 second                                         |
| Built with      | COMSOL 6.2.0.290 (win64), Feb 19, 2024, 3:07:59 PM |

## 2.2.3 Circle 1 (c1)

### POSITION

| Description | Value    |
|-------------|----------|
| Position    | {0, Loc} |

### SIZE AND SHAPE

| Description | Value |
|-------------|-------|
| Radius      | 1     |

### INFORMATION

| Description     | Value                                              |
|-----------------|----------------------------------------------------|
| Last build time | < 1 second                                         |
| Built with      | COMSOL 6.2.0.290 (win64), Feb 19, 2024, 3:07:59 PM |

## 2.2.4 Difference 1 (dif1)

### INFORMATION

| Description     | Value      |
|-----------------|------------|
| Last build time | < 1 second |

| Description | Value                                              |
|-------------|----------------------------------------------------|
| Built with  | COMSOL 6.2.0.290 (win64), Feb 19, 2024, 3:07:59 PM |

## 2.2.5 Form Union (fin)

### INFORMATION

| Description     | Value   |
|-----------------|---------|
| Last build time | Unknown |

## 2.3 TRANSPORT OF DILUTED SPECIES

### USED PRODUCTS

|                      |
|----------------------|
| Microfluidics Module |
| COMSOL Multiphysics  |

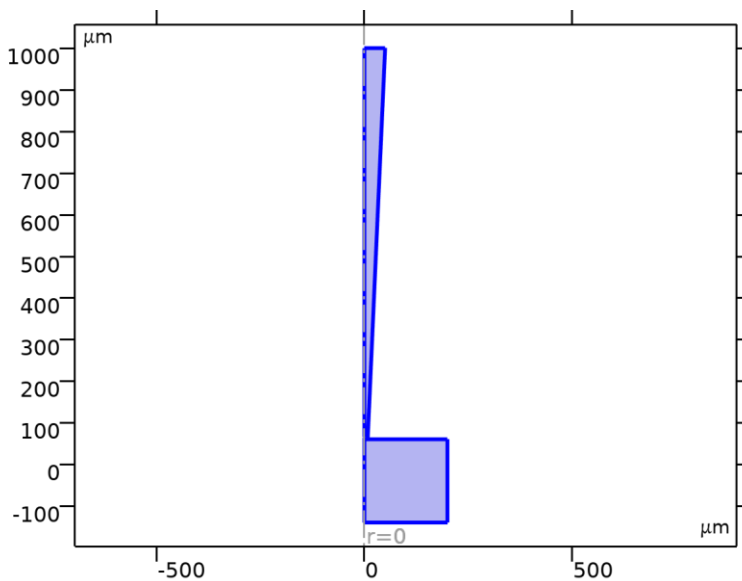

*Transport of Diluted Species*

### SELECTION

|                        |                                          |
|------------------------|------------------------------------------|
| Geometric entity level | Domain                                   |
| Selection              | Geometry geom1: Dimension 2: All domains |

### EQUATIONS

$$\nabla \cdot \mathbf{J}_i = R_i$$

$$\mathbf{J}_i = -D_i \nabla c_i - z_i \mu_{mj} F c_i \nabla V$$

## 2.3.1 Interface Settings

### Discretization

#### SETTINGS

| Description   | Value  |
|---------------|--------|
| Concentration | Linear |

#### SETTINGS

| Description   | Value            |
|---------------|------------------|
| Equation form | Study controlled |

### Species Activity

#### SETTINGS

| Description      | Value |
|------------------|-------|
| Species activity | Ideal |

### Transport Mechanisms

#### SETTINGS

| Description                   | Value |
|-------------------------------|-------|
| Convection                    | Off   |
| Migration in electric field   | On    |
| Mass transfer in porous media | Off   |

## 2.3.2 Variables

| Name      | Expression | Unit | Description                     | Selection            | Details |
|-----------|------------|------|---------------------------------|----------------------|---------|
| tds.d     | 1          | 1    | Out-of-plane geometry extension | Global               |         |
| tds.f_cNa | 1          | 1    | Activity coefficient            | Domains 1–2          |         |
| tds.f_cCl | 1          | 1    | Activity coefficient            | Domains 1–2          |         |
| tds.nr    | nr         | 1    | Normal vector, r-component      | Boundary 4           |         |
| tds.nphi  | 0          | 1    | Normal vector, phi-component    | Boundary 4           |         |
| tds.nz    | nz         | 1    | Normal vector, z-component      | Boundary 4           |         |
| tds.nr    | dnr        | 1    | Normal vector, r-component      | Boundaries 1–3, 5–11 |         |
| tds.nphi  | 0          | 1    | Normal vector, phi-component    | Boundaries 1–3, 5–11 |         |



| Name         | Expression | Unit | Description                         | Selection            | Details |
|--------------|------------|------|-------------------------------------|----------------------|---------|
| tds.nz       | dnz        | 1    | Normal vector, z-component          | Boundaries 1–3, 5–11 |         |
| tds.nR       | nR         | 1    | Normal vector, R-component          | Boundary 4           |         |
| tds.nPHI     | 0          | 1    | Normal vector, PHI-component        | Boundary 4           |         |
| tds.nZ       | nZ         | 1    | Normal vector, Z-component          | Boundary 4           |         |
| tds.nR       | dnR        | 1    | Normal vector, R-component          | Boundaries 1–3, 5–11 |         |
| tds.nPHI     | 0          | 1    | Normal vector, PHI-component        | Boundaries 1–3, 5–11 |         |
| tds.nZ       | dnZ        | 1    | Normal vector, Z-component          | Boundaries 1–3, 5–11 |         |
| tds.nRg      | nRg        | 1    | Normal vector, Rg-component         | Boundary 4           |         |
| tds.nPHIlg   | 0          | 1    | Normal vector, PHIlg-component      | Boundary 4           |         |
| tds.nZg      | nZg        | 1    | Normal vector, Zg-component         | Boundary 4           |         |
| tds.nRg      | dnRg       | 1    | Normal vector, Rg-component         | Boundaries 1–3, 5–11 |         |
| tds.nPHIlg   | 0          | 1    | Normal vector, PHIlg-component      | Boundaries 1–3, 5–11 |         |
| tds.nZg      | dnZg       | 1    | Normal vector, Zg-component         | Boundaries 1–3, 5–11 |         |
| tds.nrmesh   | nrmesh     | 1    | Normal vector (mesh), r-component   | Boundary 4           |         |
| tds.nphimesh | 0          | 1    | Normal vector (mesh), phi-component | Boundary 4           |         |
| tds.nzmesh   | nzmesh     | 1    | Normal vector (mesh), z-component   | Boundary 4           |         |
| tds.nrmesh   | dnrmesh    | 1    | Normal vector (mesh), r-component   | Boundaries 1–3, 5–11 |         |
| tds.nphimesh | 0          | 1    | Normal vector (mesh), phi-component | Boundaries 1–3, 5–11 |         |

| Name         | Expression               | Unit                    | Description                                         | Selection            | Details     |
|--------------|--------------------------|-------------------------|-----------------------------------------------------|----------------------|-------------|
| tds.nzmesh   | dnzmesh                  | 1                       | Normal vector (mesh), z-component                   | Boundaries 1–3, 5–11 |             |
| tds.nrc      | nrc/tds.ncLen            | 1                       | Normal vector, r-component                          | Boundaries 1–11      |             |
| tds.nphic    | 0                        | 1                       | Normal vector, phi-component                        | Boundaries 1–11      |             |
| tds.nzc      | nzc/tds.ncLen            | 1                       | Normal vector, z-component                          | Boundaries 1–11      |             |
| tds.ncLen    | $\sqrt{nrc^2+nzc^2+eps}$ | 1                       | Help variable                                       | Boundaries 1–11      |             |
| tds.R_cNa    | 0                        | mol/(m <sup>3</sup> ·s) | Total rate expression                               | Domains 1–2          | + operation |
| tds.cP_cNa   | 0                        | mol/kg                  | Concentration species adsorbed to the solid         | Domains 1–2          | + operation |
| tds.cP_cNa   | 0                        | mol/kg                  | Concentration species adsorbed to the solid         | Boundaries 1–11      | + operation |
| tds.KP_cNa   | 0                        | m <sup>3</sup> /kg      | Adsorption isotherm, first concentration derivative | Domains 1–2          | + operation |
| tds.KP_cNa   | 0                        | m <sup>3</sup> /kg      | Adsorption isotherm, first concentration derivative | Boundaries 1–11      | + operation |
| tds.Rads_cNa | 0                        | mol/(m <sup>3</sup> ·s) | Total adsorption rate                               | Domains 1–2          | + operation |
| tds.DiT_cNa  | 0                        | m <sup>2</sup> /s       | Turbulent diffusivity                               | Domains 1–2          |             |
| tds.cVar_cNa | cNa                      | mol/m <sup>3</sup>      | Species                                             | Boundaries 1–11      |             |
| tds.cVar_cNa | cNa                      | mol/m <sup>3</sup>      | Species                                             | Points 1–10          |             |
| tds.R_cCl    | 0                        | mol/(m <sup>3</sup> ·s) | Total rate expression                               | Domains 1–2          | + operation |
| tds.cP_cCl   | 0                        | mol/kg                  | Concentration species adsorbed to the solid         | Domains 1–2          | + operation |
| tds.cP_cCl   | 0                        | mol/kg                  | Concentration species adsorbed to the solid         | Boundaries 1–11      | + operation |

| Name         | Expression | Unit                    | Description                                         | Selection       | Details     |
|--------------|------------|-------------------------|-----------------------------------------------------|-----------------|-------------|
| tds.KP_cCl   | 0          | m <sup>3</sup> /kg      | Adsorption isotherm, first concentration derivative | Domains 1–2     | + operation |
| tds.KP_cCl   | 0          | m <sup>3</sup> /kg      | Adsorption isotherm, first concentration derivative | Boundaries 1–11 | + operation |
| tds.Rads_cCl | 0          | mol/(m <sup>3</sup> ·s) | Total adsorption rate                               | Domains 1–2     | + operation |
| tds.DiT_cCl  | 0          | m <sup>2</sup> /s       | Turbulent diffusivity                               | Domains 1–2     |             |
| tds.cVar_cCl | cCl        | mol/m <sup>3</sup>      | Species                                             | Boundaries 1–11 |             |
| tds.cVar_cCl | cCl        | mol/m <sup>3</sup>      | Species                                             | Points 1–10     |             |
| tds.poro     | 1          | 1                       | Porosity                                            | Domains 1–2     |             |
| tds.theta_g  | 0          | 1                       | Gas volume fraction                                 | Domains 1–2     |             |
| tds.theta_l  | 1          | 1                       | Liquid volume fraction                              | Domains 1–2     |             |
| tds.theta    | tds.poro   | 1                       | Mobile fluid volume fraction                        | Domains 1–2     |             |

### 2.3.3 Species Charges

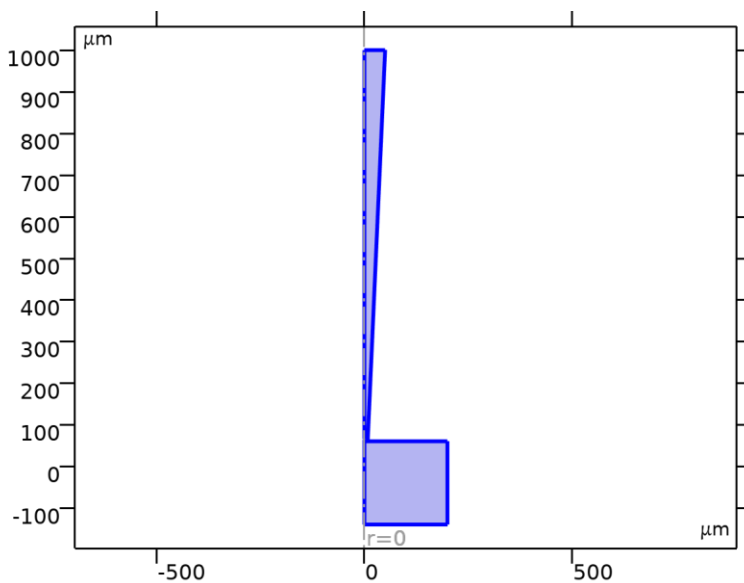

Species Charges

### SELECTION

|                        |                                          |
|------------------------|------------------------------------------|
| Geometric entity level | Domain                                   |
| Selection              | Geometry geom1: Dimension 2: All domains |

### Charge

#### SETTINGS

| Description   | Value   |
|---------------|---------|
| Charge number | {1, -1} |

### Model Input

#### SETTINGS

| Description | Value              |
|-------------|--------------------|
| Temperature | Common model input |

### Variables

| Name      | Expression | Unit | Description   | Selection   |
|-----------|------------|------|---------------|-------------|
| tds.z_cNa | 1          | 1    | Charge number | Domains 1–2 |
| tds.z_cCl | -1         | 1    | Charge number | Domains 1–2 |

## 2.3.4 Transport Properties 1

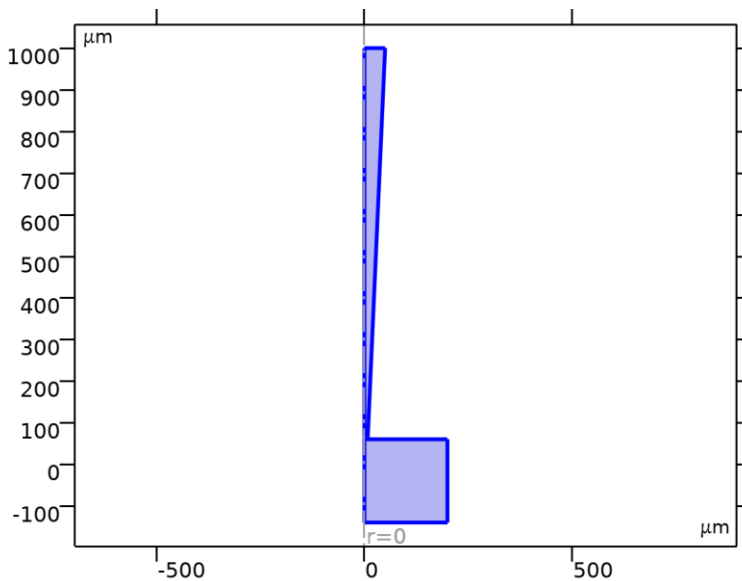

### Transport Properties 1

#### SELECTION

|                        |                                          |
|------------------------|------------------------------------------|
| Geometric entity level | Domain                                   |
| Selection              | Geometry geom1: Dimension 2: All domains |

## EQUATIONS

$$\nabla \cdot \mathbf{J}_i = R_i$$

$$\mathbf{J}_i = -D_i \nabla c_i - z_i \mu_{m,i} F c_i \nabla V$$

### Diffusion

#### SETTINGS

| Description           | Value        | Unit              |
|-----------------------|--------------|-------------------|
| Source                | Material     |                   |
| Material              | None         |                   |
| Diffusion coefficient | User defined |                   |
| Diffusion coefficient | 1.33E-9      | m <sup>2</sup> /s |
| Diffusion coefficient | User defined |                   |
| Diffusion coefficient | 2.03E-9      | m <sup>2</sup> /s |

### Migration in Electric Field

#### SETTINGS

| Description        | Value                      |
|--------------------|----------------------------|
| Electric potential | Electric potential (es)    |
| Mobility           | Nernst - Einstein relation |

### Coordinate System Selection

#### SETTINGS

| Description       | Value                    |
|-------------------|--------------------------|
| Coordinate system | Global coordinate system |

### Model Input

#### SETTINGS

| Description | Value        | Unit |
|-------------|--------------|------|
| Temperature | User defined |      |
| Temperature | 293.15       | K    |

### Variables

| Name         | Expression                                   | Unit      | Description              | Selection   | Details |
|--------------|----------------------------------------------|-----------|--------------------------|-------------|---------|
| domflux.cNar | 2*(tds.dflux_cNar+tds.mflux_cNar)*pi*r*tds.d | mol/(m·s) | Domain flux, r-component | Domains 1–2 |         |
| domflux.cNaz | 2*(tds.dflux_cNaz+tds.mflux_cNaz)*pi*r*tds.d | mol/(m·s) | Domain flux, z-component | Domains 1–2 |         |

| Name            | Expression                                                                    | Unit                    | Description                 | Selection             | Details |
|-----------------|-------------------------------------------------------------------------------|-------------------------|-----------------------------|-----------------------|---------|
| domflux.cClr    | $2*(tds.dflux\_cClr+tds.mflux\_cClr)*\pi*r*tds.d$                             | mol/(m·s)               | Domain flux, r-component    | Domains 1–2           |         |
| domflux.cClz    | $2*(tds.dflux\_cClz+tds.mflux\_cClz)*\pi*r*tds.d$                             | mol/(m·s)               | Domain flux, z-component    | Domains 1–2           |         |
| tds.ndflux_cNa  | $tds.dflux\_cNar*tds.nrc+tds.dflux\_cNaphi*tds.nphic+tds.dflux\_cNaz*tds.nzc$ | mol/(m <sup>2</sup> ·s) | Normal diffusive flux       | Boundaries 2, 4, 6–11 |         |
| tds.nmflux_cNa  | $tds.mflux\_cNar*tds.nrc+tds.mflux\_cNaphi*tds.nphic+tds.mflux\_cNaz*tds.nzc$ | mol/(m <sup>2</sup> ·s) | Normal electrophoretic flux | Boundaries 2, 4, 6–11 |         |
| tds.ntflux_cNa  | tds.bndFlux_cNa                                                               | mol/(m <sup>2</sup> ·s) | Normal total flux           | Boundaries 2, 4, 6–11 |         |
| tds.ndflux_cCl  | $tds.dflux\_cClr*tds.nrc+tds.dflux\_cClphi*tds.nphic+tds.dflux\_cClz*tds.nzc$ | mol/(m <sup>2</sup> ·s) | Normal diffusive flux       | Boundaries 2, 4, 6–11 |         |
| tds.nmflux_cCl  | $tds.mflux\_cClr*tds.nrc+tds.mflux\_cClphi*tds.nphic+tds.mflux\_cClz*tds.nzc$ | mol/(m <sup>2</sup> ·s) | Normal electrophoretic flux | Boundaries 2, 4, 6–11 |         |
| tds.ntflux_cCl  | tds.bndFlux_cCl                                                               | mol/(m <sup>2</sup> ·s) | Normal total flux           | Boundaries 2, 4, 6–11 |         |
| tds.bndFlux_cNa | $0.25*(uflux\_spatial(cNa)-dflux\_spatial(cNa))/(\pi*r*tds.d)$                | mol/(m <sup>2</sup> ·s) | Boundary flux               | Boundary 4            | Meta    |
| tds.bndFlux_cNa | $-dflux\_spatial(cNa)/tds.d$                                                  | mol/(m <sup>2</sup> ·s) | Boundary flux               | Boundaries 1, 3, 5    |         |
| tds.bndFlux_cNa | $-0.5*dflux\_spatial(cNa)/(\pi*r*tds.d)$                                      | mol/(m <sup>2</sup> ·s) | Boundary flux               | Boundaries 2, 6–11    | Meta    |
| tds.bndFlux_cCl | $0.25*(uflux\_spatial(cCl)-dflux\_spatial(cCl))/(\pi*r*tds.d)$                | mol/(m <sup>2</sup> ·s) | Boundary flux               | Boundary 4            | Meta    |
| tds.bndFlux_cCl | $-dflux\_spatial(cCl)/tds.d$                                                  | mol/(m <sup>2</sup> ·s) | Boundary flux               | Boundaries 1, 3, 5    |         |

| Name             | Expression                               | Unit                    | Description                                   | Selection          | Details     |
|------------------|------------------------------------------|-------------------------|-----------------------------------------------|--------------------|-------------|
| tds.bndFlux_cCl  | -<br>0.5*dflux_spatial(cCl)/(pi*r*tds.d) | mol/(m <sup>2</sup> ·s) | Boundary flux                                 | Boundaries 2, 6–11 | Meta        |
| tds.DF_cNarr     | 1.33E-9[m <sup>2</sup> /s]               | m <sup>2</sup> /s       | Fluid diffusion coefficient, rr-component     | Domains 1–2        |             |
| tds.DF_cNaphir   | 0                                        | m <sup>2</sup> /s       | Fluid diffusion coefficient, phir-component   | Domains 1–2        |             |
| tds.DF_cNazr     | 0                                        | m <sup>2</sup> /s       | Fluid diffusion coefficient, zr-component     | Domains 1–2        |             |
| tds.DF_cNarphi   | 0                                        | m <sup>2</sup> /s       | Fluid diffusion coefficient, rphi-component   | Domains 1–2        |             |
| tds.DF_cNaphiphi | 1.33E-9[m <sup>2</sup> /s]               | m <sup>2</sup> /s       | Fluid diffusion coefficient, phiphi-component | Domains 1–2        |             |
| tds.DF_cNazphi   | 0                                        | m <sup>2</sup> /s       | Fluid diffusion coefficient, zphi-component   | Domains 1–2        |             |
| tds.DF_cNarz     | 0                                        | m <sup>2</sup> /s       | Fluid diffusion coefficient, rz-component     | Domains 1–2        |             |
| tds.DF_cNaphiz   | 0                                        | m <sup>2</sup> /s       | Fluid diffusion coefficient, phiz-component   | Domains 1–2        |             |
| tds.DF_cNazz     | 1.33E-9[m <sup>2</sup> /s]               | m <sup>2</sup> /s       | Fluid diffusion coefficient, zz-component     | Domains 1–2        |             |
| tds.D_cNarr      | tds.DF_cNarr+tds.DiT_cNa                 | m <sup>2</sup> /s       | Diffusion coefficient, rr-component           | Domains 1–2        | + operation |
| tds.D_cNaphir    | tds.DF_cNaphir                           | m <sup>2</sup> /s       | Diffusion coefficient, phir-component         | Domains 1–2        | + operation |
| tds.D_cNazr      | tds.DF_cNazr                             | m <sup>2</sup> /s       | Diffusion coefficient, zr-component           | Domains 1–2        | + operation |
| tds.D_cNarphi    | tds.DF_cNarphi                           | m <sup>2</sup> /s       | Diffusion coefficient, rphi-component         | Domains 1–2        | + operation |

| Name             | Expression                   | Unit              | Description                                   | Selection   | Details     |
|------------------|------------------------------|-------------------|-----------------------------------------------|-------------|-------------|
| tds.D_cNaphiphi  | tds.DF_cNaphiphi+tds.DiT_cNa | m <sup>2</sup> /s | Diffusion coefficient, phiphi-component       | Domains 1–2 | + operation |
| tds.D_cNazphi    | tds.DF_cNazphi               | m <sup>2</sup> /s | Diffusion coefficient, zphi-component         | Domains 1–2 | + operation |
| tds.D_cNarz      | tds.DF_cNarz                 | m <sup>2</sup> /s | Diffusion coefficient, rz-component           | Domains 1–2 | + operation |
| tds.D_cNaphiz    | tds.DF_cNaphiz               | m <sup>2</sup> /s | Diffusion coefficient, phiz-component         | Domains 1–2 | + operation |
| tds.D_cNazz      | tds.DF_cNazz+tds.DiT_cNa     | m <sup>2</sup> /s | Diffusion coefficient, zz-component           | Domains 1–2 | + operation |
| tds.DF_cClrr     | 2.03E-9[m <sup>2</sup> /s]   | m <sup>2</sup> /s | Fluid diffusion coefficient, rr-component     | Domains 1–2 |             |
| tds.DF_cClphir   | 0                            | m <sup>2</sup> /s | Fluid diffusion coefficient, phir-component   | Domains 1–2 |             |
| tds.DF_cClzr     | 0                            | m <sup>2</sup> /s | Fluid diffusion coefficient, zr-component     | Domains 1–2 |             |
| tds.DF_cClrphi   | 0                            | m <sup>2</sup> /s | Fluid diffusion coefficient, rphi-component   | Domains 1–2 |             |
| tds.DF_cClphiphi | 2.03E-9[m <sup>2</sup> /s]   | m <sup>2</sup> /s | Fluid diffusion coefficient, phiphi-component | Domains 1–2 |             |
| tds.DF_cClzphi   | 0                            | m <sup>2</sup> /s | Fluid diffusion coefficient, zphi-component   | Domains 1–2 |             |
| tds.DF_cClrz     | 0                            | m <sup>2</sup> /s | Fluid diffusion coefficient, rz-component     | Domains 1–2 |             |
| tds.DF_cClphiz   | 0                            | m <sup>2</sup> /s | Fluid diffusion coefficient, phiz-component   | Domains 1–2 |             |
| tds.DF_cClzz     | 2.03E-9[m <sup>2</sup> /s]   | m <sup>2</sup> /s | Fluid diffusion coefficient, zz-              | Domains 1–2 |             |



| Name             | Expression                                                      | Unit                    | Description                                       | Selection   | Details     |
|------------------|-----------------------------------------------------------------|-------------------------|---------------------------------------------------|-------------|-------------|
|                  |                                                                 |                         | component                                         |             |             |
| tds.D_cClrr      | tds.DF_cClrr+tds.Di<br>T_cCl                                    | m <sup>2</sup> /s       | Diffusion<br>coefficient, rr-<br>component        | Domains 1–2 | + operation |
| tds.D_cClphir    | tds.DF_cClphir                                                  | m <sup>2</sup> /s       | Diffusion<br>coefficient, phir-<br>component      | Domains 1–2 | + operation |
| tds.D_cClzr      | tds.DF_cClzr                                                    | m <sup>2</sup> /s       | Diffusion<br>coefficient, zr-<br>component        | Domains 1–2 | + operation |
| tds.D_cClrphi    | tds.DF_cClrphi                                                  | m <sup>2</sup> /s       | Diffusion<br>coefficient, rphi-<br>component      | Domains 1–2 | + operation |
| tds.D_cClphiphi  | tds.DF_cClphiphi+t<br>ds.DiT_cCl                                | m <sup>2</sup> /s       | Diffusion<br>coefficient,<br>phiphi-<br>component | Domains 1–2 | + operation |
| tds.D_cClzphi    | tds.DF_cClzphi                                                  | m <sup>2</sup> /s       | Diffusion<br>coefficient, zphi-<br>component      | Domains 1–2 | + operation |
| tds.D_cClrz      | tds.DF_cClrz                                                    | m <sup>2</sup> /s       | Diffusion<br>coefficient, rz-<br>component        | Domains 1–2 | + operation |
| tds.D_cClphiz    | tds.DF_cClphiz                                                  | m <sup>2</sup> /s       | Diffusion<br>coefficient, phiz-<br>component      | Domains 1–2 | + operation |
| tds.D_cClzz      | tds.DF_cClzz+tds.Di<br>T_cCl                                    | m <sup>2</sup> /s       | Diffusion<br>coefficient, zz-<br>component        | Domains 1–2 | + operation |
| tds.Dav_cNa      | 0.5*(tds.D_cNarr+td<br>s.D_cNaz)                                | m <sup>2</sup> /s       | Average diffusion<br>coefficient                  | Domains 1–2 |             |
| tds.Dav_cCl      | 0.5*(tds.D_cClrr+tds<br>.D_cClzz)                               | m <sup>2</sup> /s       | Average diffusion<br>coefficient                  | Domains 1–2 |             |
| tds.tflux_cNar   | tds.dflux_cNar+tds.<br>mflux_cNar                               | mol/(m <sup>2</sup> ·s) | Total flux, r-<br>component                       | Domains 1–2 | + operation |
| tds.tflux_cNaphi | tds.dflux_cNaphi+t<br>ds.mflux_cNaphi                           | mol/(m <sup>2</sup> ·s) | Total flux, phi-<br>component                     | Domains 1–2 | + operation |
| tds.tflux_cNaz   | tds.dflux_cNaz+tds.<br>mflux_cNaz                               | mol/(m <sup>2</sup> ·s) | Total flux, z-<br>component                       | Domains 1–2 | + operation |
| tds.dfluxMag_cNa | sqrt(tds.dflux_cNar<br>^2+tds.dflux_cNaphi<br>^2+tds.dflux_cNaz | mol/(m <sup>2</sup> ·s) | Diffusive flux<br>magnitude                       | Domains 1–2 |             |

| Name              | Expression                                                                                     | Unit                    | Description                         | Selection   | Details     |
|-------------------|------------------------------------------------------------------------------------------------|-------------------------|-------------------------------------|-------------|-------------|
|                   | $z^2$ )                                                                                        |                         |                                     |             |             |
| tds.tfluxMag_cNa  | $\sqrt{tds.tflux\_cNar^2 + tds.tflux\_cNaphi^2 + tds.tflux\_cNaz^2}$                           | mol/(m <sup>2</sup> ·s) | Total flux magnitude                | Domains 1–2 |             |
| tds.dpflux_cNar   | 0                                                                                              | mol/(m <sup>2</sup> ·s) | Dispersive flux, r-component        | Domains 1–2 |             |
| tds.dpflux_cNaphi | 0                                                                                              | mol/(m <sup>2</sup> ·s) | Dispersive flux, phi-component      | Domains 1–2 |             |
| tds.dpflux_cNaz   | 0                                                                                              | mol/(m <sup>2</sup> ·s) | Dispersive flux, z-component        | Domains 1–2 |             |
| tds.mflux_cNar    | $tds.z\_cNa * F\_const * cNa * (-tds.um\_cNarr * d(tds.V,r) - tds.um\_cNarz * d(tds.V,z))$     | mol/(m <sup>2</sup> ·s) | Electrophoretic flux, r-component   | Domains 1–2 |             |
| tds.mflux_cNaphi  | $tds.z\_cNa * F\_const * cNa * (-tds.um\_cNaphir * d(tds.V,r) - tds.um\_cNaphiz * d(tds.V,z))$ | mol/(m <sup>2</sup> ·s) | Electrophoretic flux, phi-component | Domains 1–2 |             |
| tds.mflux_cNaz    | $tds.z\_cNa * F\_const * cNa * (-tds.um\_cNazr * d(tds.V,r) - tds.um\_cNaz * d(tds.V,z))$      | mol/(m <sup>2</sup> ·s) | Electrophoretic flux, z-component   | Domains 1–2 |             |
| tds.mfluxMag_cNa  | $\sqrt{tds.mflux\_cNar^2 + tds.mflux\_cNaphi^2 + tds.mflux\_cNaz^2}$                           | mol/(m <sup>2</sup> ·s) | Electrophoretic flux magnitude      | Domains 1–2 |             |
| tds.tflux_cClr    | $tds.dflux\_cClr + tds.mflux\_cClr$                                                            | mol/(m <sup>2</sup> ·s) | Total flux, r-component             | Domains 1–2 | + operation |
| tds.tflux_cClphi  | $tds.dflux\_cClphi + tds.mflux\_cClphi$                                                        | mol/(m <sup>2</sup> ·s) | Total flux, phi-component           | Domains 1–2 | + operation |
| tds.tflux_cClz    | $tds.dflux\_cClz + tds.mflux\_cClz$                                                            | mol/(m <sup>2</sup> ·s) | Total flux, z-component             | Domains 1–2 | + operation |
| tds.dfluxMag_cCl  | $\sqrt{tds.dflux\_cClr^2 + tds.dflux\_cClphi^2 + tds.dflux\_cClz^2}$                           | mol/(m <sup>2</sup> ·s) | Diffusive flux magnitude            | Domains 1–2 |             |
| tds.tfluxMag_cCl  | $\sqrt{tds.tflux\_cClr^2}$                                                                     | mol/(m <sup>2</sup> ·s) | Total flux                          | Domains 1–2 |             |

| Name              | Expression                                                                                   | Unit                    | Description                         | Selection   | Details     |
|-------------------|----------------------------------------------------------------------------------------------|-------------------------|-------------------------------------|-------------|-------------|
|                   | $+tds.tflux\_cClphi^2 + tds.tflux\_cClz^2)$                                                  |                         | magnitude                           |             |             |
| tds.dpflux_cClr   | 0                                                                                            | mol/(m <sup>2</sup> ·s) | Dispersive flux, r-component        | Domains 1–2 |             |
| tds.dpflux_cClphi | 0                                                                                            | mol/(m <sup>2</sup> ·s) | Dispersive flux, phi-component      | Domains 1–2 |             |
| tds.dpflux_cClz   | 0                                                                                            | mol/(m <sup>2</sup> ·s) | Dispersive flux, z-component        | Domains 1–2 |             |
| tds.mflux_cClr    | $tds.z\_cCl * F\_const * cCl * (-tds.um\_cClr * d(tds.V,r) - tds.um\_cClr * d(tds.V,z))$     | mol/(m <sup>2</sup> ·s) | Electrophoretic flux, r-component   | Domains 1–2 |             |
| tds.mflux_cClphi  | $tds.z\_cCl * F\_const * cCl * (-tds.um\_cClphi * d(tds.V,r) - tds.um\_cClphi * d(tds.V,z))$ | mol/(m <sup>2</sup> ·s) | Electrophoretic flux, phi-component | Domains 1–2 |             |
| tds.mflux_cClz    | $tds.z\_cCl * F\_const * cCl * (-tds.um\_cClz * d(tds.V,r) - tds.um\_cClz * d(tds.V,z))$     | mol/(m <sup>2</sup> ·s) | Electrophoretic flux, z-component   | Domains 1–2 |             |
| tds.mfluxMag_cCl  | $\sqrt{tds.mflux\_cClr^2 + tds.mflux\_cClphi^2 + tds.mflux\_cClz^2}$                         | mol/(m <sup>2</sup> ·s) | Electrophoretic flux magnitude      | Domains 1–2 |             |
| tds.cNa_material  | $cNa * spatial.detF$                                                                         | mol/m <sup>3</sup>      | Concentration                       | Domains 1–2 |             |
| tds.dflux_cNar    | $-tds.D\_cNar * cNar - tds.D\_cNarz * cNaz$                                                  | mol/(m <sup>2</sup> ·s) | Diffusive flux, r-component         | Domains 1–2 | + operation |
| tds.dflux_cNaphi  | $-tds.D\_cNaphi * cNar - tds.D\_cNaphiz * cNaz$                                              | mol/(m <sup>2</sup> ·s) | Diffusive flux, phi-component       | Domains 1–2 | + operation |
| tds.dflux_cNaz    | $-tds.D\_cNazr * cNar - tds.D\_cNaz * cNaz$                                                  | mol/(m <sup>2</sup> ·s) | Diffusive flux, z-component         | Domains 1–2 | + operation |
| tds.grad_cNar     | $cNar$                                                                                       | mol/m <sup>4</sup>      | Concentration gradient, r-component | Domains 1–2 |             |

| Name             | Expression                             | Unit                    | Description                           | Selection   | Details     |
|------------------|----------------------------------------|-------------------------|---------------------------------------|-------------|-------------|
| tds.grad_cNaphi  | 0                                      | mol/m <sup>4</sup>      | Concentration gradient, phi-component | Domains 1–2 |             |
| tds.grad_cNaz    | cNaz                                   | mol/m <sup>4</sup>      | Concentration gradient, z-component   | Domains 1–2 |             |
| tds.cCl_material | cCl*spatial.detF                       | mol/m <sup>3</sup>      | Concentration                         | Domains 1–2 |             |
| tds.dflux_cClr   | -tds.D_cClrr*cClr-tds.D_cClrz*cClz     | mol/(m <sup>2</sup> .s) | Diffusive flux, r-component           | Domains 1–2 | + operation |
| tds.dflux_cClphi | -tds.D_cClphir*cClr-tds.D_cClphiz*cClz | mol/(m <sup>2</sup> .s) | Diffusive flux, phi-component         | Domains 1–2 | + operation |
| tds.dflux_cClz   | -tds.D_cClzr*cClr-tds.D_cClzz*cClz     | mol/(m <sup>2</sup> .s) | Diffusive flux, z-component           | Domains 1–2 | + operation |
| tds.grad_cClr    | cClr                                   | mol/m <sup>4</sup>      | Concentration gradient, r-component   | Domains 1–2 |             |
| tds.grad_cClphi  | 0                                      | mol/m <sup>4</sup>      | Concentration gradient, phi-component | Domains 1–2 |             |
| tds.grad_cClz    | cClz                                   | mol/m <sup>4</sup>      | Concentration gradient, z-component   | Domains 1–2 |             |
| tds.um_cNarr     | tds.D_cNarr/(R_const*tds.T)            | s-mol/kg                | Mobility, rr-component                | Domains 1–2 |             |
| tds.um_cNaphir   | tds.D_cNaphir/(R_const*tds.T)          | s-mol/kg                | Mobility, phir-component              | Domains 1–2 |             |
| tds.um_cNazr     | tds.D_cNazr/(R_const*tds.T)            | s-mol/kg                | Mobility, zr-component                | Domains 1–2 |             |
| tds.um_cNarphi   | tds.D_cNarphi/(R_const*tds.T)          | s-mol/kg                | Mobility, rphi-component              | Domains 1–2 |             |
| tds.um_cNaphiphi | tds.D_cNaphiphi/(R_const*tds.T)        | s-mol/kg                | Mobility, phiphi-component            | Domains 1–2 |             |
| tds.um_cNazphi   | tds.D_cNazphi/(R_const*tds.T)          | s-mol/kg                | Mobility, zphi-component              | Domains 1–2 |             |
| tds.um_cNarz     | tds.D_cNarz/(R_const*tds.T)            | s-mol/kg                | Mobility, rz-component                | Domains 1–2 |             |
| tds.um_cNaphiz   | tds.D_cNaphiz/(R_const*tds.T)          | s-mol/kg                | Mobility, phiz-component              | Domains 1–2 |             |
| tds.um_cNazz     | tds.D_cNazz/(R_const*tds.T)            | s-mol/kg                | Mobility, zz-component                | Domains 1–2 |             |
| tds.um_cClrr     | tds.D_cClrr/(R_const                   | s-mol/kg                | Mobility, rr-                         | Domains 1–2 |             |

| Name             | Expression                                                                                                                                                                                                                                                                                                            | Unit                    | Description                    | Selection   | Details     |
|------------------|-----------------------------------------------------------------------------------------------------------------------------------------------------------------------------------------------------------------------------------------------------------------------------------------------------------------------|-------------------------|--------------------------------|-------------|-------------|
|                  | *tds.T)                                                                                                                                                                                                                                                                                                               |                         | component                      |             |             |
| tds.um_cClphir   | tds.D_cClphir/(R_const*tds.T)                                                                                                                                                                                                                                                                                         | s-mol/kg                | Mobility, phir-component       | Domains 1–2 |             |
| tds.um_cClzr     | tds.D_cClzr/(R_const*tds.T)                                                                                                                                                                                                                                                                                           | s-mol/kg                | Mobility, zr-component         | Domains 1–2 |             |
| tds.um_cClrphi   | tds.D_cClrphi/(R_const*tds.T)                                                                                                                                                                                                                                                                                         | s-mol/kg                | Mobility, rphi-component       | Domains 1–2 |             |
| tds.um_cClphiphi | tds.D_cClphiphi/(R_const*tds.T)                                                                                                                                                                                                                                                                                       | s-mol/kg                | Mobility, phiphi-component     | Domains 1–2 |             |
| tds.um_cClzphi   | tds.D_cClzphi/(R_const*tds.T)                                                                                                                                                                                                                                                                                         | s-mol/kg                | Mobility, zphi-component       | Domains 1–2 |             |
| tds.um_cClrz     | tds.D_cClrz/(R_const*tds.T)                                                                                                                                                                                                                                                                                           | s-mol/kg                | Mobility, rz-component         | Domains 1–2 |             |
| tds.um_cClphiz   | tds.D_cClphiz/(R_const*tds.T)                                                                                                                                                                                                                                                                                         | s-mol/kg                | Mobility, phiz-component       | Domains 1–2 |             |
| tds.um_cClzz     | tds.D_cClzz/(R_const*tds.T)                                                                                                                                                                                                                                                                                           | s-mol/kg                | Mobility, zz-component         | Domains 1–2 |             |
| tds.V            | model.input.V                                                                                                                                                                                                                                                                                                         | V                       | Electric potential             | Domains 1–2 | Meta        |
| tds.T            | tds.cdm1.mininput_temperature                                                                                                                                                                                                                                                                                         | K                       | Temperature                    | Domains 1–2 |             |
| tds.Rlin_cNa     | 0                                                                                                                                                                                                                                                                                                                     | 1/s                     | Linear source term coefficient | Domains 1–2 | + operation |
| tds.Res_cNa      | d(cNa*tds.z_cNa*F_const*(-tds.um_cNarr*d(tds.V,r)-tds.um_cNarz*d(tds.V,z)),r)+if(abs(r)<0.001*h_spatial,d(cNa*tds.z_cNa*F_const*(-tds.um_cNarr*d(tds.V,r)-tds.um_cNarz*d(tds.V,z)),r),cNa*tds.z_cNa*F_const*(-tds.um_cNarr*d(tds.V,r)-tds.um_cNarz*d(tds.V,z)))/r)+d(cNa*tds.z_cNa*F_const*(-tds.um_cNazr*d(tds.V,r)- | mol/(m <sup>3</sup> -s) | Equation residual              | Domains 1–2 |             |

| Name                   | Expression                                                                                                                                                                                                                                                                                                                                                                                                                                                                                                                                                                                                                                                                                                                                                                                                      | Unit                                     | Description                    | Selection   | Details     |
|------------------------|-----------------------------------------------------------------------------------------------------------------------------------------------------------------------------------------------------------------------------------------------------------------------------------------------------------------------------------------------------------------------------------------------------------------------------------------------------------------------------------------------------------------------------------------------------------------------------------------------------------------------------------------------------------------------------------------------------------------------------------------------------------------------------------------------------------------|------------------------------------------|--------------------------------|-------------|-------------|
|                        | $\text{tds.um\_cNaz} \cdot d(\text{tds.V}, z) - \text{cNa} \cdot \text{tds.Rlin\_cNa} - \text{tds.R\_cNa}$                                                                                                                                                                                                                                                                                                                                                                                                                                                                                                                                                                                                                                                                                                      |                                          |                                |             |             |
| $\text{tds.Rlin\_cCl}$ | 0                                                                                                                                                                                                                                                                                                                                                                                                                                                                                                                                                                                                                                                                                                                                                                                                               | 1/s                                      | Linear source term coefficient | Domains 1–2 | + operation |
| $\text{tds.Res\_cCl}$  | $d(\text{cCl} \cdot \text{tds.z\_cCl} \cdot \text{F\_const} \cdot (-\text{tds.um\_cClr} \cdot d(\text{tds.V}, r) - \text{tds.um\_cClrz} \cdot d(\text{tds.V}, z)), r) + \text{if}(\text{abs}(r) < 0.001 \cdot \text{h\_spatial}, d(\text{cCl} \cdot \text{tds.z\_cCl} \cdot \text{F\_const} \cdot (-\text{tds.um\_cClr} \cdot d(\text{tds.V}, r) - \text{tds.um\_cClrz} \cdot d(\text{tds.V}, z)), r), \text{cCl} \cdot \text{tds.z\_cCl} \cdot \text{F\_const} \cdot (-\text{tds.um\_cClr} \cdot d(\text{tds.V}, r) - \text{tds.um\_cClrz} \cdot d(\text{tds.V}, z)) / r) + d(\text{cCl} \cdot \text{tds.z\_cCl} \cdot \text{F\_const} \cdot (-\text{tds.um\_cClzr} \cdot d(\text{tds.V}, r) - \text{tds.um\_cClzz} \cdot d(\text{tds.V}, z)), z) - \text{cCl} \cdot \text{tds.Rlin\_cCl} - \text{tds.R\_cCl}$ | $\text{mol}/(\text{m}^3 \cdot \text{s})$ | Equation residual              | Domains 1–2 |             |

### Shape functions

| Name | Shape function    | Unit                    | Description   | Shape frame | Selection   |
|------|-------------------|-------------------------|---------------|-------------|-------------|
| cNa  | Lagrange (Linear) | $\text{mol}/\text{m}^3$ | Concentration | Spatial     | Domains 1–2 |
| cCl  | Lagrange (Linear) | $\text{mol}/\text{m}^3$ | Concentration | Spatial     | Domains 1–2 |

### Weak Expressions

| Weak expression                                                                                                                                                | Integration order | Integration frame | Selection   |
|----------------------------------------------------------------------------------------------------------------------------------------------------------------|-------------------|-------------------|-------------|
| $2 \cdot (\text{tds.dflux\_cNar} \cdot \text{test}(\text{cNar}) + \text{tds.dflux\_cNaz} \cdot \text{test}(\text{cNaz})) \cdot \text{tds.d} \cdot \pi \cdot r$ | 2                 | Spatial           | Domains 1–2 |
| $2 \cdot (\text{tds.dflux\_cClr} \cdot \text{test}(\text{cClr}) + \text{tds.dflux\_cClz} \cdot \text{test}(\text{cClz})) \cdot \text{tds.d} \cdot \pi \cdot r$ | 2                 | Spatial           | Domains 1–2 |
| $2 \cdot \text{tds.z\_cNa} \cdot \text{F\_const} \cdot \text{cNa} \cdot (-\text{tds.um\_cNar} \cdot d(\text{tds.V}, r) -$                                      | 2                 | Spatial           | Domains 1–2 |

| Weak expression                                                                                                                                                                                                                                                                                                                                                        | Integration order | Integration frame | Selection   |
|------------------------------------------------------------------------------------------------------------------------------------------------------------------------------------------------------------------------------------------------------------------------------------------------------------------------------------------------------------------------|-------------------|-------------------|-------------|
| $\text{tds.um\_cNarz} \cdot d(\text{tds.V,z}) \cdot \text{test}(c\text{Nar}) + (-\text{tds.um\_cNazr} \cdot d(\text{tds.V,r}) - \text{tds.um\_cNazz} \cdot d(\text{tds.V,z})) \cdot \text{test}(c\text{Naz}) \cdot \text{tds.d} \cdot \pi \cdot r$                                                                                                                     |                   |                   |             |
| $2 \cdot \text{tds.z\_cCl} \cdot F\_const \cdot c\text{Cl} \cdot ((-\text{tds.um\_cClrr} \cdot d(\text{tds.V,r}) - \text{tds.um\_cClrz} \cdot d(\text{tds.V,z})) \cdot \text{test}(c\text{Clr}) + (-\text{tds.um\_cClzr} \cdot d(\text{tds.V,r}) - \text{tds.um\_cClzz} \cdot d(\text{tds.V,z})) \cdot \text{test}(c\text{Clz})) \cdot \text{tds.d} \cdot \pi \cdot r$ | 2                 | Spatial           | Domains 1–2 |
| $2 \cdot \text{tds.streamline} \cdot (\text{isScalingSystemDomain} = 0) \cdot \text{tds.d} \cdot \pi \cdot r$                                                                                                                                                                                                                                                          | 2                 | Spatial           | Domains 1–2 |
| $2 \cdot \text{tds.crosswind} \cdot (\text{isScalingSystemDomain} = 0) \cdot \text{tds.d} \cdot \pi \cdot r$                                                                                                                                                                                                                                                           | 4                 | Spatial           | Domains 1–2 |

### 2.3.5 Axial Symmetry 1

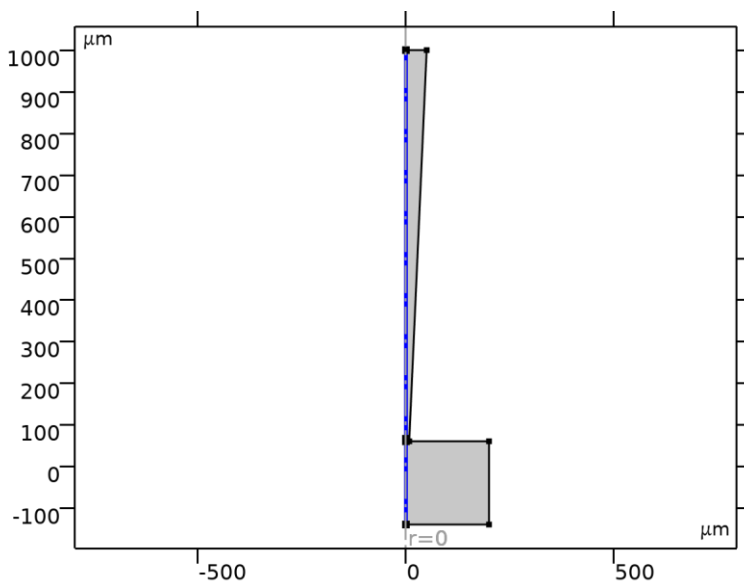

*Axial Symmetry 1*

#### SELECTION

|                        |                                             |
|------------------------|---------------------------------------------|
| Geometric entity level | Boundary                                    |
| Selection              | Geometry geom1: Dimension 1: All boundaries |

## 2.3.6 No Flux 1

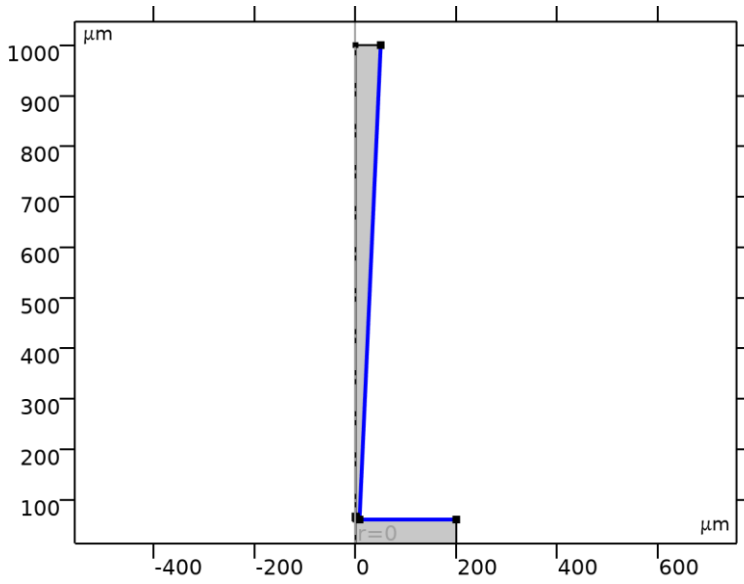

No Flux 1

### SELECTION

|                        |                                             |
|------------------------|---------------------------------------------|
| Geometric entity level | Boundary                                    |
| Selection              | Geometry geom1: Dimension 1: All boundaries |

### EQUATIONS

$$-\mathbf{n} \cdot (\mathbf{J}_i + \mathbf{u}c_i) = 0$$

### Convection

#### SETTINGS

| Description | Value |
|-------------|-------|
| Include     | On    |



### 2.3.7 Initial Values 1

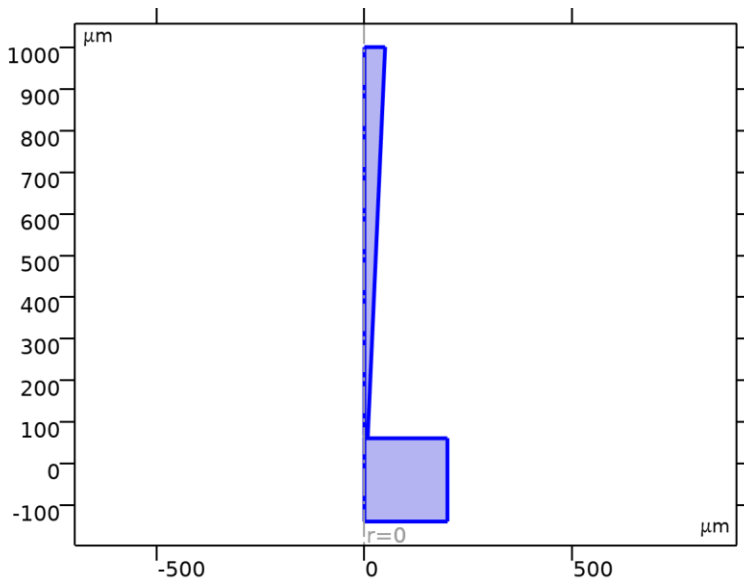

*Initial Values 1*

#### SELECTION

|                        |                                          |
|------------------------|------------------------------------------|
| Geometric entity level | Domain                                   |
| Selection              | Geometry geom1: Dimension 2: All domains |

#### Initial Values

##### SETTINGS

| Description   | Value      | Unit               |
|---------------|------------|--------------------|
| Concentration | {150, 150} | mol/m <sup>3</sup> |

#### Variables

| Name       | Expression | Unit               | Description   | Selection   | Details     |
|------------|------------|--------------------|---------------|-------------|-------------|
| tds.c0_cNa | 150        | mol/m <sup>3</sup> | Concentration | Domains 1–2 | + operation |
| tds.c0_cCl | 150        | mol/m <sup>3</sup> | Concentration | Domains 1–2 | + operation |

### 2.3.8 Concentration 1

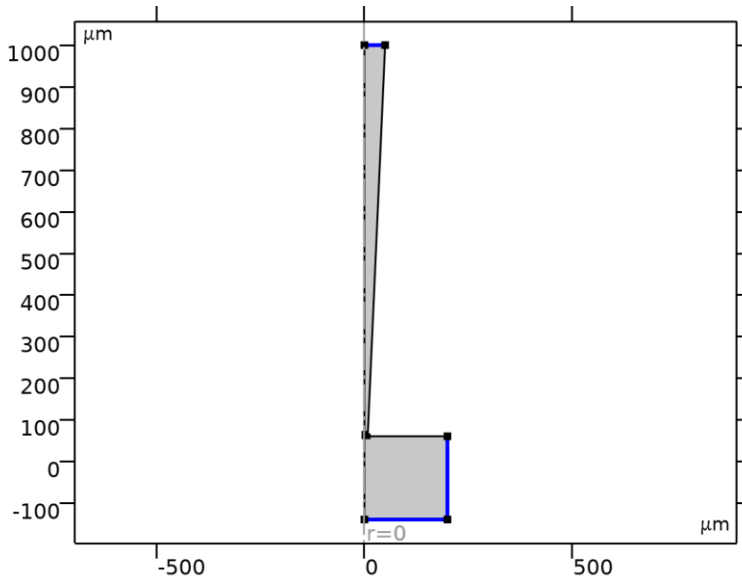

Concentration 1

#### SELECTION

|                        |                                                 |
|------------------------|-------------------------------------------------|
| Geometric entity level | Boundary                                        |
| Selection              | Geometry geom1: Dimension 1: Boundaries 2, 6, 9 |

#### EQUATIONS

$$c_i = c_{0j}$$

.....

#### Concentration

##### SETTINGS

| Description   | Value      | Unit               |
|---------------|------------|--------------------|
| Species cNa   | On         |                    |
| Species cCl   | On         |                    |
| Concentration | {150, 150} | mol/m <sup>3</sup> |

#### Variables

| Name                 | Expression                                 | Unit               | Description            | Selection          | Details     |
|----------------------|--------------------------------------------|--------------------|------------------------|--------------------|-------------|
| tds.c0_cNa           | 150                                        | mol/m <sup>3</sup> | Concentration          | Boundaries 2, 6, 9 | + operation |
| tds.c0_cCl           | 150                                        | mol/m <sup>3</sup> | Concentration          | Boundaries 2, 6, 9 | + operation |
| tds.conc1.nmflow_cNa | tds.conc1.int(2*tds.ntflux_cNa*pi*r)*tds.d | mol/s              | Normal molar flow rate | Global             |             |

| Name                 | Expression                                 | Unit  | Description            | Selection | Details |
|----------------------|--------------------------------------------|-------|------------------------|-----------|---------|
| tds.conc1.nmflow_cCl | tds.conc1.int(2*tds.ntflux_cCl*pi*r)*tds.d | mol/s | Normal molar flow rate | Global    |         |

### Constraints

| Constraint               | Constraint force               | Shape function    | Selection          | Details   |
|--------------------------|--------------------------------|-------------------|--------------------|-----------|
| -tds.cVar_cNa+tds.c0_cNa | test(-tds.cVar_cNa+tds.c0_cNa) | Lagrange (Linear) | Boundaries 2, 6, 9 | Elemental |
| -tds.cVar_cCl+tds.c0_cCl | test(-tds.cVar_cCl+tds.c0_cCl) | Lagrange (Linear) | Boundaries 2, 6, 9 | Elemental |

## 2.4 ELECTROSTATICS

### USED PRODUCTS

COMSOL Multiphysics

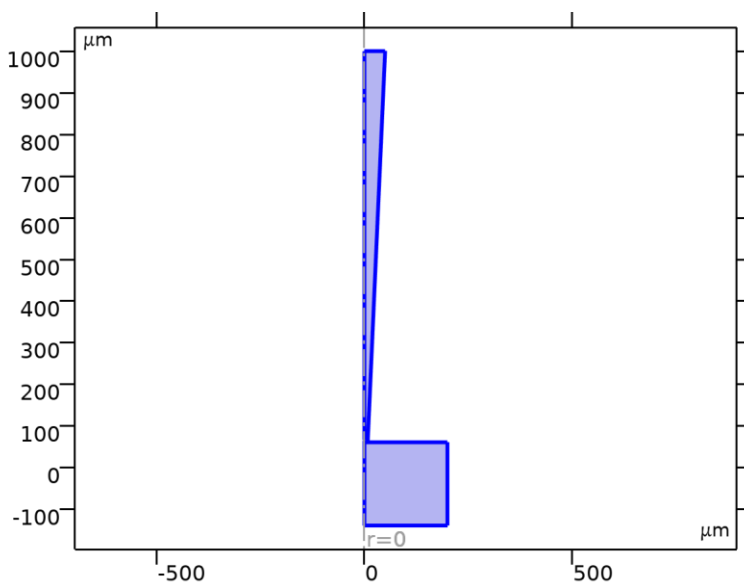

### Electrostatics

#### SELECTION

|                        |                                          |
|------------------------|------------------------------------------|
| Geometric entity level | Domain                                   |
| Selection              | Geometry geom1: Dimension 2: All domains |

#### EQUATIONS

$$\nabla \cdot \mathbf{D} = \rho_v$$

$$\mathbf{E} = -\nabla V$$

## 2.4.1 Interface Settings

### Discretization

#### SETTINGS

| Description        | Value     |
|--------------------|-----------|
| Electric potential | Quadratic |

### Manual Terminal Sweep Settings

#### SETTINGS

| Description               | Value | Unit     |
|---------------------------|-------|----------|
| Use manual terminal sweep | Off   |          |
| Reference impedance       | 50    | $\Omega$ |

## 2.4.2 Variables

| Name        | Expression | Unit | Description                       | Selection            | Details |
|-------------|------------|------|-----------------------------------|----------------------|---------|
| es.d        | 1          | 1    | Contribution                      | Domains 1–2          |         |
| es.nr       | nr         |      | Normal vector, r-component        | Boundary 4           |         |
| es.nphi     | 0          |      | Normal vector, phi-component      | Boundary 4           |         |
| es.nz       | nz         |      | Normal vector, z-component        | Boundary 4           |         |
| es.nr       | dnr        |      | Normal vector, r-component        | Boundaries 1–3, 5–11 |         |
| es.nphi     | 0          |      | Normal vector, phi-component      | Boundaries 1–3, 5–11 |         |
| es.nz       | dnz        |      | Normal vector, z-component        | Boundaries 1–3, 5–11 |         |
| es.nmeshr   | nrmesh     |      | Mesh normal vector, r-component   | Boundary 4           |         |
| es.nmeshphi | 0          |      | Mesh normal vector, phi-component | Boundary 4           |         |
| es.nmeshz   | nzmesh     |      | Mesh normal vector, z-component   | Boundary 4           |         |
| es.nmeshr   | dnrmesh    |      | Mesh normal vector, r-component   | Boundaries 1–3, 5–11 |         |
| es.nmeshphi | 0          |      | Mesh normal                       | Boundaries 1–        |         |

| Name         | Expression                                                                                                                                                                                                                | Unit | Description                                             | Selection            | Details |
|--------------|---------------------------------------------------------------------------------------------------------------------------------------------------------------------------------------------------------------------------|------|---------------------------------------------------------|----------------------|---------|
|              |                                                                                                                                                                                                                           |      | vector, phi-component                                   | 3, 5–11              |         |
| es.nmeshz    | dnzmesh                                                                                                                                                                                                                   |      | Mesh normal vector, z-component                         | Boundaries 1–3, 5–11 |         |
| es.unmeshr   | unrmesh                                                                                                                                                                                                                   |      | Mesh normal vector, upside, r-component                 | Boundaries 1–11      |         |
| es.unmeshphi | 0                                                                                                                                                                                                                         |      | Mesh normal vector, upside, phi-component               | Boundaries 1–11      |         |
| es.unmeshz   | unzmesh                                                                                                                                                                                                                   |      | Mesh normal vector, upside, z-component                 | Boundaries 1–11      |         |
| es.dnmeshr   | dnrmesh                                                                                                                                                                                                                   |      | Mesh normal vector, downside, r-component               | Boundaries 1–11      |         |
| es.dnmeshphi | 0                                                                                                                                                                                                                         |      | Mesh normal vector, downside, phi-component             | Boundaries 1–11      |         |
| es.dnmeshz   | dnzmesh                                                                                                                                                                                                                   |      | Mesh normal vector, downside, z-component               | Boundaries 1–11      |         |
| es.l_sRR     | $(\text{spatial.inVF11} * (\text{spatial.inVF11} * \text{es.l_srr} + \text{spatial.inVF31} * \text{es.l_srz}) + \text{spatial.inVF11} * \text{es.l_srz} + \text{spatial.inVF31} * \text{es.l_szz}) * \text{spatial.detF}$ | 1    | Spatial identity matrix, material frame, RR-component   | Domains 1–2          |         |
| es.l_sPHIR   | $\text{if}(\text{Rg} > 0.001 * \text{h}, \text{R}/\text{r}, \text{Rr}) * (\text{spatial.inVF11} * \text{es.l_sphir} + \text{spatial.inVF31} * \text{es.l_sphiz}) * \text{spatial.detF}$                                   | 1    | Spatial identity matrix, material frame, PHIR-component | Domains 1–2          |         |
| es.l_sZR     | $(\text{spatial.inVF11} * (\text{spatial.inVF13} * \text{es.l_srr} + \text{spatial.inVF33} * \text{es.l_srz}) + \text{spatial.inVF11} * \text{es.l_srz} + \text{spatial.inVF33} * \text{es.l_szz}) * \text{spatial.detF}$ | 1    | Spatial identity matrix, material frame, ZR-component   | Domains 1–2          |         |

| Name         | Expression                                                                                                                                                                                                                                               | Unit | Description                                               | Selection   | Details |
|--------------|----------------------------------------------------------------------------------------------------------------------------------------------------------------------------------------------------------------------------------------------------------|------|-----------------------------------------------------------|-------------|---------|
| es.l_sRPHI   | $\text{if}(R_g > 0.001 * h, R/r, R_r) * (\text{spatial.invF11} * \text{es.l\_srphi} + \text{spatial.invF31} * \text{es.l\_szphi}) * \text{spatial.detF}$                                                                                                 | 1    | Spatial identity matrix, material frame, RPHI-component   | Domains 1–2 |         |
| es.l_sPHIPHI | $\text{if}(R_g > 0.001 * h, R/r, R_r) ^ 2 * \text{es.l\_sphiphi} * \text{spatial.detF}$                                                                                                                                                                  | 1    | Spatial identity matrix, material frame, PHIPHI-component | Domains 1–2 |         |
| es.l_sZPHI   | $\text{if}(R_g > 0.001 * h, R/r, R_r) * (\text{spatial.invF13} * \text{es.l\_srphi} + \text{spatial.invF33} * \text{es.l\_szphi}) * \text{spatial.detF}$                                                                                                 | 1    | Spatial identity matrix, material frame, ZPHI-component   | Domains 1–2 |         |
| es.l_sRZ     | $(\text{spatial.invF13} * (\text{spatial.invF11} * \text{es.l\_srr} + \text{spatial.invF31} * \text{es.l\_sizr}) + \text{spatial.invF33} * (\text{spatial.invF11} * \text{es.l\_srz} + \text{spatial.invF31} * \text{es.l\_szz})) * \text{spatial.detF}$ | 1    | Spatial identity matrix, material frame, RZ-component     | Domains 1–2 |         |
| es.l_sPHIZ   | $\text{if}(R_g > 0.001 * h, R/r, R_r) * (\text{spatial.invF13} * \text{es.l\_sphir} + \text{spatial.invF33} * \text{es.l\_sphiz}) * \text{spatial.detF}$                                                                                                 | 1    | Spatial identity matrix, material frame, PHIZ-component   | Domains 1–2 |         |
| es.l_sZZ     | $(\text{spatial.invF13} * (\text{spatial.invF13} * \text{es.l\_srr} + \text{spatial.invF33} * \text{es.l\_sizr}) + \text{spatial.invF33} * (\text{spatial.invF13} * \text{es.l\_srz} + \text{spatial.invF33} * \text{es.l\_szz})) * \text{spatial.detF}$ | 1    | Spatial identity matrix, material frame, ZZ-component     | Domains 1–2 |         |
| es.l_srr     | 1                                                                                                                                                                                                                                                        | 1    | Spatial identity matrix, rr-component                     | Domains 1–2 |         |
| es.l_sphir   | 0                                                                                                                                                                                                                                                        | 1    | Spatial identity matrix, phir-component                   | Domains 1–2 |         |
| es.l_sizr    | 0                                                                                                                                                                                                                                                        | 1    | Spatial identity matrix, zir-component                    | Domains 1–2 |         |
| es.l_srphi   | 0                                                                                                                                                                                                                                                        | 1    | Spatial identity matrix, rphi-component                   | Domains 1–2 |         |
| es.l_sphiphi | 1                                                                                                                                                                                                                                                        | 1    | Spatial identity matrix, phiphi-                          | Domains 1–2 |         |

| Name       | Expression | Unit | Description                                           | Selection       | Details |
|------------|------------|------|-------------------------------------------------------|-----------------|---------|
|            |            |      | component                                             |                 |         |
| es.l_szphi | 0          | 1    | Spatial identity matrix, zphi-component               | Domains 1–2     |         |
| es.l_srz   | 0          | 1    | Spatial identity matrix, rz-component                 | Domains 1–2     |         |
| es.l_sphiz | 0          | 1    | Spatial identity matrix, phiz-component               | Domains 1–2     |         |
| es.l_szz   | 1          | 1    | Spatial identity matrix, zz-component                 | Domains 1–2     |         |
| es.unTr    | es.unTer   | Pa   | Maxwell upward surface stress tensor, r-component     | Boundaries 1–11 |         |
| es.unTphi  | es.unTephi | Pa   | Maxwell upward surface stress tensor, phi-component   | Boundaries 1–11 |         |
| es.unTz    | es.unTez   | Pa   | Maxwell upward surface stress tensor, z-component     | Boundaries 1–11 |         |
| es.dnTr    | es.dnTer   | Pa   | Maxwell downward surface stress tensor, r-component   | Boundaries 1–11 |         |
| es.dnTphi  | es.dnTephi | Pa   | Maxwell downward surface stress tensor, phi-component | Boundaries 1–11 |         |
| es.dnTz    | es.dnTez   | Pa   | Maxwell downward surface stress tensor, z-component   | Boundaries 1–11 |         |
| es.unr     | unr        |      | Normal vector up direction, r-component               | Boundaries 1–11 |         |

| Name       | Expression                                                                                                                                                                                                           | Unit | Description                                                  | Selection       | Details |
|------------|----------------------------------------------------------------------------------------------------------------------------------------------------------------------------------------------------------------------|------|--------------------------------------------------------------|-----------------|---------|
| es.unphi   | 0                                                                                                                                                                                                                    |      | Normal vector up direction, phi-component                    | Boundaries 1–11 |         |
| es.unz     | unz                                                                                                                                                                                                                  |      | Normal vector up direction, z-component                      | Boundaries 1–11 |         |
| es.dnr     | dnr                                                                                                                                                                                                                  |      | Normal vector down direction, r-component                    | Boundaries 1–11 |         |
| es.dnphi   | 0                                                                                                                                                                                                                    |      | Normal vector down direction, phi-component                  | Boundaries 1–11 |         |
| es.dnz     | dnz                                                                                                                                                                                                                  |      | Normal vector down direction, z-component                    | Boundaries 1–11 |         |
| es.unTer   | -<br>0.5*es.dnr*(real(up(es.Dr))*real(up(es.Er))+real(up(es.Dphi))*real(up(es.Ephi))+real(up(es.Dz))*real(up(es.Ez)))+real(up(es.Dr))*(real(up(es.Er))*es.dnr+real(up(es.Ephi))*es.dnphi+real(up(es.Ez))*es.dnz)     | Pa   | Maxwell upward electric surface stress tensor, r-component   | Boundary 4      |         |
| es.unTephi | -<br>0.5*es.dnphi*(real(up(es.Dr))*real(up(es.Er))+real(up(es.Dphi))*real(up(es.Ephi))+real(up(es.Dz))*real(up(es.Ez)))+real(up(es.Dphi))*(real(up(es.Er))*es.dnr+real(up(es.Ephi))*es.dnphi+real(up(es.Ez))*es.dnz) | Pa   | Maxwell upward electric surface stress tensor, phi-component | Boundary 4      |         |
| es.unTez   | -<br>0.5*es.dnz*(real(up(es.Dr))*real(up(es.Er))+real(up(es.Dphi))*real(up(es.Ephi))+real(up(es.Dz))*real(up(es.Ez)))+real(up(es.Dz))*(real(up(es.Er))*es.dnr+real(up(es.Ephi))*es.dnphi+real(up(es.Ez))*es.dnz)     | Pa   | Maxwell upward electric surface stress tensor, z-component   | Boundary 4      |         |



| Name       | Expression                                                                                                                                                                                                                                                                                                                                                                                                                                                                                                           | Unit | Description                                                    | Selection            | Details |
|------------|----------------------------------------------------------------------------------------------------------------------------------------------------------------------------------------------------------------------------------------------------------------------------------------------------------------------------------------------------------------------------------------------------------------------------------------------------------------------------------------------------------------------|------|----------------------------------------------------------------|----------------------|---------|
|            | $\text{al}(\text{up}(\text{es.Ez})) * \text{es.dnz}$                                                                                                                                                                                                                                                                                                                                                                                                                                                                 |      |                                                                |                      |         |
| es.unTer   | 0                                                                                                                                                                                                                                                                                                                                                                                                                                                                                                                    | Pa   | Maxwell upward electric surface stress tensor, r-component     | Boundaries 1–3, 5–11 |         |
| es.unTephi | 0                                                                                                                                                                                                                                                                                                                                                                                                                                                                                                                    | Pa   | Maxwell upward electric surface stress tensor, phi-component   | Boundaries 1–3, 5–11 |         |
| es.unTez   | 0                                                                                                                                                                                                                                                                                                                                                                                                                                                                                                                    | Pa   | Maxwell upward electric surface stress tensor, z-component     | Boundaries 1–3, 5–11 |         |
| es.dnTer   | -<br>$0.5 * \text{es.unr} * (\text{real}(\text{down}(\text{es.Dr})) * \text{real}(\text{down}(\text{es.Er})) + \text{real}(\text{down}(\text{es.Dphi})) * \text{real}(\text{down}(\text{es.Ephi})) + \text{real}(\text{down}(\text{es.Dz})) * \text{real}(\text{down}(\text{es.Ez}))) + \text{real}(\text{down}(\text{es.Dr})) * (\text{real}(\text{down}(\text{es.Er})) * \text{es.unr} + \text{real}(\text{down}(\text{es.Ephi})) * \text{es.unphi} + \text{real}(\text{down}(\text{es.Ez})) * \text{es.unz})$     | Pa   | Maxwell downward electric surface stress tensor, r-component   | Boundaries 1–11      |         |
| es.dnTephi | -<br>$0.5 * \text{es.unphi} * (\text{real}(\text{down}(\text{es.Dr})) * \text{real}(\text{down}(\text{es.Er})) + \text{real}(\text{down}(\text{es.Dphi})) * \text{real}(\text{down}(\text{es.Ephi})) + \text{real}(\text{down}(\text{es.Dz})) * \text{real}(\text{down}(\text{es.Ez}))) + \text{real}(\text{down}(\text{es.Dphi})) * (\text{real}(\text{down}(\text{es.Er})) * \text{es.unr} + \text{real}(\text{down}(\text{es.Ephi})) * \text{es.unphi} + \text{real}(\text{down}(\text{es.Ez})) * \text{es.unz})$ | Pa   | Maxwell downward electric surface stress tensor, phi-component | Boundaries 1–11      |         |
| es.dnTez   | -<br>$0.5 * \text{es.unz} * (\text{real}(\text{down}(\text{es.Dr})) * \text{real}(\text{down}(\text{es.Er})) + \text{real}(\text{down}(\text{es.Dphi})) * \text{real}(\text{down}(\text{es.Ephi})) + \text{real}(\text{down}(\text{es.Dz})) * \text{real}(\text{down}(\text{es.Ez}))) + \text{real}(\text{down}(\text{es.Dz})) * (\text{real}(\text{down}(\text{es.Er})) * \text{es.unr} + \text{real}(\text{down}(\text{es.Ephi})) * \text{es.unphi} + \text{real}(\text{down}(\text{es.Ez})) * \text{es.unz})$     | Pa   | Maxwell downward electric surface stress tensor, z-component   | Boundaries 1–11      |         |

| Name     | Expression                                                                                                                                                        | Unit     | Description           | Selection | Details     |
|----------|-------------------------------------------------------------------------------------------------------------------------------------------------------------------|----------|-----------------------|-----------|-------------|
|          | $w_n(\text{es.E}_r) * \text{es.un}_r + \text{real}(\text{down}(\text{es.E}_\phi)) * \text{es.un}_\phi + \text{real}(\text{down}(\text{es.E}_z)) * \text{es.un}_z$ |          |                       |           |             |
| es.intWe | es.int_We(es.d*es.dWe)                                                                                                                                            | J        | Total electric energy | Global    | + operation |
| es.zref  | 50[ohm]                                                                                                                                                           | $\Omega$ | Reference impedance   | Global    |             |

### 2.4.3 Charge Conservation 1

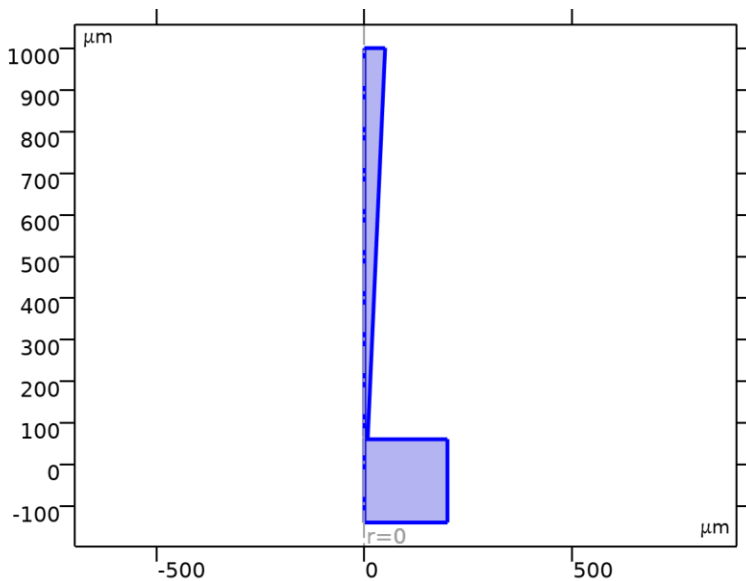

Charge Conservation 1

#### SELECTION

|                        |                                          |
|------------------------|------------------------------------------|
| Geometric entity level | Domain                                   |
| Selection              | Geometry geom1: Dimension 2: All domains |

#### EQUATIONS

$$\mathbf{E} = -\nabla V$$

$$\nabla \cdot (\epsilon_0 \epsilon_r \mathbf{E}) = \rho_v$$

#### Constitutive Relation D-E

##### SETTINGS

| Description           | Value                 |
|-----------------------|-----------------------|
| Dielectric model      | Relative permittivity |
| Relative permittivity | User defined          |

| Description           | Value |
|-----------------------|-------|
| Relative permittivity | 81    |

## Coordinate System Selection

### SETTINGS

| Description       | Value                    |
|-------------------|--------------------------|
| Coordinate system | Global coordinate system |

## Variables

| Name              | Expression | Unit             | Description                             | Selection       | Details     |
|-------------------|------------|------------------|-----------------------------------------|-----------------|-------------|
| es.nD             | 0          | C/m <sup>2</sup> | Surface charge density                  | Boundaries 1–11 | + operation |
| es.epsilonrrr     | 81         | 1                | Relative permittivity, rr-component     | Domains 1–2     |             |
| es.epsilonrphir   | 0          | 1                | Relative permittivity, phir-component   | Domains 1–2     |             |
| es.epsilonrzz     | 0          | 1                | Relative permittivity, zr-component     | Domains 1–2     |             |
| es.epsilonrrphi   | 0          | 1                | Relative permittivity, rphi-component   | Domains 1–2     |             |
| es.epsilonrphiphi | 81         | 1                | Relative permittivity, phiphi-component | Domains 1–2     |             |
| es.epsilonrzphi   | 0          | 1                | Relative permittivity, zphi-component   | Domains 1–2     |             |
| es.epsilonrrz     | 0          | 1                | Relative permittivity, rz-component     | Domains 1–2     |             |
| es.epsilonrphiz   | 0          | 1                | Relative permittivity, phiz-component   | Domains 1–2     |             |
| es.epsilonrzz     | 81         | 1                | Relative permittivity, zz-component     | Domains 1–2     |             |
| es.epsilonr_iso   | 81         | 1                | Relative permittivity, isotropic value  | Domains 1–2     |             |

| Name     | Expression                                                                                                                                                                                                                                                               | Unit             | Description                                   | Selection   | Details |
|----------|--------------------------------------------------------------------------------------------------------------------------------------------------------------------------------------------------------------------------------------------------------------------------|------------------|-----------------------------------------------|-------------|---------|
| es.DrR   | 0                                                                                                                                                                                                                                                                        | C/m <sup>2</sup> | Remanent electric displacement, R-component   | Domains 1–2 |         |
| es.DrPHI | 0                                                                                                                                                                                                                                                                        | C/m <sup>2</sup> | Remanent electric displacement, PHI-component | Domains 1–2 |         |
| es.DrZ   | 0                                                                                                                                                                                                                                                                        | C/m <sup>2</sup> | Remanent electric displacement, Z-component   | Domains 1–2 |         |
| es.Dr    | $\epsilon_0 \text{const} \cdot \text{es.l\_srr} \cdot \text{es.Er} + \epsilon_0 \text{const} \cdot \text{es.l\_srphi} \cdot \text{es.Ephi} + \epsilon_0 \text{const} \cdot \text{es.l\_srz} \cdot \text{es.Ez} + \text{es.Pr} + \text{es.Per} + \text{es.Phr}$           | C/m <sup>2</sup> | Electric displacement field, r-component      | Domains 1–2 |         |
| es.Dphi  | $\epsilon_0 \text{const} \cdot \text{es.l\_spher} \cdot \text{es.Er} + \epsilon_0 \text{const} \cdot \text{es.l\_sphphi} \cdot \text{es.Ephi} + \epsilon_0 \text{const} \cdot \text{es.l\_sphz} \cdot \text{es.Ez} + \text{es.Pphi} + \text{es.Pephi} + \text{es.Phphi}$ | C/m <sup>2</sup> | Electric displacement field, phi-component    | Domains 1–2 |         |
| es.Dz    | $\epsilon_0 \text{const} \cdot \text{es.l\_sizr} \cdot \text{es.Er} + \epsilon_0 \text{const} \cdot \text{es.l\_szphi} \cdot \text{es.Ephi} + \epsilon_0 \text{const} \cdot \text{es.l\_szz} \cdot \text{es.Ez} + \text{es.Pz} + \text{es.Pez} + \text{es.Phz}$          | C/m <sup>2</sup> | Electric displacement field, z-component      | Domains 1–2 |         |
| es.Pr    | $\epsilon_0 \text{const} \cdot (\text{es.chirr} \cdot \text{es.Er} + \text{es.chirphi} \cdot \text{es.Ephi} + \text{es.chirz} \cdot \text{es.Ez})$                                                                                                                       | C/m <sup>2</sup> | Polarization, r-component                     | Domains 1–2 |         |
| es.Pphi  | $\epsilon_0 \text{const} \cdot (\text{es.chiphir} \cdot \text{es.Er} + \text{es.chiphphi} \cdot \text{es.Ephi} + \text{es.chiphz} \cdot \text{es.Ez})$                                                                                                                   | C/m <sup>2</sup> | Polarization, phi-component                   | Domains 1–2 |         |
| es.Pz    | $\epsilon_0 \text{const} \cdot (\text{es.chizr} \cdot \text{es.Er} + \text{es.chizphi} \cdot \text{es.Ephi} + \text{es.chizz} \cdot \text{es.Ez})$                                                                                                                       | C/m <sup>2</sup> | Polarization, z-component                     | Domains 1–2 |         |
| es.normD | $\text{sqrt}(\text{realdot}(\text{es.Dr}, \text{es.}))$                                                                                                                                                                                                                  | C/m <sup>2</sup> | Electric                                      | Domains 1–2 |         |

| Name        | Expression                                                                                              | Unit             | Description                                | Selection   | Details     |
|-------------|---------------------------------------------------------------------------------------------------------|------------------|--------------------------------------------|-------------|-------------|
|             | $Dr + \text{realdot}(es.Dphi, es.Dphi) + \text{realdot}(es.Dz, es.Dz)$                                  |                  | displacement field norm                    |             |             |
| es.normP    | $\sqrt{\text{realdot}(es.Pr, es.Pr) + \text{realdot}(es.Pphi, es.Pphi) + \text{realdot}(es.Pz, es.Pz)}$ | C/m <sup>2</sup> | Polarization norm                          | Domains 1–2 |             |
| es.Per      | 0                                                                                                       | C/m <sup>2</sup> | Polarization contribution, r-component     | Domains 1–2 | + operation |
| es.Pephi    | 0                                                                                                       | C/m <sup>2</sup> | Polarization contribution, phi-component   | Domains 1–2 | + operation |
| es.Pez      | 0                                                                                                       | C/m <sup>2</sup> | Polarization contribution, z-component     | Domains 1–2 | + operation |
| es.Phr      | 0                                                                                                       | C/m <sup>2</sup> | Polarization contribution, r-component     | Domains 1–2 | + operation |
| es.Phphi    | 0                                                                                                       | C/m <sup>2</sup> | Polarization contribution, phi-component   | Domains 1–2 | + operation |
| es.Phz      | 0                                                                                                       | C/m <sup>2</sup> | Polarization contribution, z-component     | Domains 1–2 | + operation |
| es.chirr    | $-1 + es.\epsilon_{rrr}$                                                                                | 1                | Electric susceptibility, rr-component      | Domains 1–2 |             |
| es.chiphir  | $es.\epsilon_{rphi}$                                                                                    | 1                | Electric susceptibility, phi-r-component   | Domains 1–2 |             |
| es.chizr    | $es.\epsilon_{rz}$                                                                                      | 1                | Electric susceptibility, zr-component      | Domains 1–2 |             |
| es.chirphi  | $es.\epsilon_{rphi}$                                                                                    | 1                | Electric susceptibility, rphi-component    | Domains 1–2 |             |
| es.chiphphi | $-1 + es.\epsilon_{rphi}$                                                                               | 1                | Electric susceptibility, phi-phi-component | Domains 1–2 |             |
| es.chizphi  | $es.\epsilon_{rz}$                                                                                      | 1                | Electric susceptibility,                   | Domains 1–2 |             |

| Name       | Expression                                                                                                                                        | Unit             | Description                              | Selection       | Details     |
|------------|---------------------------------------------------------------------------------------------------------------------------------------------------|------------------|------------------------------------------|-----------------|-------------|
|            |                                                                                                                                                   |                  | zphi-component                           |                 |             |
| es.chirz   | es.epsilonrrz                                                                                                                                     | 1                | Electric susceptibility, rz-component    | Domains 1–2     |             |
| es.chiphiz | es.epsilonrphiz                                                                                                                                   | 1                | Electric susceptibility, phiz-component  | Domains 1–2     |             |
| es.chizz   | -1+es.epsilonrzz                                                                                                                                  | 1                | Electric susceptibility, zz-component    | Domains 1–2     |             |
| es.Er      | -Vr                                                                                                                                               | V/m              | Electric field, r-component              | Domains 1–2     |             |
| es.Ephi    | 0                                                                                                                                                 | V/m              | Electric field, phi-component            | Domains 1–2     |             |
| es.Ez      | -Vz                                                                                                                                               | V/m              | Electric field, z-component              | Domains 1–2     |             |
| es.tEr     | -VTr                                                                                                                                              | V/m              | Tangential electric field, r-component   | Boundaries 1–11 |             |
| es.tEphi   | 0                                                                                                                                                 | V/m              | Tangential electric field, phi-component | Boundaries 1–11 |             |
| es.tEz     | -VTz                                                                                                                                              | V/m              | Tangential electric field, z-component   | Boundaries 1–11 |             |
| es.normE   | $\sqrt{\text{realdot}(\text{es.Er}, \text{es.Er}) + \text{realdot}(\text{es.Ephi}, \text{es.Ephi}) + \text{realdot}(\text{es.Ez}, \text{es.Ez})}$ | V/m              | Electric field norm                      | Domains 1–2     |             |
| es.Jr      | es.Jdr                                                                                                                                            | A/m <sup>2</sup> | Current density, r-component             | Domains 1–2     | + operation |
| es.Jphi    | es.Jdphi                                                                                                                                          | A/m <sup>2</sup> | Current density, phi-component           | Domains 1–2     | + operation |
| es.Jz      | es.Jdz                                                                                                                                            | A/m <sup>2</sup> | Current density, z-component             | Domains 1–2     | + operation |
| es.JR      | $(\text{spatial.invF11} * \text{es.Jdr} + \text{spatial.invF31} * \text{es.Jdz}) * \text{spatial.detF}$                                           | A/m <sup>2</sup> | Current density, R-component             | Domains 1–2     | + operation |
| es.JPHI    | $\text{if}(\text{Rg} > 0.001 * \text{h}, \text{R}/\text{r}, \text{Rr}) * \text{es.Jdphi} * \text{spatial.detF}$                                   | A/m <sup>2</sup> | Current density, PHI-component           | Domains 1–2     | + operation |
| es.JZ      | $\text{spatial.invF13} * \text{es.Jdr}$                                                                                                           | A/m <sup>2</sup> | Current density,                         | Domains 1–2     | + operation |

| Name       | Expression                                                                                                                                                                                                                                                                                                                                                                                                                                                                                                                                                                                             | Unit             | Description                                 | Selection            | Details     |
|------------|--------------------------------------------------------------------------------------------------------------------------------------------------------------------------------------------------------------------------------------------------------------------------------------------------------------------------------------------------------------------------------------------------------------------------------------------------------------------------------------------------------------------------------------------------------------------------------------------------------|------------------|---------------------------------------------|----------------------|-------------|
|            | $+\text{spatial.invf33}*\text{es.Jdz}*\text{spatial.detF}$                                                                                                                                                                                                                                                                                                                                                                                                                                                                                                                                             |                  | Z-component                                 |                      |             |
| es.Jdr     | 0                                                                                                                                                                                                                                                                                                                                                                                                                                                                                                                                                                                                      | A/m <sup>2</sup> | Displacement current density, r-component   | Domains 1–2          |             |
| es.Jdphi   | 0                                                                                                                                                                                                                                                                                                                                                                                                                                                                                                                                                                                                      | A/m <sup>2</sup> | Displacement current density, phi-component | Domains 1–2          |             |
| es.Jdz     | 0                                                                                                                                                                                                                                                                                                                                                                                                                                                                                                                                                                                                      | A/m <sup>2</sup> | Displacement current density, z-component   | Domains 1–2          |             |
| es.normJ   | $\text{sqrt}(\text{realdot}(\text{es.Jr}, \text{es.Jr}) + \text{realdot}(\text{es.Jphi}, \text{es.Jphi}) + \text{realdot}(\text{es.Jz}, \text{es.Jz}))$                                                                                                                                                                                                                                                                                                                                                                                                                                                | A/m <sup>2</sup> | Current density norm                        | Domains 1–2          |             |
| es.ccn1.nJ | $\text{es.unr}*\text{down}(\text{es.Jr}) + \text{es.unphi}*\text{down}(\text{es.Jphi}) + \text{es.unz}*\text{down}(\text{es.Jz})$                                                                                                                                                                                                                                                                                                                                                                                                                                                                      | A/m <sup>2</sup> | Inward current density                      | Boundaries 1–3, 5–11 |             |
| es.W       | es.We                                                                                                                                                                                                                                                                                                                                                                                                                                                                                                                                                                                                  | J/m <sup>3</sup> | Energy density                              | Domains 1–2          | + operation |
| es.dWe     | $2*\text{es.We}*\text{pi}*r$                                                                                                                                                                                                                                                                                                                                                                                                                                                                                                                                                                           | J/m <sup>2</sup> | Integrand for total electric energy         | Domains 1–2          | Meta        |
| es.We      | $0.5*\text{epsilon0\_const}*((\text{es.l\_srr} + \text{es.chirr})*\text{es.Er} + (\text{es.l\_srphi} + \text{es.chirphi})*\text{es.Ephi} + (\text{es.l\_srz} + \text{es.chirz})*\text{es.Ez})*\text{es.Er} + ((\text{es.l\_spher} + \text{es.chiphir})*\text{es.Er} + (\text{es.l\_spherphi} + \text{es.chiphphi})*\text{es.Ephi} + (\text{es.l\_spherz} + \text{es.chiphiz})*\text{es.Ez})*\text{es.Ephi} + ((\text{es.l\_spherz} + \text{es.chizr})*\text{es.Er} + (\text{es.l\_spherphi} + \text{es.chizrphi})*\text{es.Ephi} + (\text{es.l\_spherz} + \text{es.chizz})*\text{es.Ez})*\text{es.Ez}$ | J/m <sup>3</sup> | Electric energy density                     | Domains 1–2          |             |

### Shape functions

| Name | Shape function       | Unit | Description        | Shape frame | Selection   |
|------|----------------------|------|--------------------|-------------|-------------|
| V    | Lagrange (Quadratic) | V    | Electric potential | Spatial     | Domains 1–2 |
| V    | Lagrange (Quadratic) | V    | Electric potential | Material    | Domains 1–2 |

| Name | Shape function       | Unit | Description        | Shape frame | Selection   |
|------|----------------------|------|--------------------|-------------|-------------|
| V    | Lagrange (Quadratic) | V    | Electric potential | Geometry    | Domains 1–2 |
| V    | Lagrange (Quadratic) | V    | Electric potential | Mesh        | Domains 1–2 |

### Weak Expressions

| Weak expression                                      | Integration order | Integration frame | Selection   |
|------------------------------------------------------|-------------------|-------------------|-------------|
| -<br>2*(es.Dr*test(Vr)+es.Dz*test(Vz))*es.<br>d*pi*r | 4                 | Spatial           | Domains 1–2 |

### 2.4.4 Axial Symmetry 1

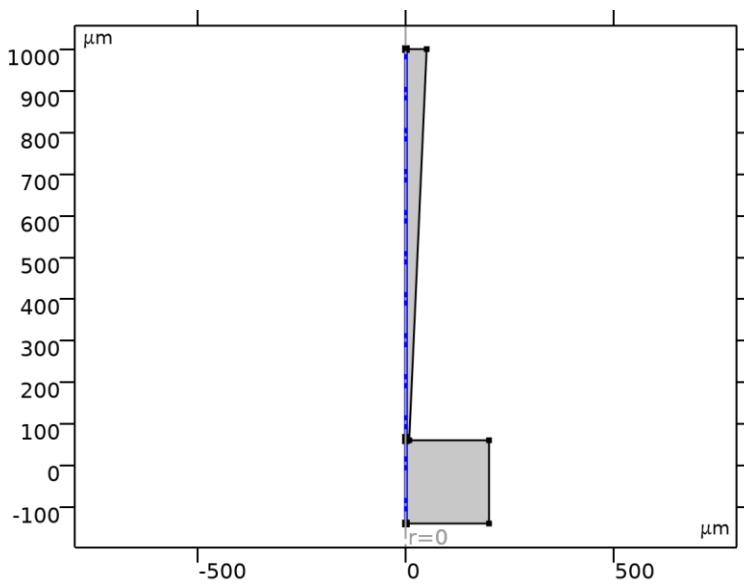

#### Axial Symmetry 1

##### SELECTION

|                        |                                             |
|------------------------|---------------------------------------------|
| Geometric entity level | Boundary                                    |
| Selection              | Geometry geom1: Dimension 1: All boundaries |



## 2.4.5 Zero Charge 1

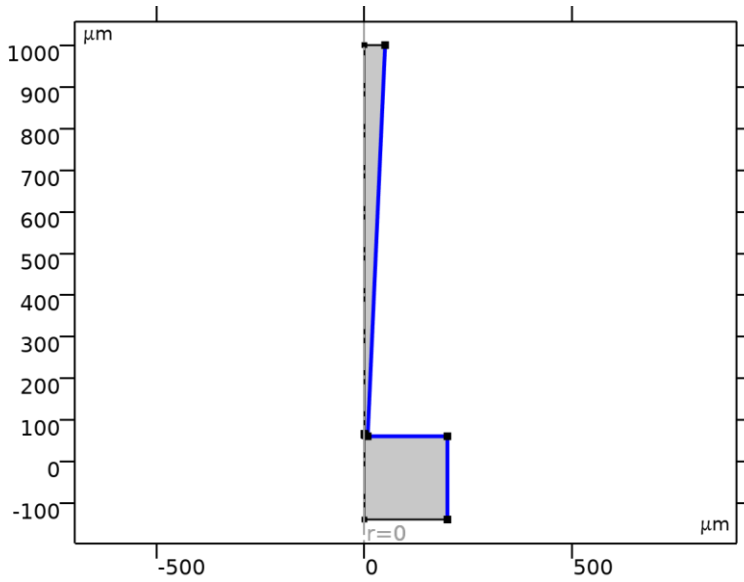

Zero Charge 1

### SELECTION

|                        |                                             |
|------------------------|---------------------------------------------|
| Geometric entity level | Boundary                                    |
| Selection              | Geometry geom1: Dimension 1: All boundaries |

### EQUATIONS

$$\mathbf{n} \cdot \mathbf{D} = 0$$

### Variables

| Name  | Expression | Unit             | Description            | Selection       | Details     |
|-------|------------|------------------|------------------------|-----------------|-------------|
| es.nD | 0          | C/m <sup>2</sup> | Surface charge density | Boundaries 7–11 | + operation |

### Shape functions

| Name | Shape function       | Unit | Description        | Shape frame | Selection     | Details |
|------|----------------------|------|--------------------|-------------|---------------|---------|
| V    | Lagrange (Quadratic) | V    | Electric potential | Spatial     | No boundaries | Slit    |
| V    | Lagrange (Quadratic) | V    | Electric potential | Material    | No boundaries | Slit    |
| V    | Lagrange (Quadratic) | V    | Electric potential | Geometry    | No boundaries | Slit    |
| V    | Lagrange (Quadratic) | V    | Electric potential | Mesh        | No boundaries | Slit    |

## 2.4.6 Initial Values 1

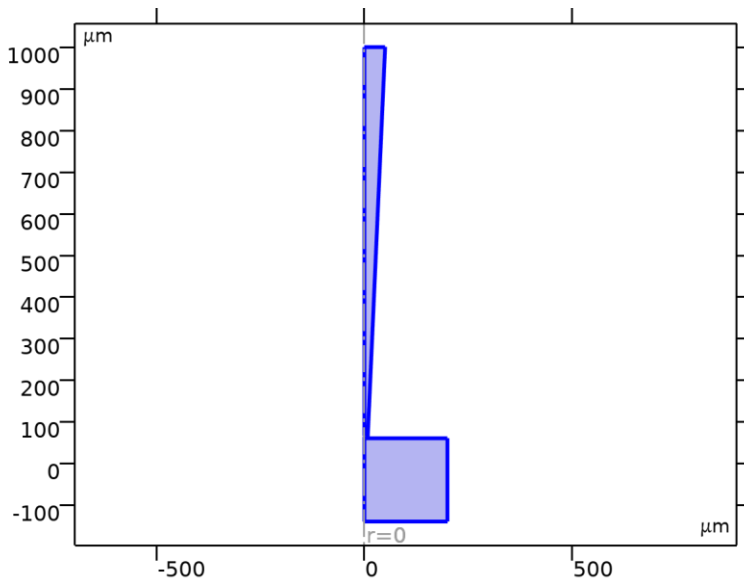

*Initial Values 1*

### SELECTION

|                        |                                          |
|------------------------|------------------------------------------|
| Geometric entity level | Domain                                   |
| Selection              | Geometry geom1: Dimension 2: All domains |

### SETTINGS

| Description        | Value | Unit |
|--------------------|-------|------|
| Electric potential | 0     | V    |

## 2.4.7 Electric Potential 1

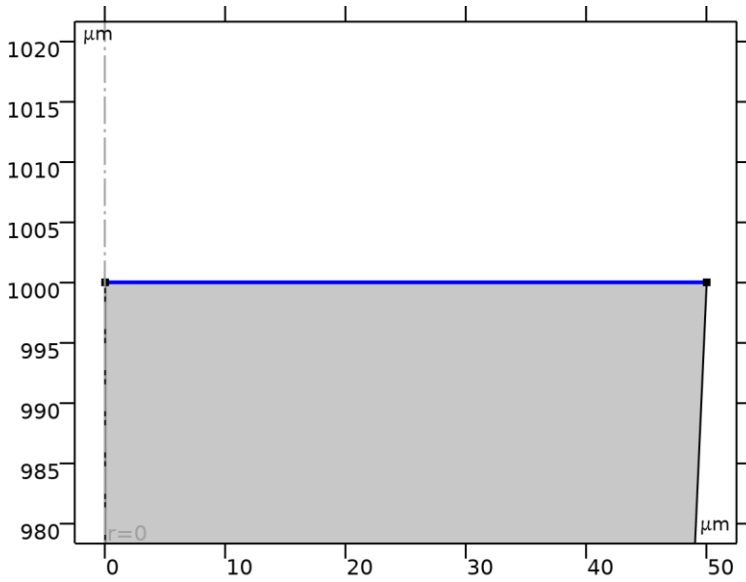

Electric Potential 1

### SELECTION

|                        |                                         |
|------------------------|-----------------------------------------|
| Geometric entity level | Boundary                                |
| Selection              | Geometry geom1: Dimension 1: Boundary 6 |

### EQUATIONS

$$V = V_0$$

### Electric Potential

#### SETTINGS

| Description        | Value | Unit |
|--------------------|-------|------|
| Electric potential | 0.1   | V    |

### Variables

| Name  | Expression                                                                                                | Unit             | Description            | Selection  | Details     |
|-------|-----------------------------------------------------------------------------------------------------------|------------------|------------------------|------------|-------------|
| es.nD | $es.unr \cdot \text{down}(es.Dr) + es.unphi \cdot \text{down}(es.Dphi) + es.unz \cdot \text{down}(es.Dz)$ | C/m <sup>2</sup> | Surface charge density | Boundary 6 | + operation |
| es.V0 | 0.1                                                                                                       | V                | Electric potential     | Boundary 6 |             |

### Constraints

| Constraint | Constraint force | Shape function       | Selection  | Details   |
|------------|------------------|----------------------|------------|-----------|
| es.V0-V    | test(es.V0-V)    | Lagrange (Quadratic) | Boundary 6 | Elemental |

## 2.4.8 Ground 1

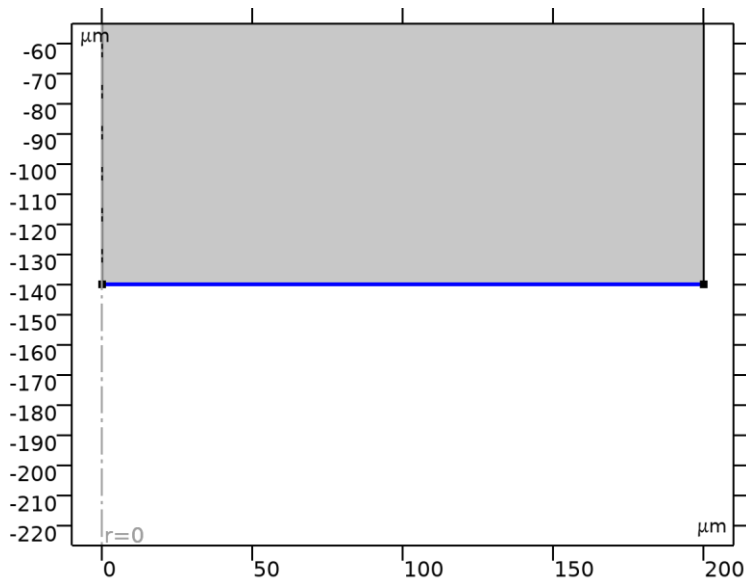

Ground 1

### SELECTION

|                        |                                         |
|------------------------|-----------------------------------------|
| Geometric entity level | Boundary                                |
| Selection              | Geometry geom1: Dimension 1: Boundary 2 |

### EQUATIONS

$$V = 0$$

### Variables

| Name  | Expression                                                                                                | Unit             | Description            | Selection  | Details     |
|-------|-----------------------------------------------------------------------------------------------------------|------------------|------------------------|------------|-------------|
| es.nD | $es.unr \cdot \text{down}(es.Dr) + es.unphi \cdot \text{down}(es.Dphi) + es.unz \cdot \text{down}(es.Dz)$ | C/m <sup>2</sup> | Surface charge density | Boundary 2 | + operation |

### Constraints

| Constraint | Constraint force | Shape function       | Selection  | Details   |
|------------|------------------|----------------------|------------|-----------|
| -V         | test(-V)         | Lagrange (Quadratic) | Boundary 2 | Elemental |

## 2.4.9 Space Charge Density 1

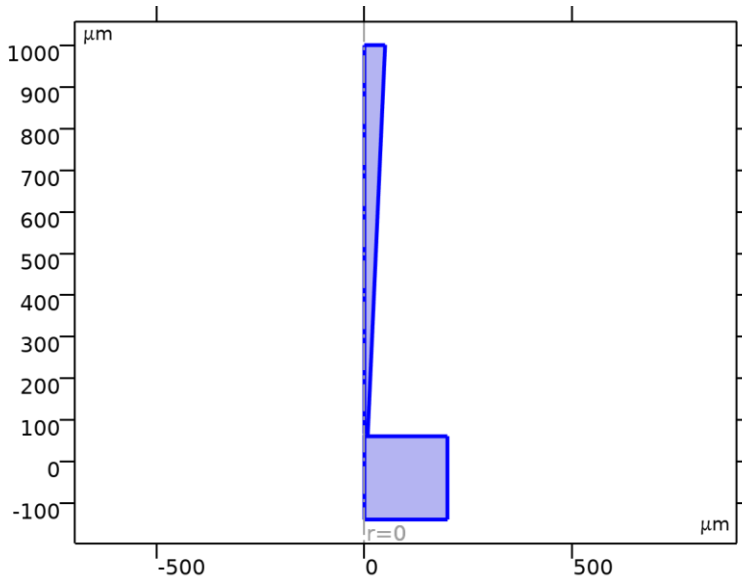

Space Charge Density 1

### SELECTION

|                        |                                          |
|------------------------|------------------------------------------|
| Geometric entity level | Domain                                   |
| Selection              | Geometry geom1: Dimension 2: Domains 1–2 |

### EQUATIONS

$$\nabla \cdot \mathbf{D} = \rho_v$$

### Coordinate System Selection

#### SETTINGS

| Description       | Value                    |
|-------------------|--------------------------|
| Coordinate system | Global coordinate system |

### Variables

| Name         | Expression             | Unit             | Description          | Selection   | Details     |
|--------------|------------------------|------------------|----------------------|-------------|-------------|
| es.scd1.rhoq | (cNa-cCl)*96480[C/mol] | C/m <sup>3</sup> | Space charge density | Domains 1–2 |             |
| es.rhoq      | es.scd1.rhoq           | C/m <sup>3</sup> | Space charge density | Domains 1–2 | + operation |

### Weak Expressions

| Weak expression                   | Integration order | Integration frame | Selection   |
|-----------------------------------|-------------------|-------------------|-------------|
| -2*es.scd1.rhoq*test(V)*es.d*pi*r | 4                 | Spatial           | Domains 1–2 |

## 2.5 MESH 1

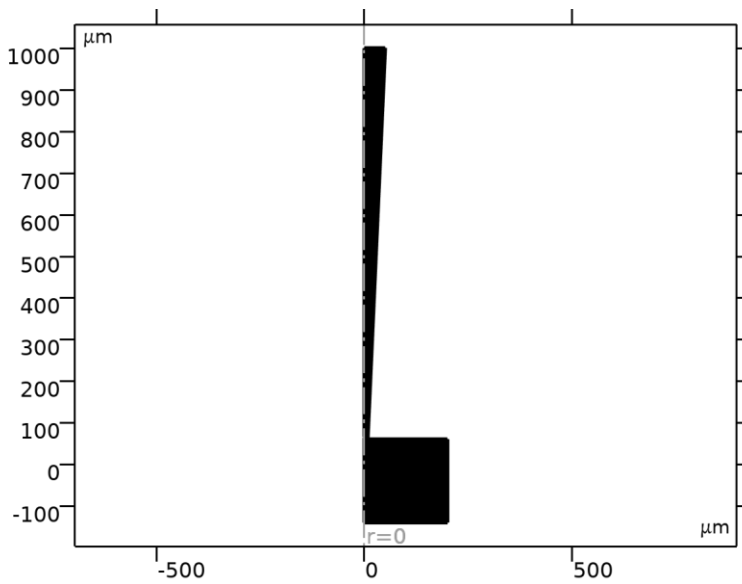

*Mesh 1*

### MESH STATISTICS

| Description             | Value                 |
|-------------------------|-----------------------|
| Status                  | Complete mesh         |
| Mesh vertices           | 52659                 |
| Triangles               | 97727                 |
| Quads                   | 2704                  |
| Edge elements           | 2200                  |
| Vertex elements         | 10                    |
| Number of elements      | 100431                |
| Minimum element quality | 0.3148                |
| Average element quality | 0.9546                |
| Element area ratio      | 0.0069865             |
| Mesh area               | 67260 $\mu\text{m}^2$ |

### 2.5.1 Size (size)

#### SETTINGS

| Description          | Value          |
|----------------------|----------------|
| Calibrate for        | Fluid dynamics |
| Maximum element size | 1.34           |
| Minimum element size | 0.004          |
| Curvature factor     | 0.2            |

| Description                 | Value          |
|-----------------------------|----------------|
| Maximum element growth rate | 1.05           |
| Predefined size             | Extremely fine |

## 2.5.2 Free Triangular 1 (ftri1)

### SELECTION

|                        |                |
|------------------------|----------------|
| Geometric entity level | Domain         |
| Selection              | Geometry geom1 |

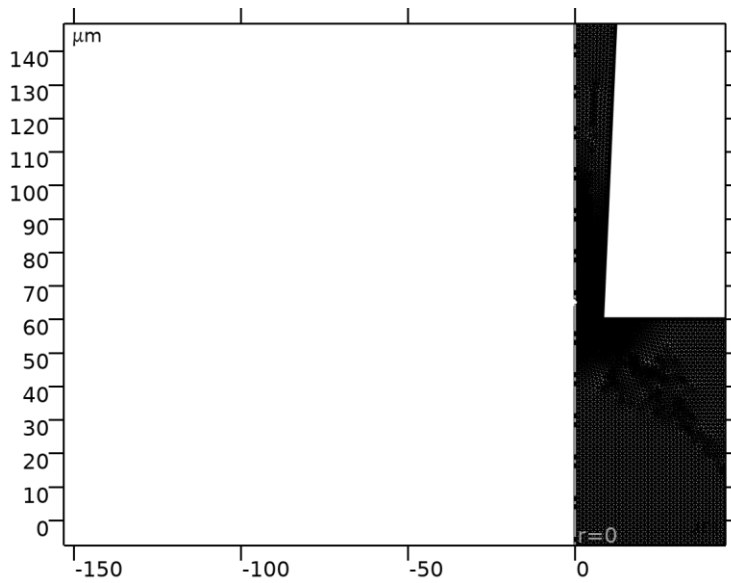

*Free Triangular 1*

### INFORMATION

| Description     | Value   |
|-----------------|---------|
| Last build time | Unknown |

### Size 1 (size1)

#### SELECTION

|                        |                |
|------------------------|----------------|
| Geometric entity level | Domain         |
| Selection              | Geometry geom1 |

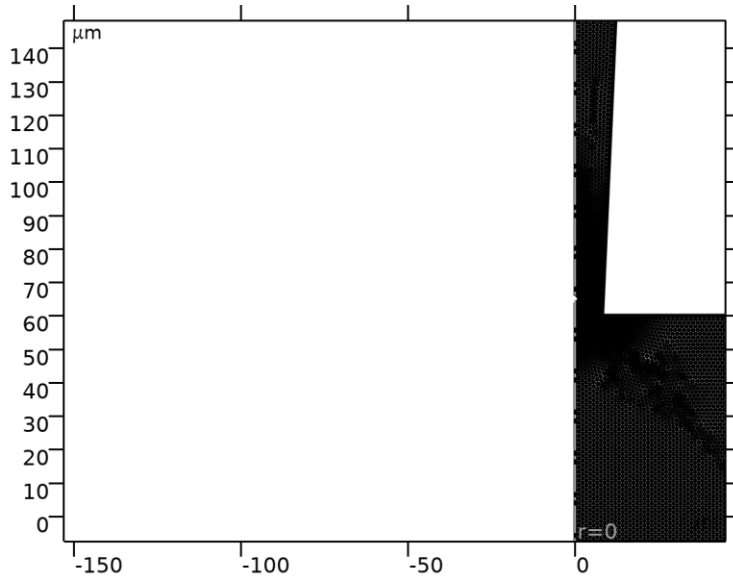

Size 1

#### SETTINGS

| Description                 | Value          |
|-----------------------------|----------------|
| Calibrate for               | Fluid dynamics |
| Maximum element size        | 1.34           |
| Minimum element size        | 0.004          |
| Curvature factor            | 0.2            |
| Maximum element growth rate | 1.05           |
| Predefined size             | Extremely fine |

Size 2 (size2)

#### SELECTION

|                        |                                                  |
|------------------------|--------------------------------------------------|
| Geometric entity level | Boundary                                         |
| Selection              | Geometry geom1: Dimension 1: Boundaries 4, 10–11 |



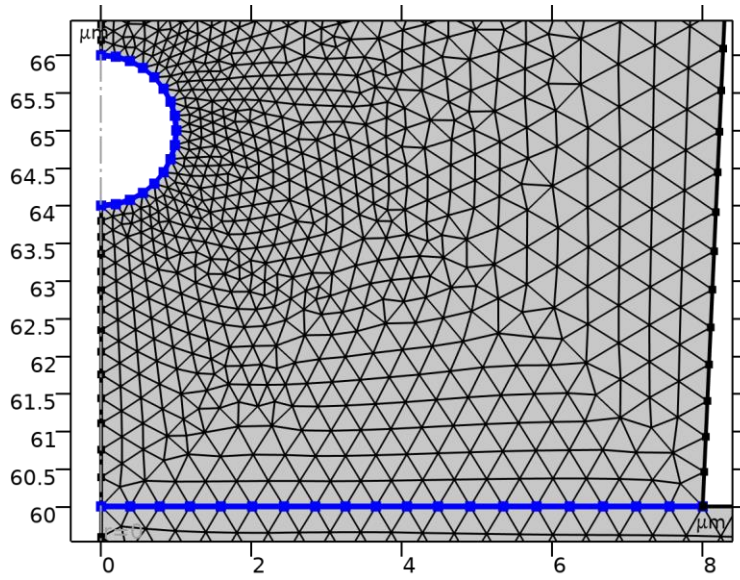

Size 2

#### SETTINGS

| Description                 | Value          |
|-----------------------------|----------------|
| Calibrate for               | Semiconductor  |
| Maximum element size        | 0.456          |
| Minimum element size        | 0.0912         |
| Curvature factor            | 0.2            |
| Maximum element growth rate | 1.05           |
| Predefined size             | Extremely fine |

#### Corner Refinement 1 (cr1)

##### SELECTION

|                        |                |
|------------------------|----------------|
| Geometric entity level | Domain         |
| Selection              | Geometry geom1 |



*Corner Refinement 1*

### 2.5.3 Boundary Layers 1 (bl1)

#### SELECTION

|                        |                |
|------------------------|----------------|
| Geometric entity level | Domain         |
| Selection              | Geometry geom1 |

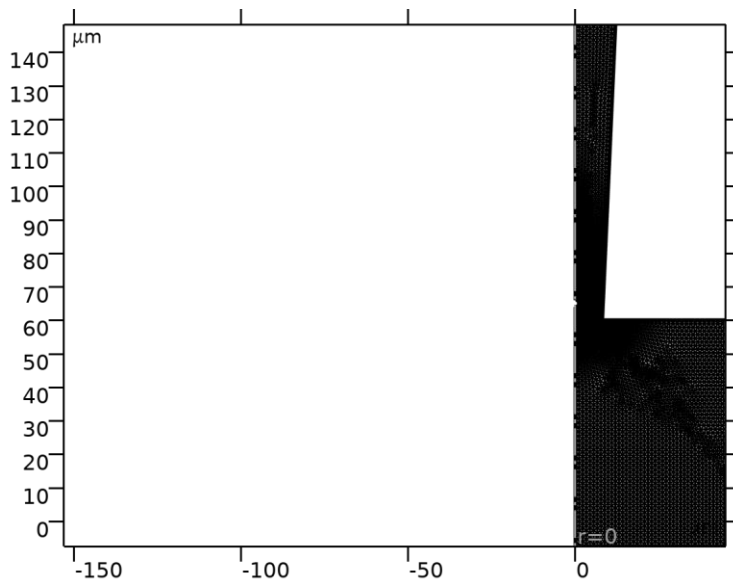

*Boundary Layers 1*

#### INFORMATION

| Description | Value              |
|-------------|--------------------|
| Method      | Legacy version 6.0 |

| Description     | Value   |
|-----------------|---------|
| Last build time | Unknown |

### Boundary Layer Properties (blp)

#### SELECTION

|                        |                                                 |
|------------------------|-------------------------------------------------|
| Geometric entity level | Boundary                                        |
| Selection              | Geometry geom1: Dimension 1: Boundaries 2, 6, 9 |

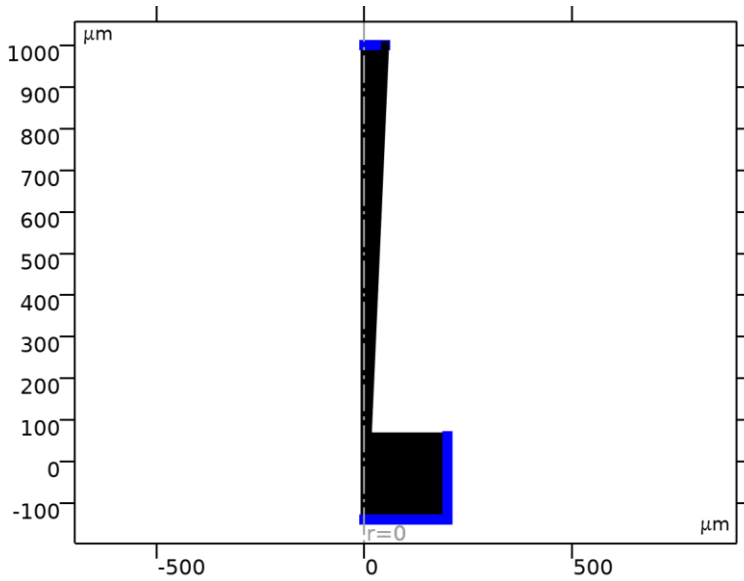

*Boundary Layer Properties*

### 3 Study 1

#### COMPUTATION INFORMATION

|                  |      |
|------------------|------|
| Computation time | 16 s |
|------------------|------|

#### 3.1 STATIONARY

##### STUDY SETTINGS

| Description                    | Value |
|--------------------------------|-------|
| Include geometric nonlinearity | Off   |

##### PHYSICS AND VARIABLES SELECTION

| Physics interface                  | Solve for | Equation form          |
|------------------------------------|-----------|------------------------|
| Transport of Diluted Species (tds) | On        | Automatic (Stationary) |
| Electrostatics (es)                | On        | Automatic (Stationary) |

##### STORE IN OUTPUT

| Interface                          | Output             | Selection |
|------------------------------------|--------------------|-----------|
| Transport of Diluted Species (tds) | Physics controlled |           |
| Electrostatics (es)                | Physics controlled |           |

##### MESH SELECTION

| Component   | Mesh   |
|-------------|--------|
| Component 1 | Mesh 1 |

#### 3.2 SOLVER CONFIGURATIONS

##### 3.2.1 Solution 1

##### Compile Equations: Stationary (st1)

##### STUDY AND STEP

| Description    | Value                   |
|----------------|-------------------------|
| Use study      | <a href="#">Study 1</a> |
| Use study step | Stationary              |

##### LOG

```

<---- Compile Equations: Stationary in Study 1/Solution 1 (sol1) -----
Started at 12-Feb-2024 14:05:07.
Geometry shape order: Linear
Running on Intel64 Family 6 Model 183 Stepping 1, GenuineIntel.
Using 1 socket with 32 cores in total on DS034675.
Available memory: 65.22 GB.
Time: 1 s.
Physical memory: 1.72 GB
Virtual memory: 1.85 GB
Ended at 12-Feb-2024 14:05:07.
----- Compile Equations: Stationary in Study 1/Solution 1 (sol1) ----->

```

## Dependent Variables 1 (v1)

### GENERAL

| Description           | Value                              |
|-----------------------|------------------------------------|
| Defined by study step | <a href="#">Step 1: Stationary</a> |

## Concentration (comp1.cCl) (comp1\_cCl)

### GENERAL

| Description        | Value                              |
|--------------------|------------------------------------|
| Field components   | comp1.cCl                          |
| Internal variables | {comp1.uflux.cCl, comp1.dflux.cCl} |

## Concentration (comp1.cNa) (comp1\_cNa)

### GENERAL

| Description        | Value                              |
|--------------------|------------------------------------|
| Field components   | comp1.cNa                          |
| Internal variables | {comp1.uflux.cNa, comp1.dflux.cNa} |

## Inverse time step measure (comp1.tds.dt2Inv\_cCl) (comp1\_tds\_dt2Inv\_cCl)

### GENERAL

| Description          | Value                |
|----------------------|----------------------|
| Field components     | comp1.tds.dt2Inv_cCl |
| Solve for this field | Off                  |

## Inverse time step measure (comp1.tds.dt2Inv\_cNa) (comp1\_tds\_dt2Inv\_cNa)

### GENERAL

| Description          | Value                |
|----------------------|----------------------|
| Field components     | comp1.tds.dt2Inv_cNa |
| Solve for this field | Off                  |

### Electric potential (comp1.V) (comp1\_V)

#### GENERAL

| Description      | Value   |
|------------------|---------|
| Field components | comp1.V |

### Stationary Solver 1 (s1)

#### GENERAL

| Description           | Value                              |
|-----------------------|------------------------------------|
| Defined by study step | <a href="#">Step 1: Stationary</a> |

#### LOG

```

<---- Stationary Solver 1 in Study 1/Solution 1 (sol1) -----
Started at 12-Feb-2024 14:05:08.
Nonlinear solver
Number of degrees of freedom solved for: 313770 (plus 4462 internal DOFs).
Nonsymmetric matrix found.
Scales for dependent variables:
Concentration (comp1.cCl): 1.5e+002
Concentration (comp1.cNa): 1.9e+002
Electric potential (comp1.V): 1e+002
Orthonormal null-space function used.
Iter      SolEst      ResEst      Damping      Stepsize #Res #Jac #Sol   LinErr   LinRe
s
  1        0.33       1e+007     0.0100000    0.33      2    1    2  2.9e-007 3.4e-
015
  2        0.31         69     0.1000000    0.34      3    2    4   2e-007 3.5e-
015
  3       8e-008    5.7e+003    1.0000000    0.3       4    3    6  1.2e-007 5.4e-
012
  4       4.2e-009     16    1.0000000    9e-008    5    4    8  1.1e-006 8.5e-
010
Solution time: 15 s.
Physical memory: 2.97 GB
Virtual memory: 3.71 GB
Ended at 12-Feb-2024 14:05:23.
----- Stationary Solver 1 in Study 1/Solution 1 (sol1) ----->

```

### Fully Coupled 1 (fc1)

#### GENERAL

| Description   | Value                    |
|---------------|--------------------------|
| Linear solver | <a href="#">Direct 1</a> |

#### METHOD AND TERMINATION

| Description                  | Value |
|------------------------------|-------|
| Initial damping factor       | 0.01  |
| Minimum damping factor       | 1E-6  |
| Maximum number of iterations | 50    |

## Direct 1 (d1)

### GENERAL

| Description     | Value |
|-----------------|-------|
| Pivot threshold | 0.1   |

## 4 Results

### 4.1 DATA SETS

#### 4.1.1 Study 1/Solution 1

##### SOLUTION

| Description | Value                             |
|-------------|-----------------------------------|
| Solution    | <a href="#">Solution 1 (sol1)</a> |
| Component   | Component 1 (comp1)               |

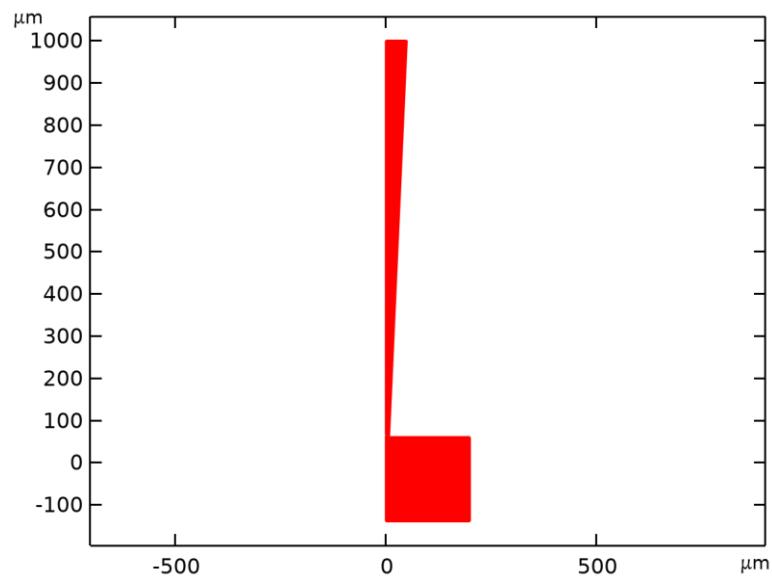

Dataset: Study 1/Solution 1

#### 4.1.2 Revolution 2D

##### DATA

| Description | Value                                     |
|-------------|-------------------------------------------|
| Dataset     | <a href="#">Study 1/Solution 1 (sol1)</a> |

##### AXIS DATA

| Description       | Value            |
|-------------------|------------------|
| Axis entry method | Two points       |
| Points            | {{0, 0}, {0, 1}} |

##### REVOLUTION LAYERS

| Description | Value |
|-------------|-------|
| Start angle | -90   |



| Description      | Value |
|------------------|-------|
| Revolution angle | 225   |

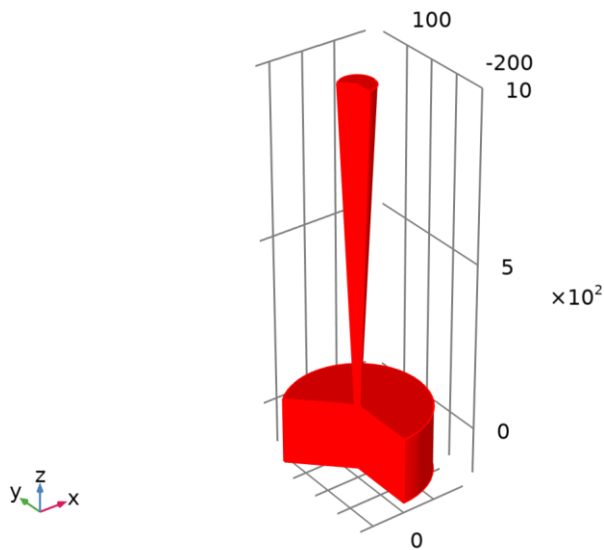

Dataset: Revolution 2D

### 4.1.3 Revolution 2D 2

#### DATA

| Description | Value                                     |
|-------------|-------------------------------------------|
| Dataset     | <a href="#">Study 1/Solution 1 (sol1)</a> |

#### AXIS DATA

| Description       | Value            |
|-------------------|------------------|
| Axis entry method | Two points       |
| Points            | {{0, 0}, {0, 1}} |

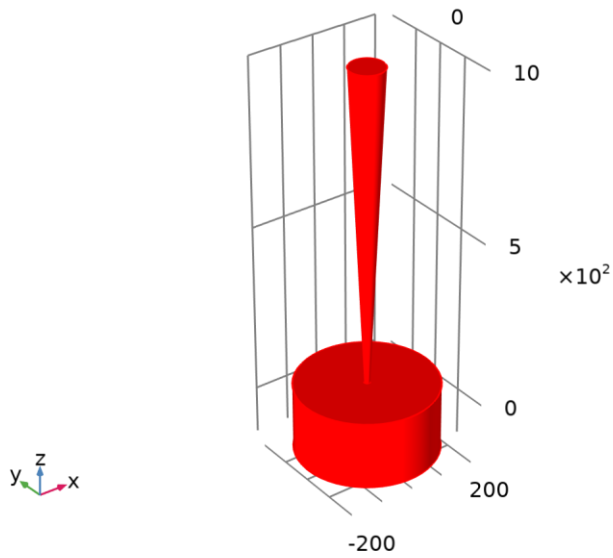

Dataset: Revolution 2D 2

## 4.2 DERIVED VALUES

### 4.2.1 Line Integration 1

#### OUTPUT

Evaluated in [Table 1](#)

#### DATA

| Description | Value                                     |
|-------------|-------------------------------------------|
| Dataset     | <a href="#">Study 1/Solution 1 (sol1)</a> |

#### EXPRESSIONS

| Expression                                                                   | Unit | Description |
|------------------------------------------------------------------------------|------|-------------|
| $(\text{tds.bndFlux\_cNa} - \text{tds.bndFlux\_cCl}) * 96480 [\text{C/mol}]$ | A    |             |

#### INTEGRATION SETTINGS

| Description              | Value |
|--------------------------|-------|
| Integration order        | 4     |
| Compute surface integral | On    |

## 4.3 TABLES

### 4.3.1 Evaluation 2D

Interactive 2D values

### 4.3.2 Table 1

Line Integration 1 ((tds.bndFlux\_cNa-tds.bndFlux\_cCl)\*96480[C/mol])

|                                                           |
|-----------------------------------------------------------|
| <b>(tds.bndFlux_cNa-tds.bndFlux_cCl)*96480[C/mol] (A)</b> |
| 2.4643E-7                                                 |

## 4.4 PLOT GROUPS

### 4.4.1 Concentration (tds)

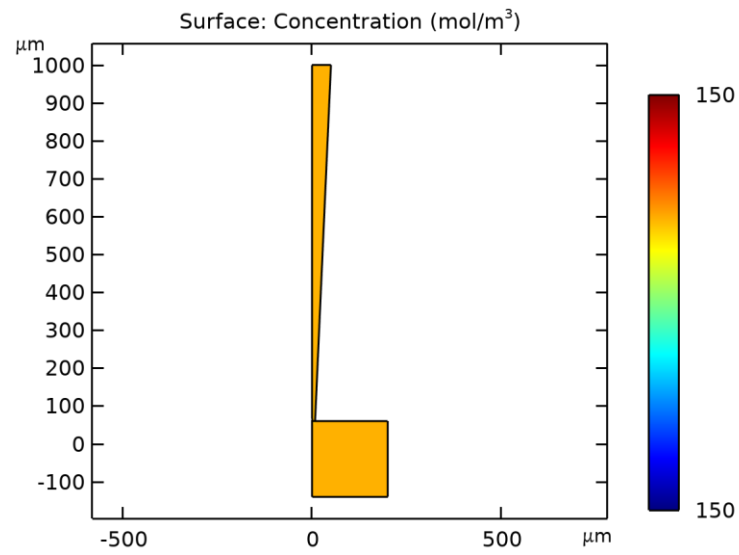

Surface: Concentration (mol/m<sup>3</sup>)

### 4.4.2 Concentration (tds) 1

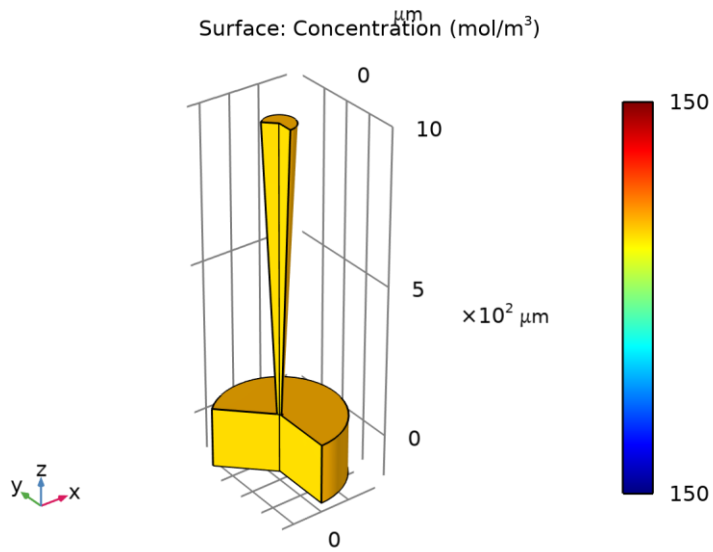

Surface: Concentration ( $\text{mol/m}^3$ )

### 4.4.3 Electric Potential (es)

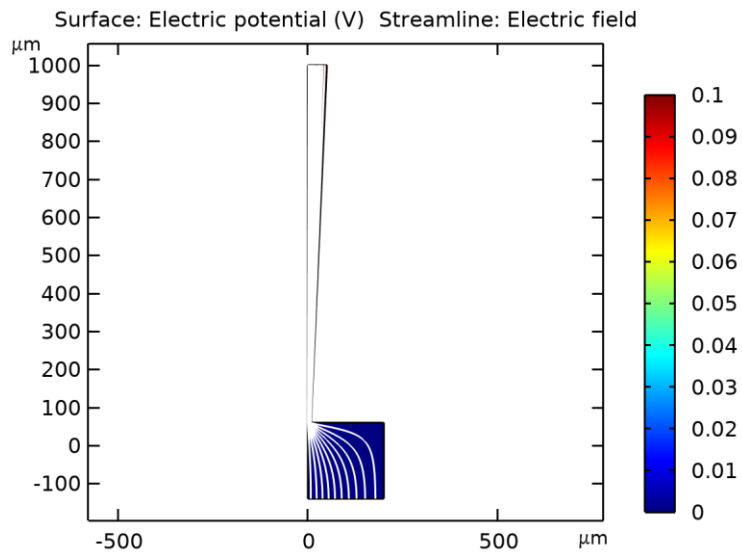

Surface: Electric potential (V) Streamline: Electric field

#### 4.4.4 Electric Potential, Revolved Geometry (es)

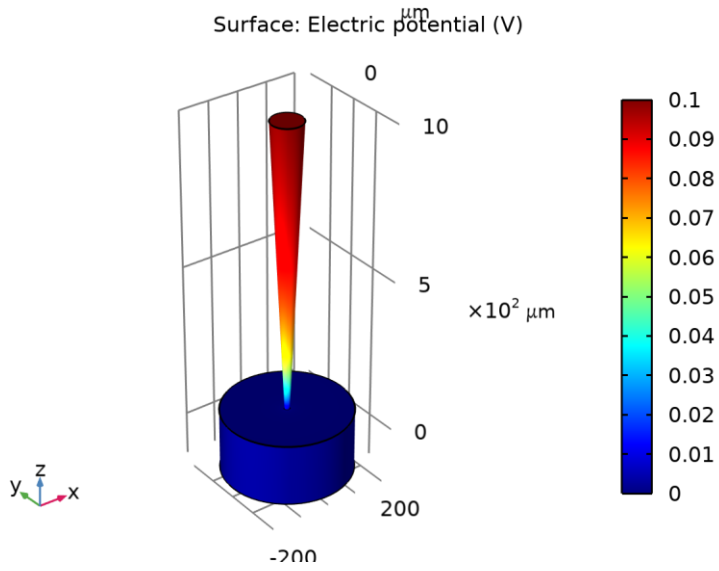

Surface: Electric potential (V)

#### 4.4.5 1D Plot Group 5

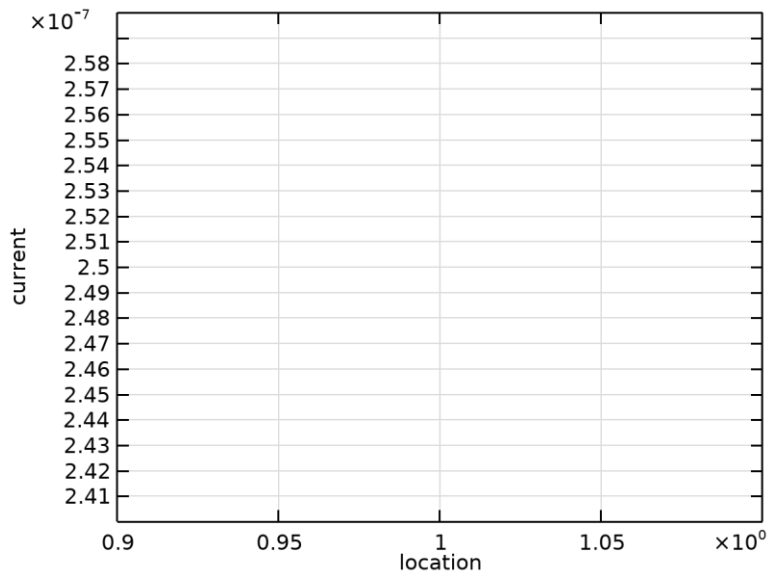

Point Graph: Concentration ( $\text{mol}/\text{m}^3$ )
